# Supplementary material for: Synthesis and Molecular Docking Studies of Alkoxy- and Imidazole-Substituted Xanthones as α-Amylase and α-Glucosidase Inhibitors
Source: MDPI journal article supplement (doi:10.3390/molecules28104180), 2023-05-18
Supplement: s1 [file s1]

## Supplementary Material

# Synthesis and Molecular Docking Studies of Alkoxy- and Imidazole-Substituted Xanthonones as $\alpha$ -Amylase and $\alpha$ -Glucosidase Inhibitors

Dolores G. Aguila-Muñoz <sup>1</sup>, Gabriel Vázquez-Lira <sup>1</sup>, Erika Sarmiento-Tlale <sup>1</sup>,  
María C. Cruz-López <sup>1</sup>, Fabiola E. Jiménez-Montejo <sup>1</sup>, Víctor E. López y López <sup>1</sup>,  
Carlos H. Escalante <sup>2</sup>, Dulce Andrade-Pavón <sup>3,4</sup>, Omar Gómez-García <sup>2</sup>, Joaquín Tamariz <sup>2</sup> and  
Aarón Mendieta-Moctezuma <sup>1,\*</sup>

- <sup>1</sup> Centro de Investigación en Biotecnología Aplicada, Instituto Politécnico Nacional, Carretera Estatal Santa Inés Tecuexcomax-Tepetitla, Km 1.5, Tepetitla de Lardizábal, Tlaxcala 90700, Mexico;  
lupaita@gmail.com (D.G.A.-M.); eagle\_vl@hotmail.com (G.V.-L.);  
erika16.st@gmail.com (E.S.-T.); ccruzl@ipn.mx (M.C.C.-L.); fejimenezm@ipn.mx (F.E.J.-M.); vlopezyl@ipn.mx (V.E.L.y.L.)
- <sup>2</sup> Departamento de Química Orgánica, Escuela Nacional de Ciencias Biológicas, Instituto Politécnico Nacional, Prol. Carpio y Plan de Ayala S/N, Mexico City 11340, Mexico; escalantecah@gmail.com (C.H.E.); gogamanj@hotmail.com (O.G.-G.); jtamariz@yahoo.com.mx (J.T.)
- <sup>3</sup> Departamento de Fisiología, Escuela Nacional de Ciencias Biológicas, Instituto Politécnico Nacional, Av. Wilfrido Massieu S/N, Mexico City 11340, México; andrade\_eclud88@hotmail.com
- <sup>4</sup> Departamento de Microbiología, Escuela Nacional de Ciencias Biológicas, Instituto Politécnico Nacional, Prol. Carpio y Plan de Ayala S/N, Mexico City 11340, Mexico
- \* Correspondence: amendietam@ipn.mx or epsilon\_1409@yahoo.com.mx

Copies of <sup>1</sup>H and <sup>13</sup>C NMR, and HRMS spectra for compounds **3-12**

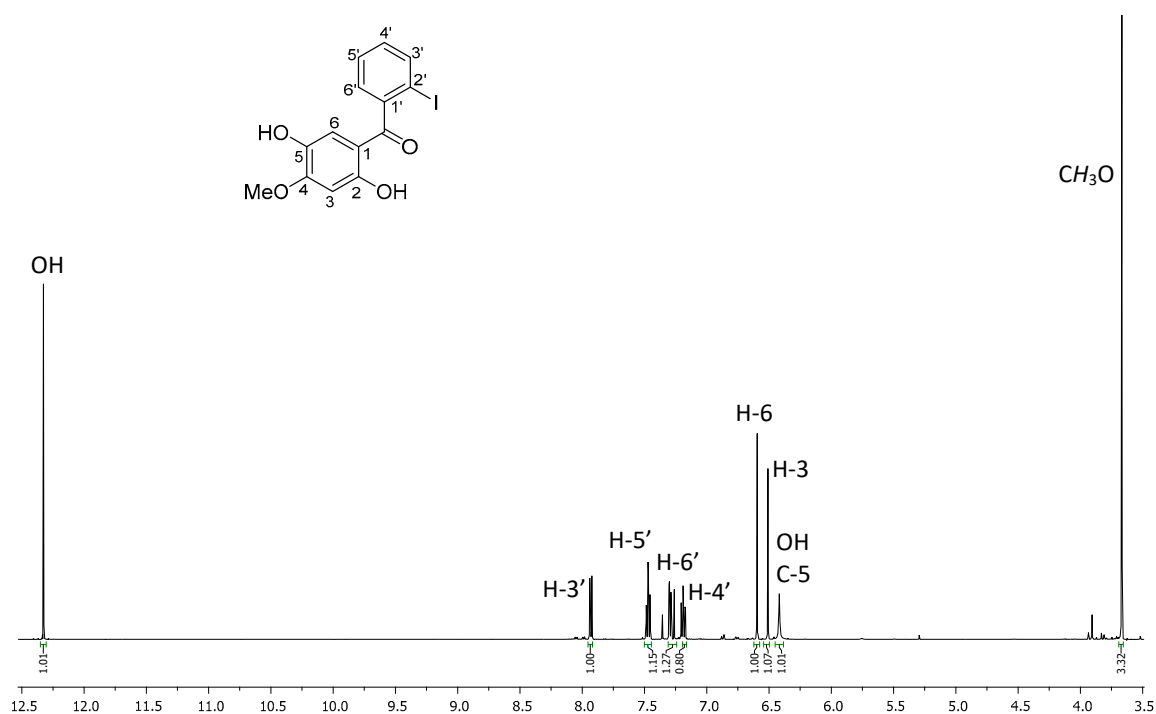

**Figure S1.**  $^1\text{H}$  NMR (500 MHz,  $\text{CDCl}_3$ ) spectrum of **3a**.

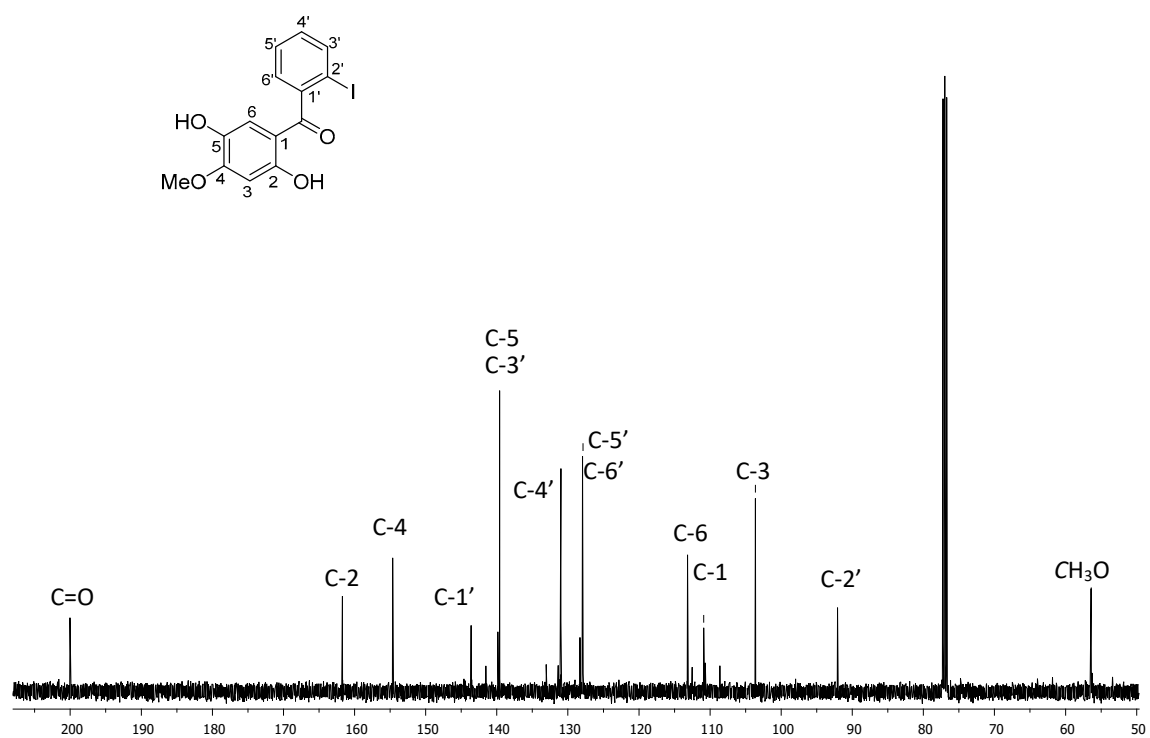

**Figure S2.**  $^{13}\text{C}$  NMR (125 MHz,  $\text{CDCl}_3$ ) spectrum of **3a**.

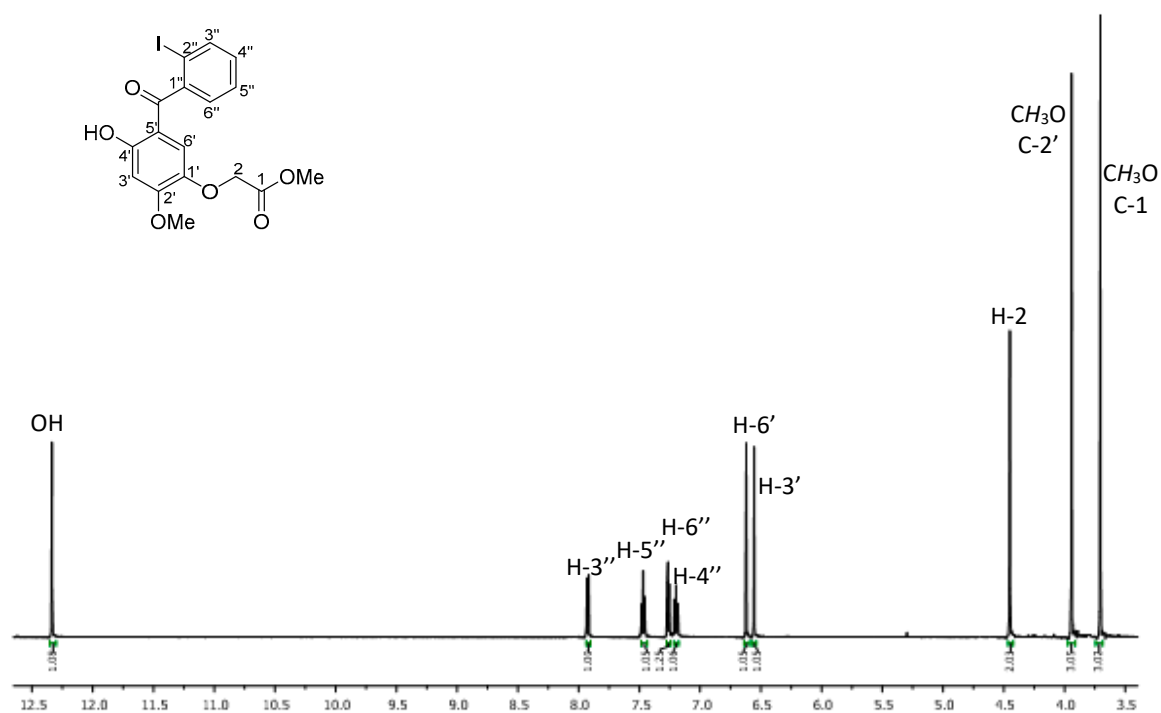

**Figure S3.**  $^1\text{H}$  NMR (500 MHz,  $\text{CDCl}_3$ ) spectrum of **3b**.

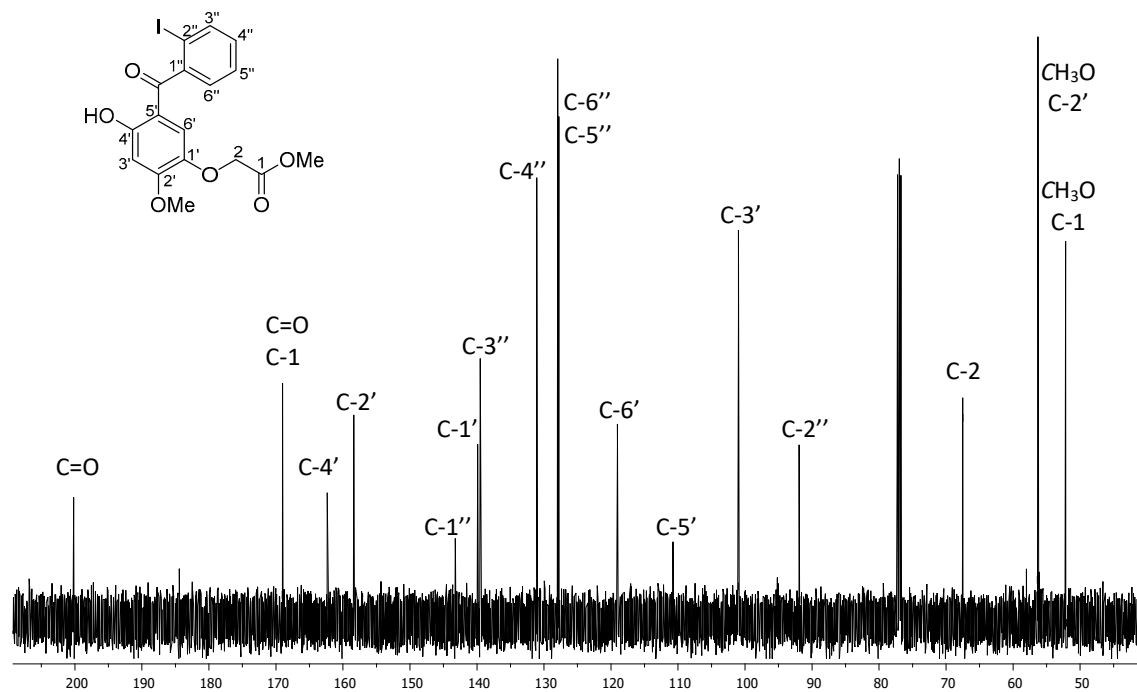

**Figure S4.**  $^{13}\text{C}$  NMR (125 MHz,  $\text{CDCl}_3$ ) spectrum of **3b**.

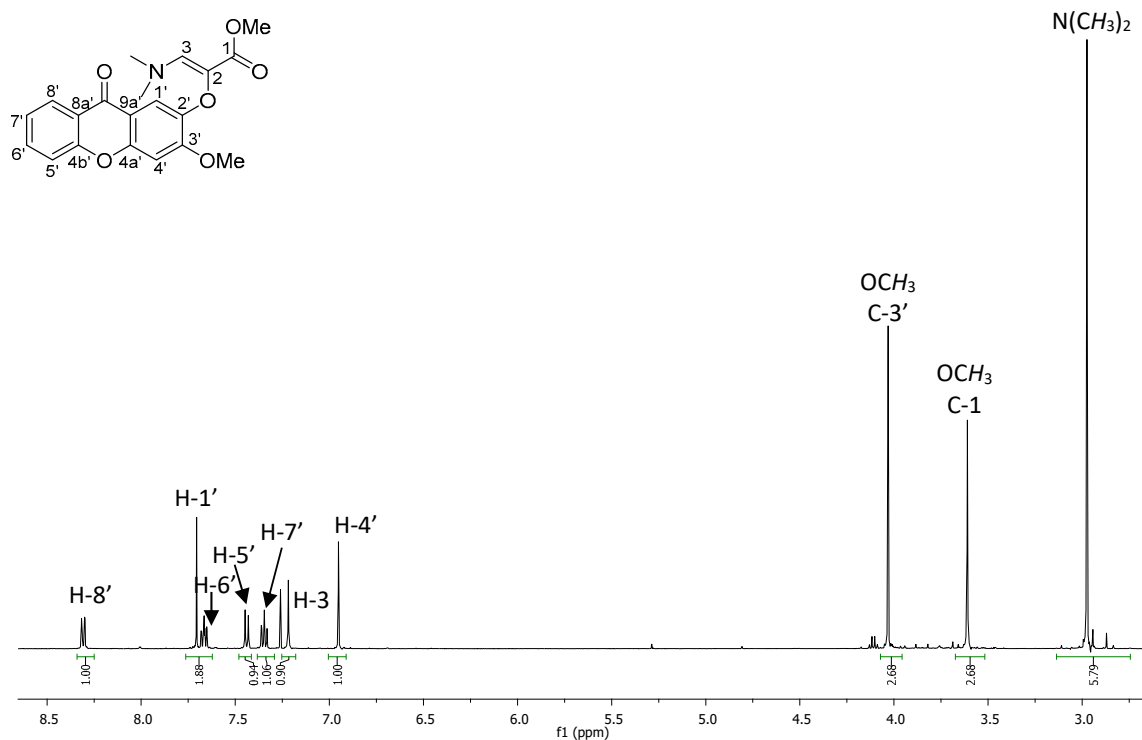

**Figure S5.**  $^1\text{H}$  NMR (500 MHz,  $\text{CDCl}_3$ ) spectrum of **5**.

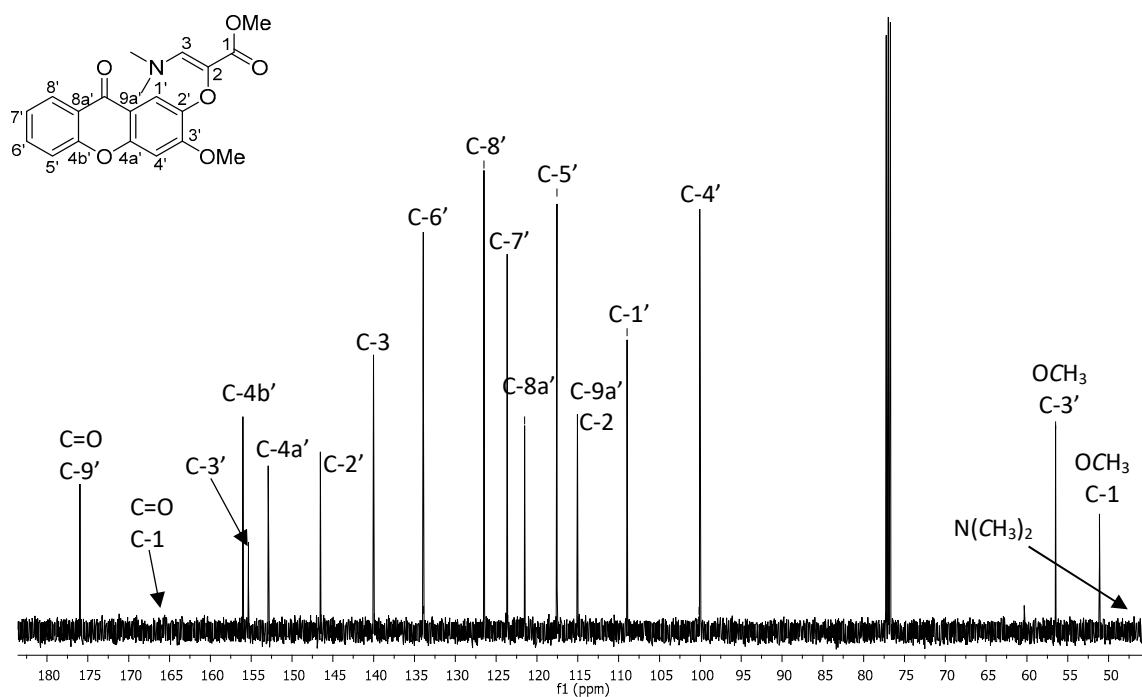

**Figure S6.**  $^{13}\text{C}$  NMR (125 MHz,  $\text{CDCl}_3$ ) spectrum of **5**.

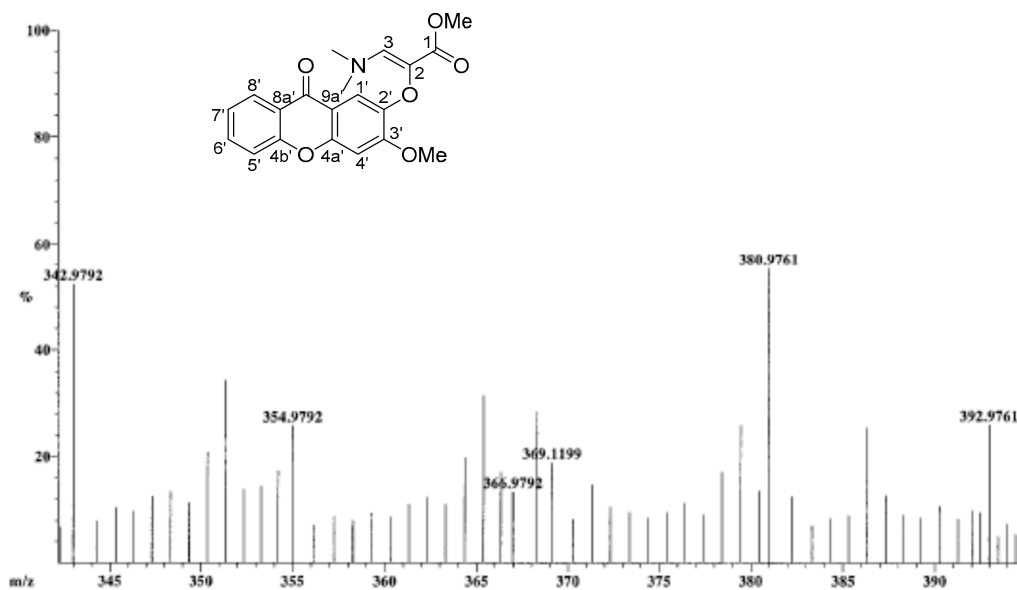

Selected Isotopes :  $H_{0.19}C_{0.20}N_{0.1}O_{0.6}$

Error Limit : 5 ppm

| <u>Measured</u><br><u>Mass</u> | <u>% Base</u> | <u>Formula</u>     | <u>Calculated</u><br><u>Mass</u> | <u>Error</u> |
|--------------------------------|---------------|--------------------|----------------------------------|--------------|
| 369.1199                       | 19.0%         | $C_{20}H_{19}NO_6$ | 369.1212                         | -3.6         |

Figure S7. HRMS (EI) spectra of compound 9a.

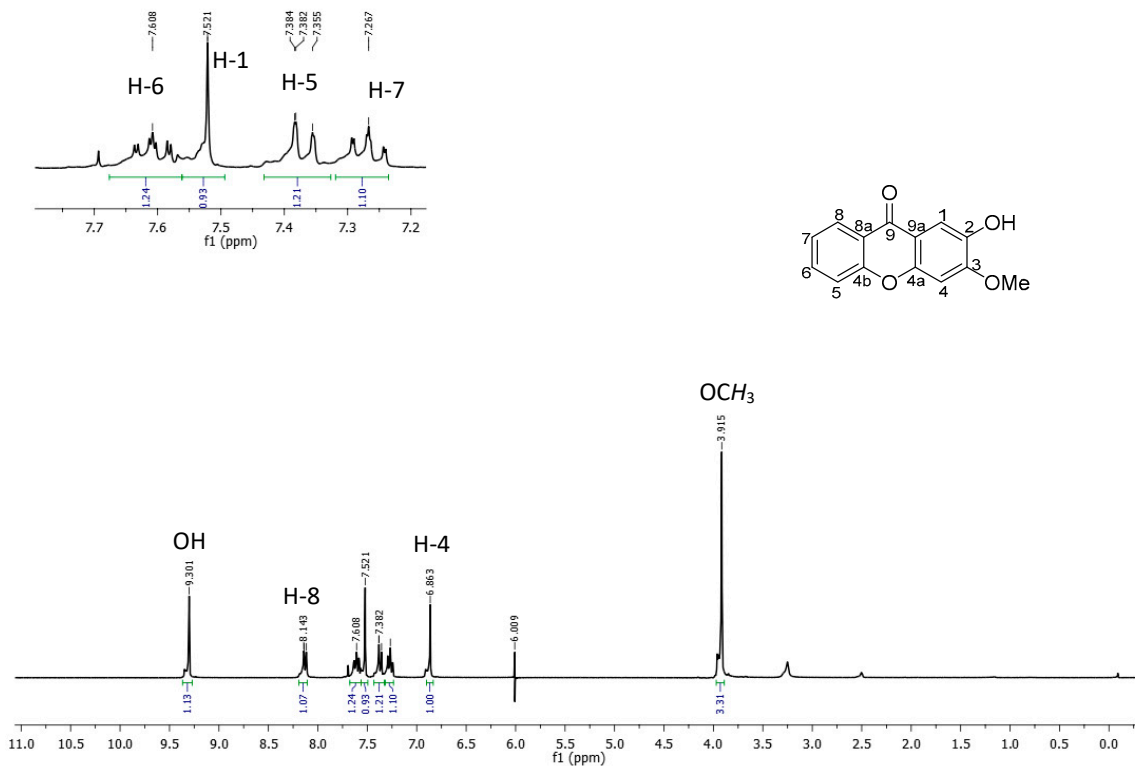

Figure S8.  $^1H$  NMR (300 MHz,  $DMSO-d_6$ ) spectrum of 1.

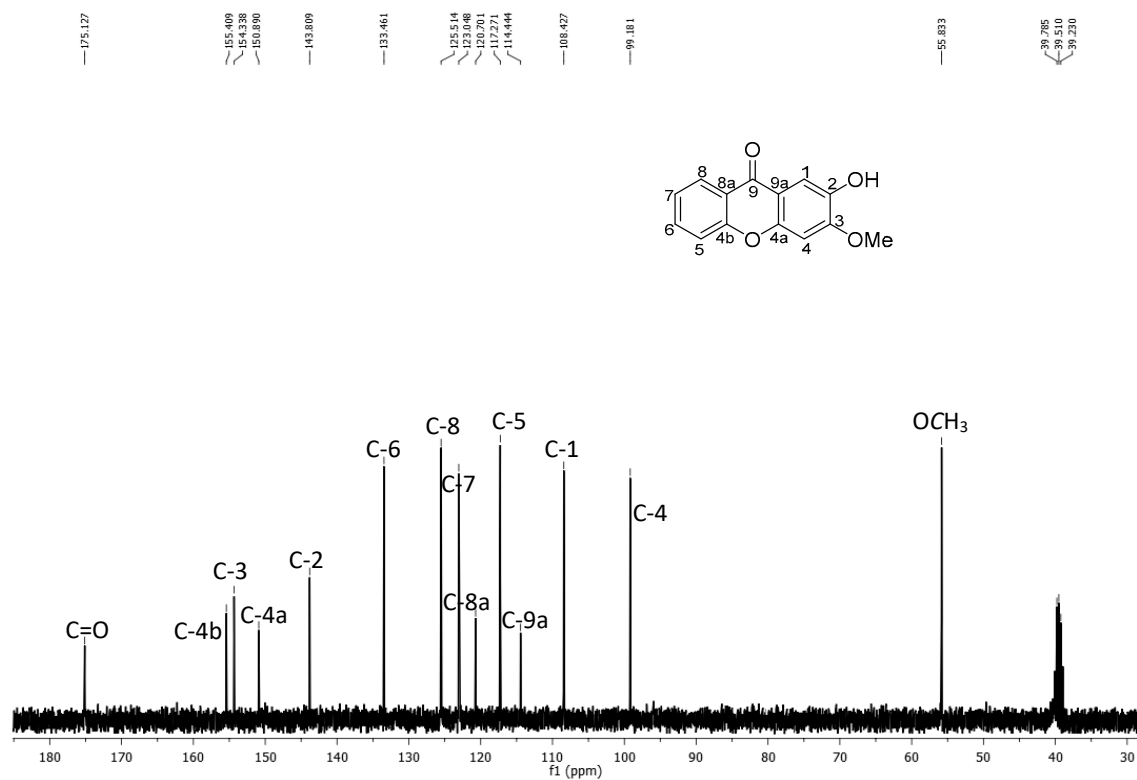

Figure S9. <sup>13</sup>C NMR (75 MHz, DMSO-*d*<sub>6</sub>) spectrum of 1.

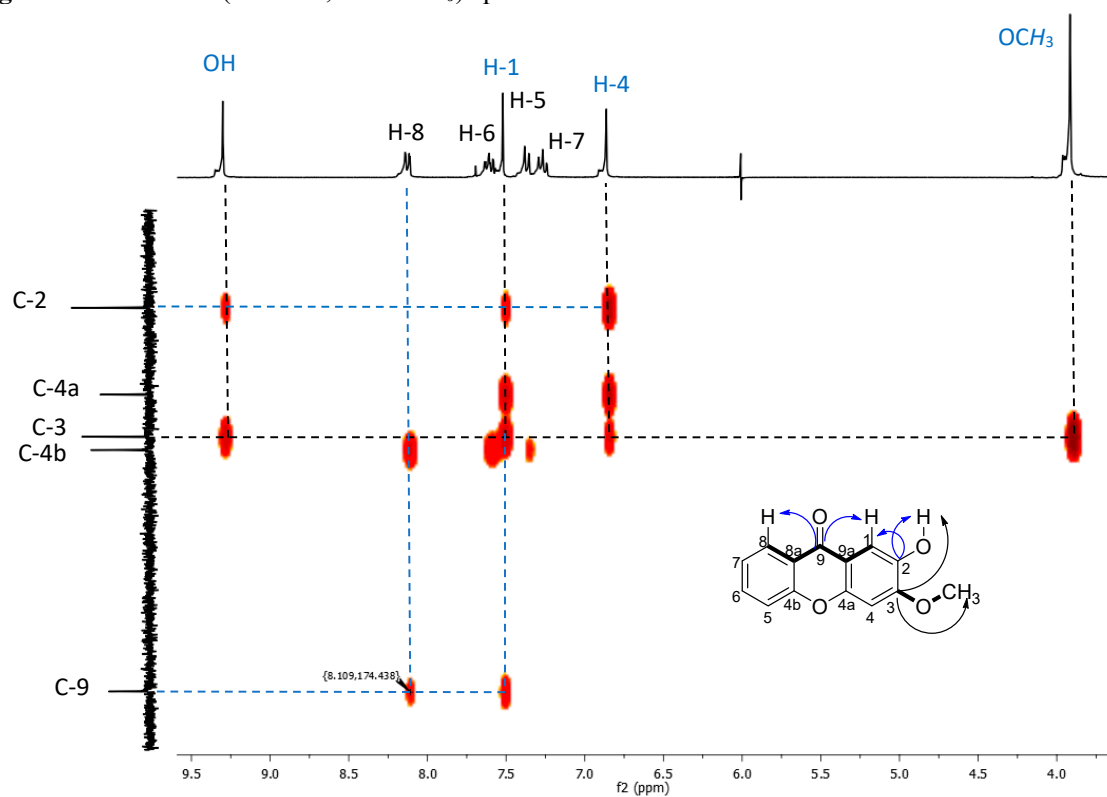

Figure S10. HMBC 2D NMR spectrum of 1.

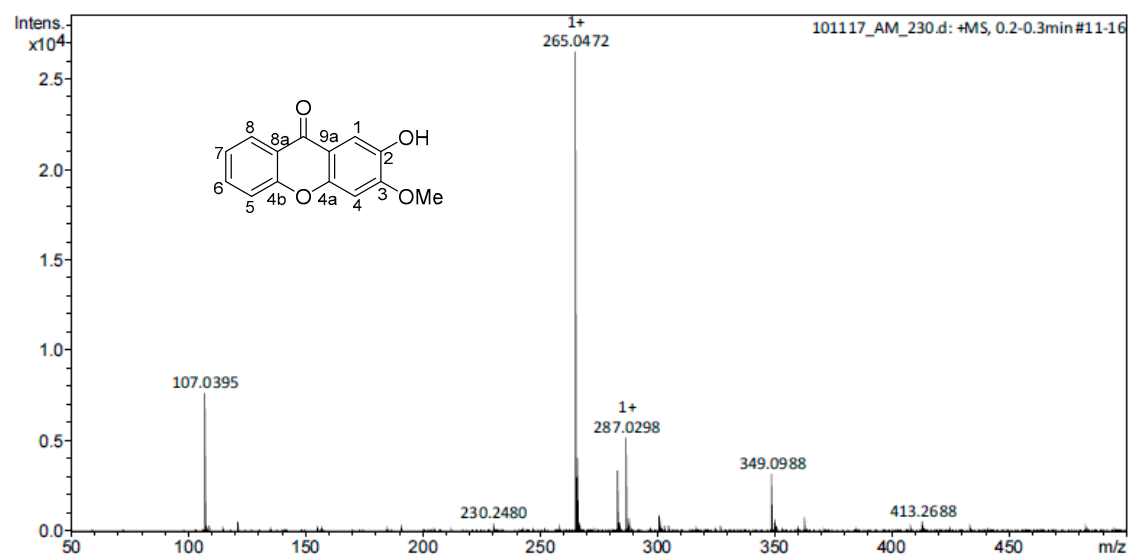

**Figure S11.** HRMS (ESI) spectra of compound **1**.

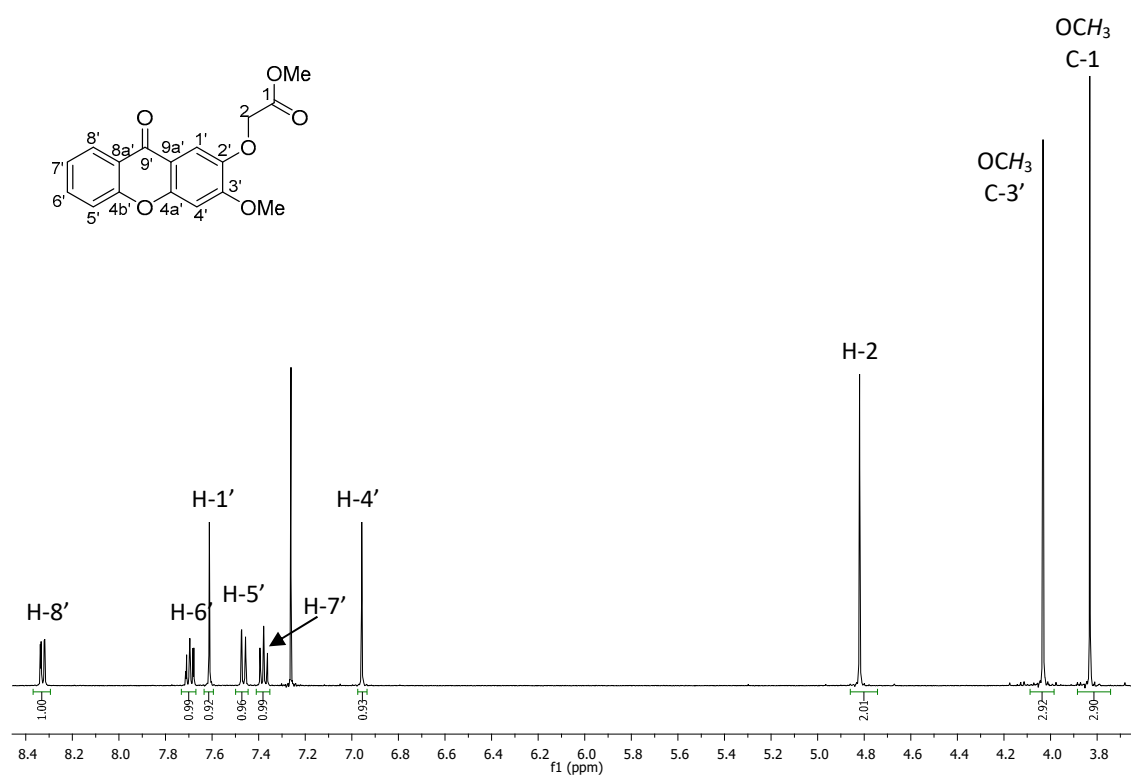

**Figure S12.**  $^1\text{H}$  NMR (500 MHz,  $\text{CDCl}_3$ ) spectrum of **6a**.

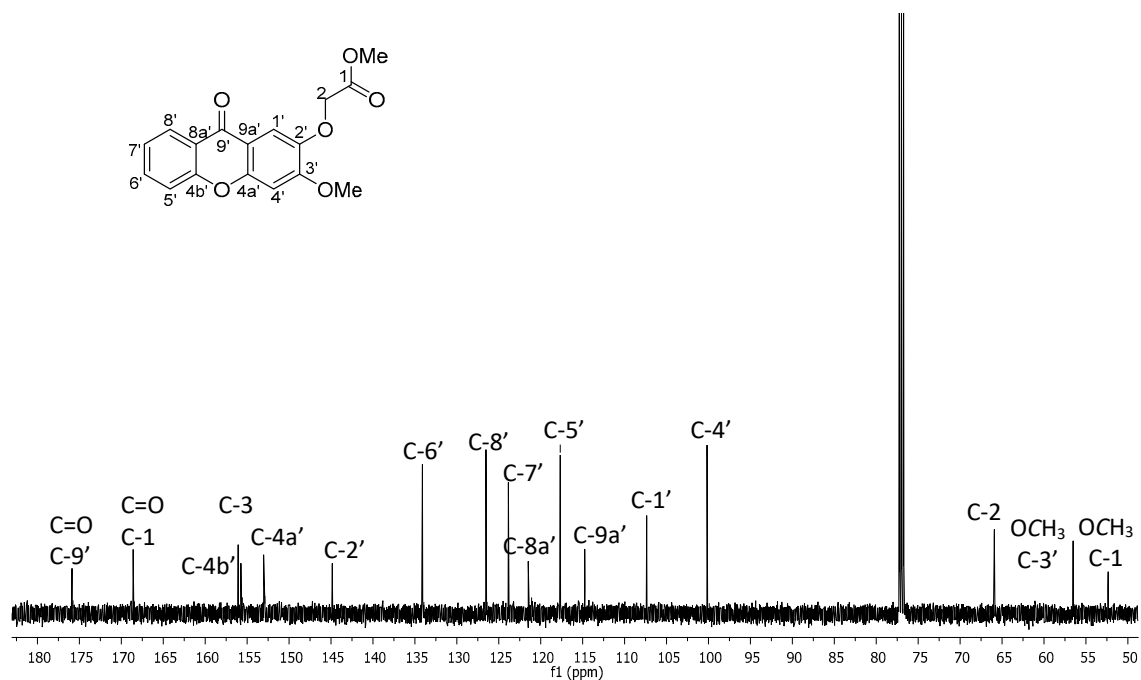

Figure S13.  $^{13}\text{C}$  NMR (125 MHz,  $\text{CDCl}_3$ ) spectrum of **6a**.

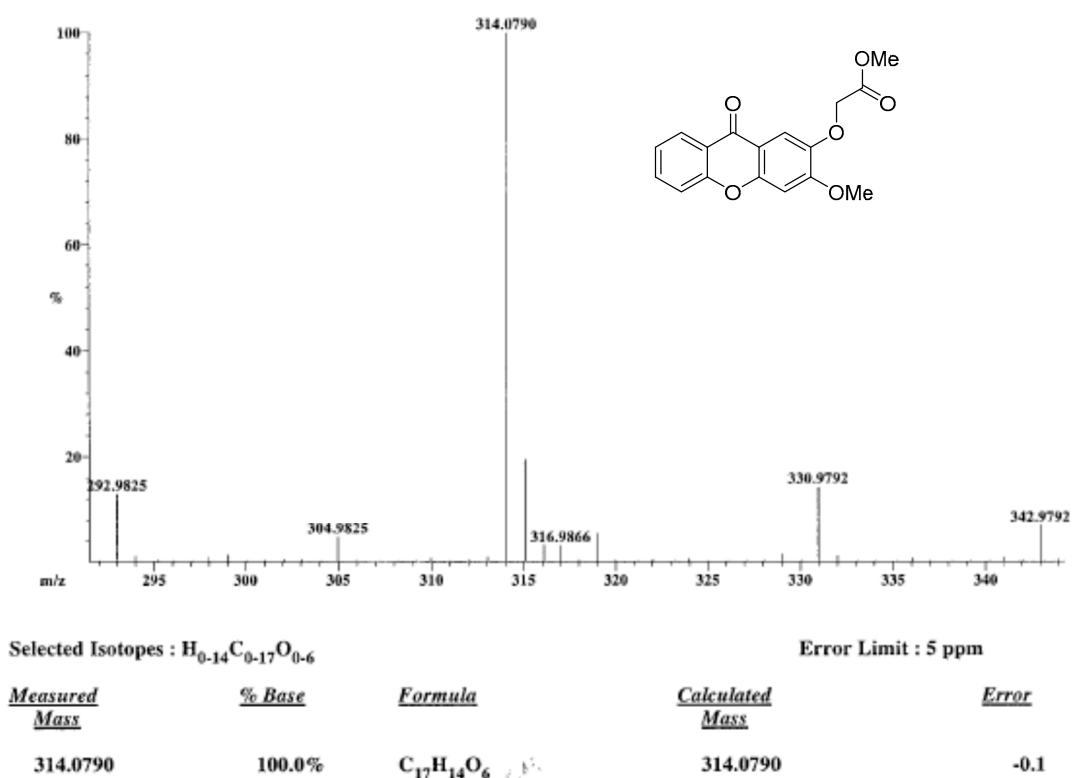

Figure S14. HRMS (EI) spectra of compound **6a**.



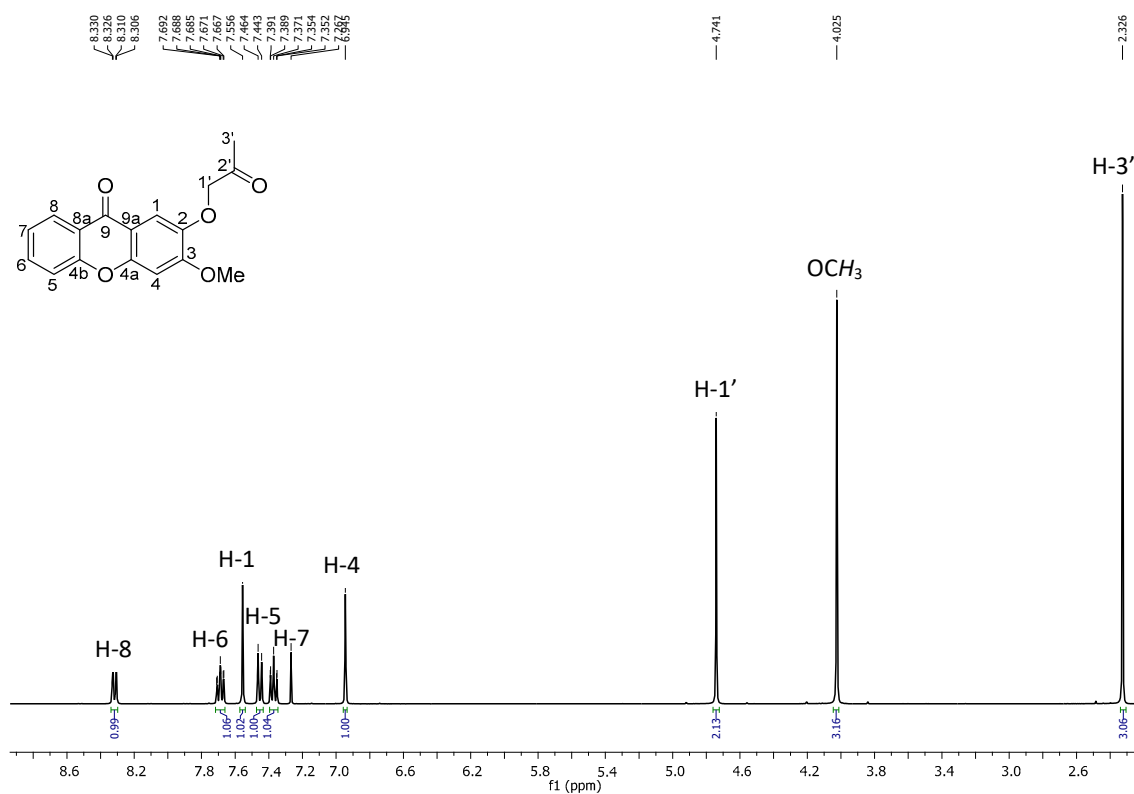

**Figure S15.** <sup>1</sup>H NMR (400 MHz, CDCl<sub>3</sub>) spectrum of **6b**.

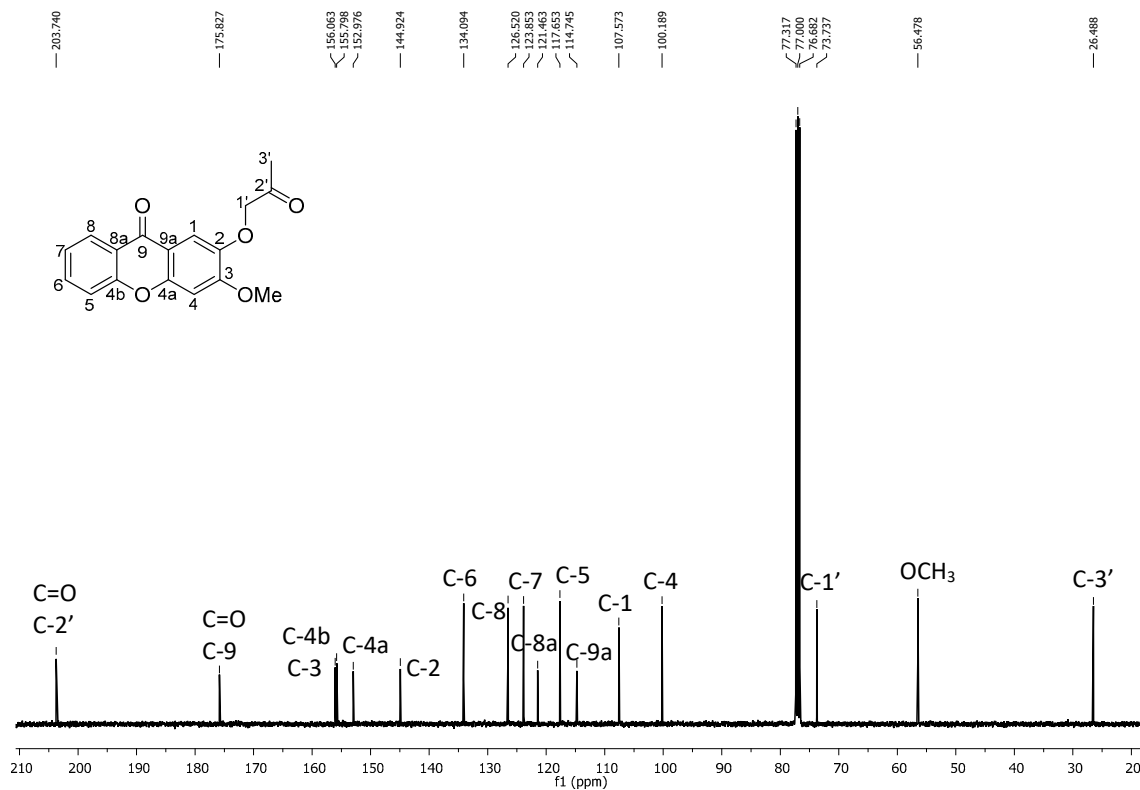

**Figure S16.** <sup>13</sup>C NMR (100 MHz, CDCl<sub>3</sub>) spectrum of **6b**.

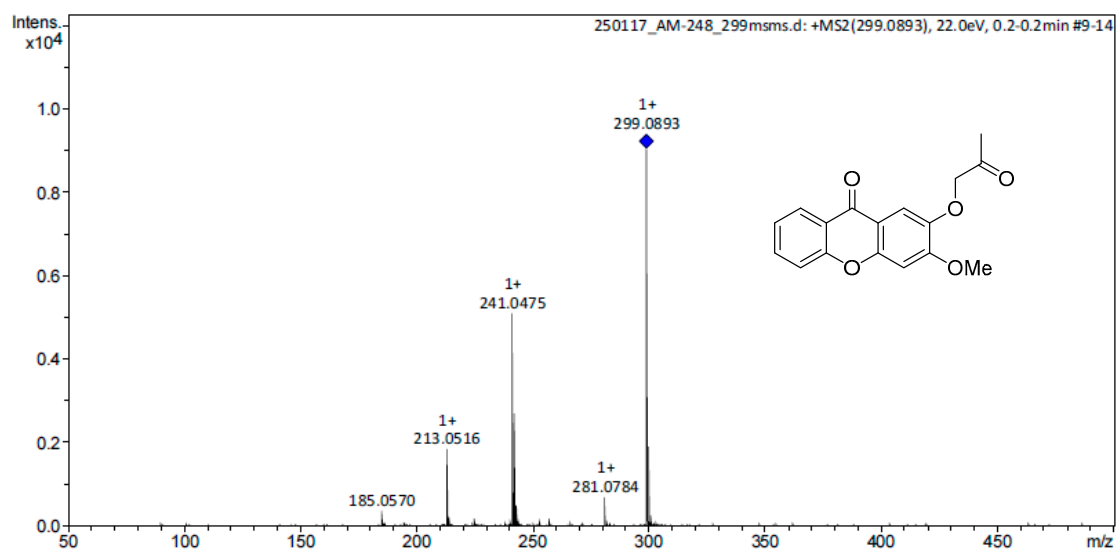

Figure S17. HRMS (ESI) spectra of compound **6b**.

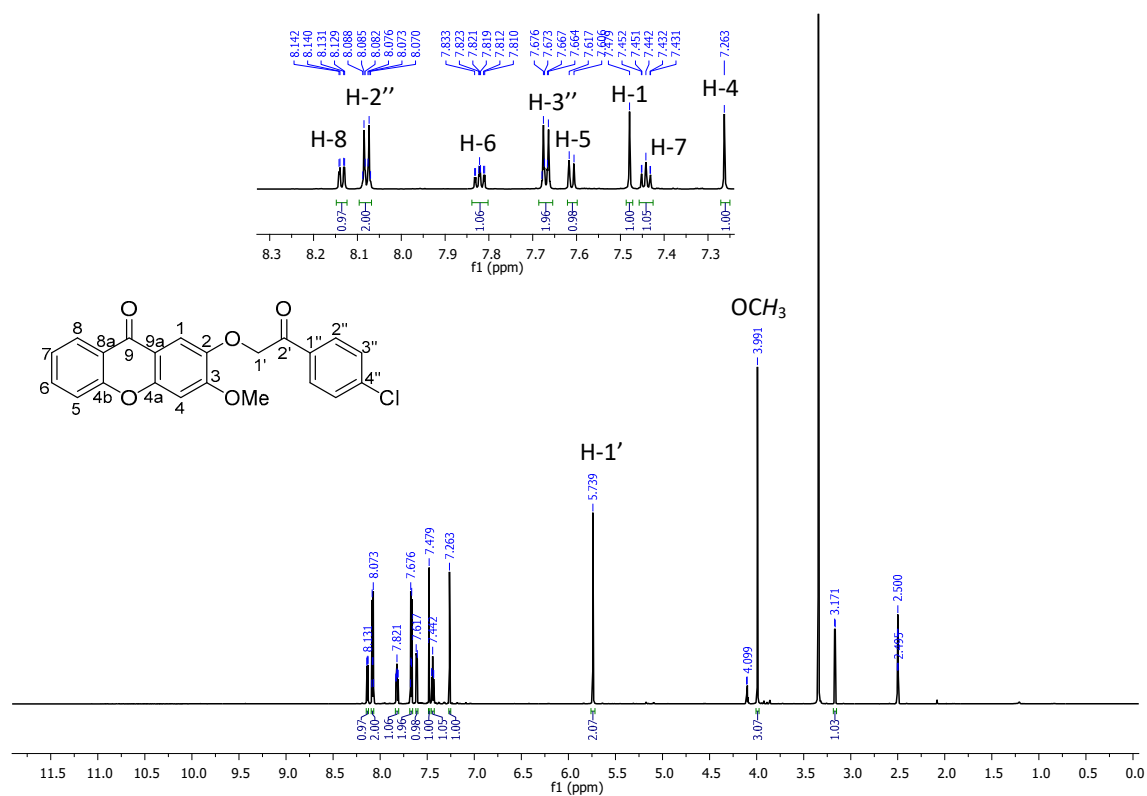

Figure S18. <sup>1</sup>H NMR (750 MHz, DMSO-*d*<sub>6</sub>) spectrum of **6c**.

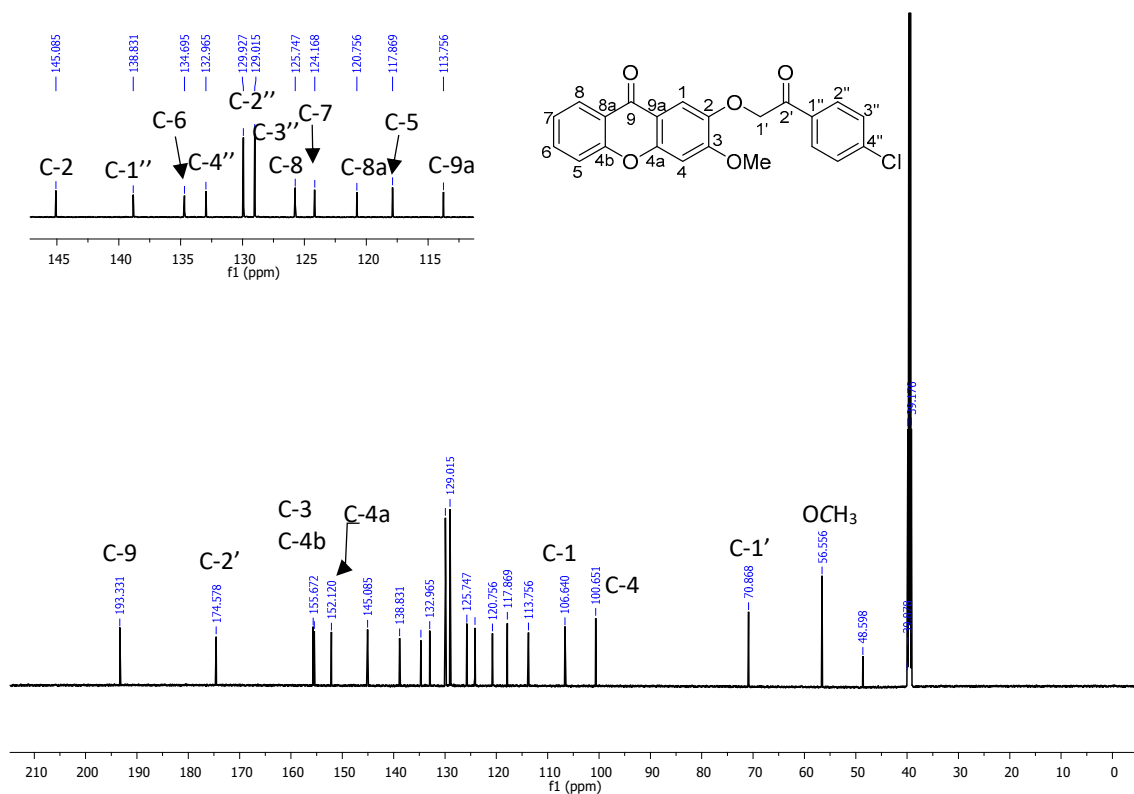

**Figure S19.**  $^{13}\text{C}$  NMR (187.5 MHz,  $\text{DMSO}-d_6$ ) spectrum of **6c**

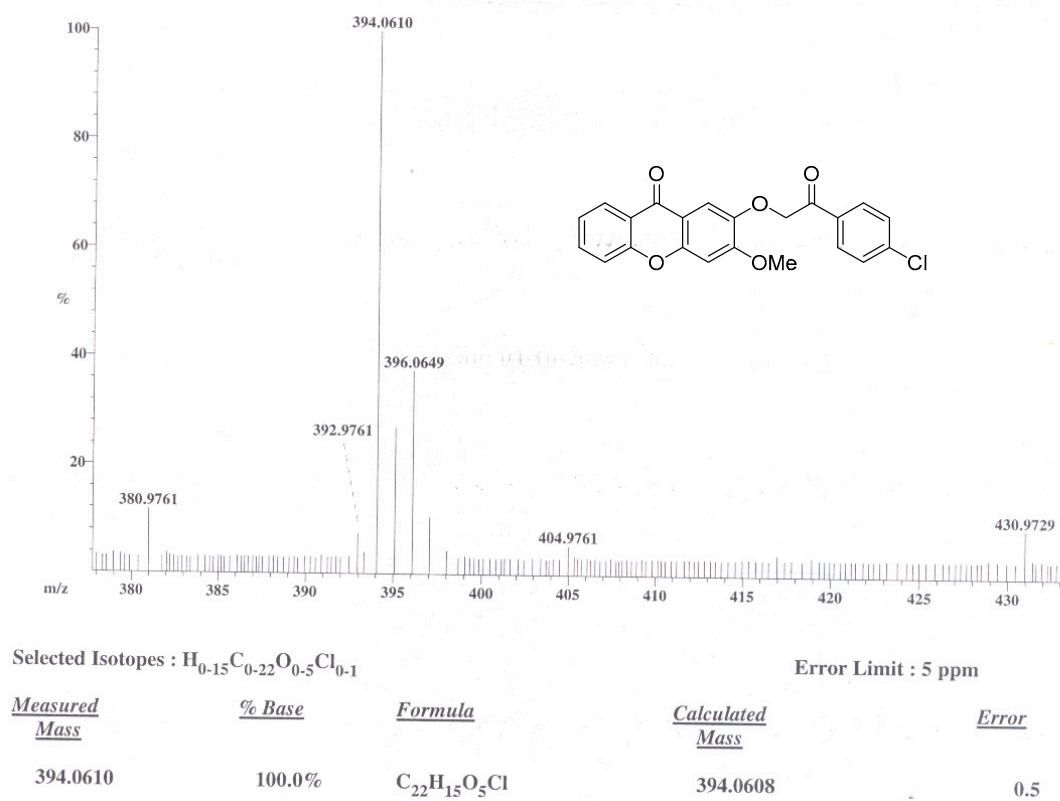

**Figure S20.** HRMS (EI) spectra of compound **6c**.

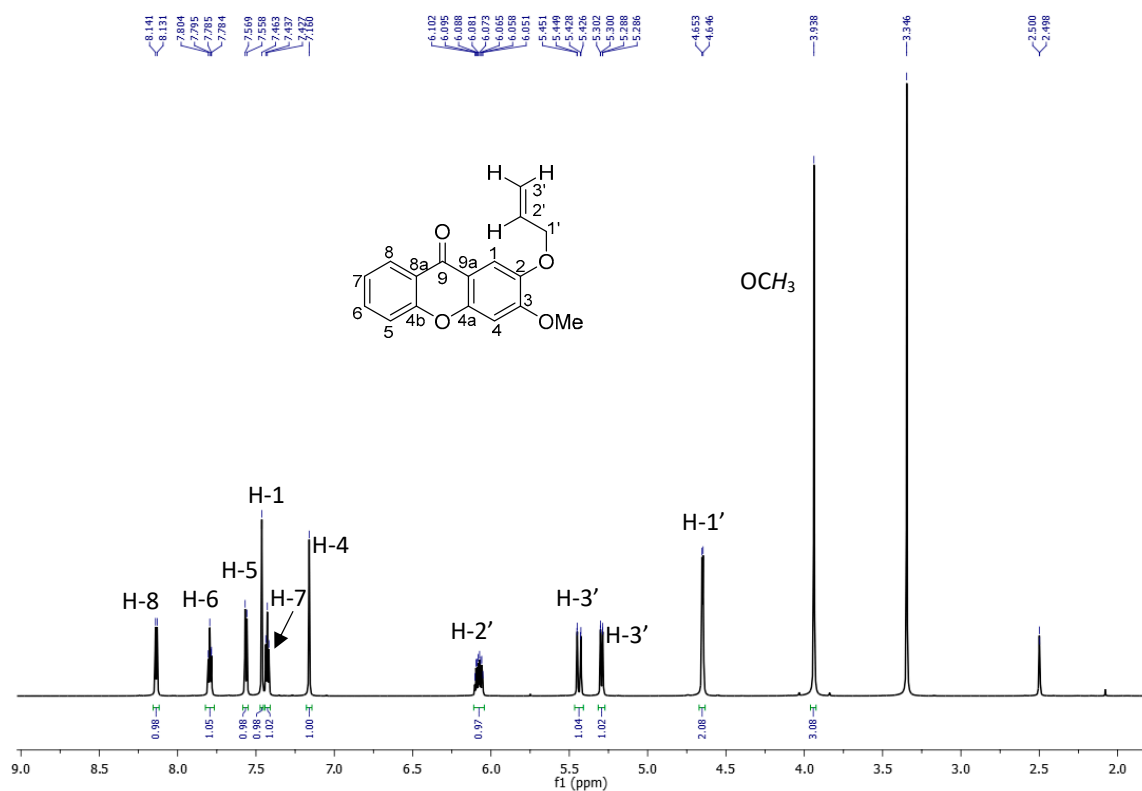

Figure S21. <sup>1</sup>H NMR (750 MHz, DMSO-*d*<sub>6</sub>) spectrum of 6d.

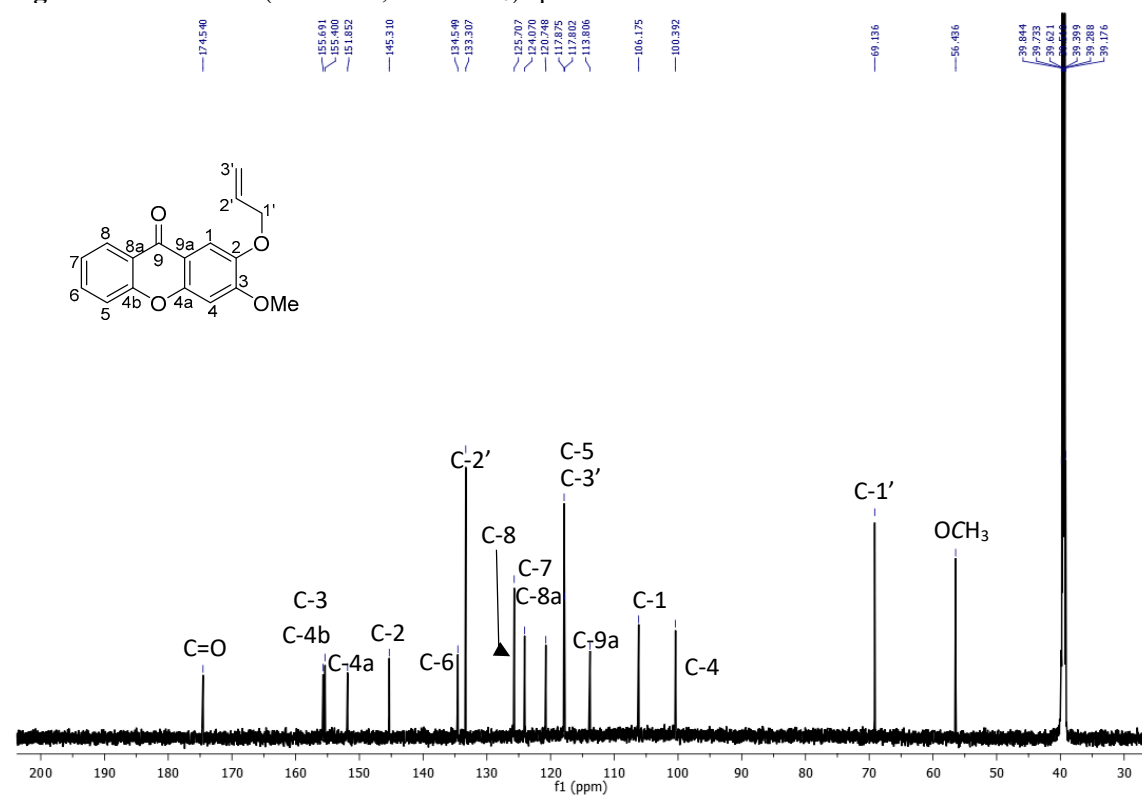

Figure S22. <sup>13</sup>C NMR (187.5 MHz, DMSO-*d*<sub>6</sub>) spectrum of 6d.

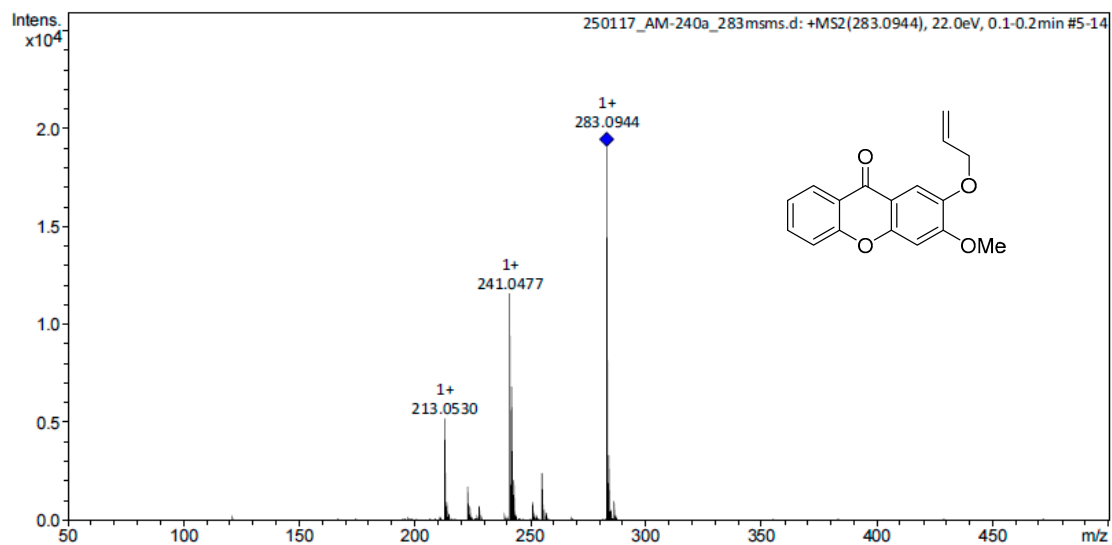

Figure S23. HRMS (ESI) spectra of compound 6d.

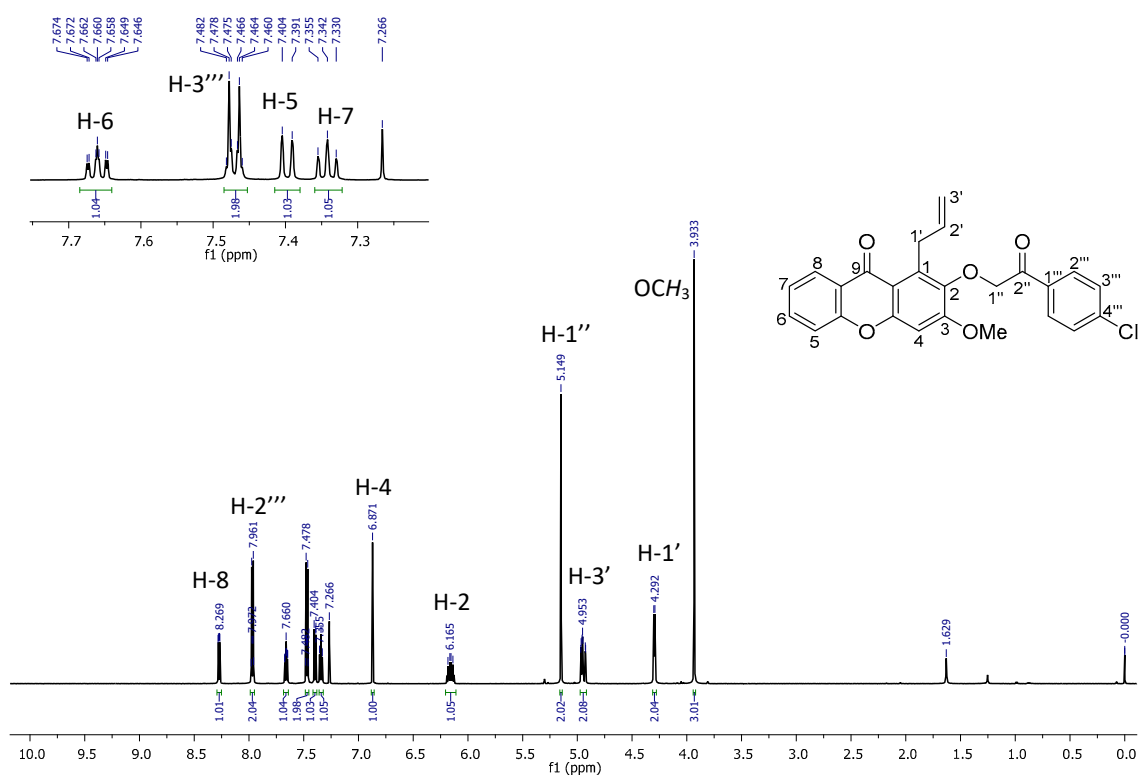

Figure S24.  $^1\text{H}$  NMR (600 MHz,  $\text{CDCl}_3$ ) spectrum of 6e.

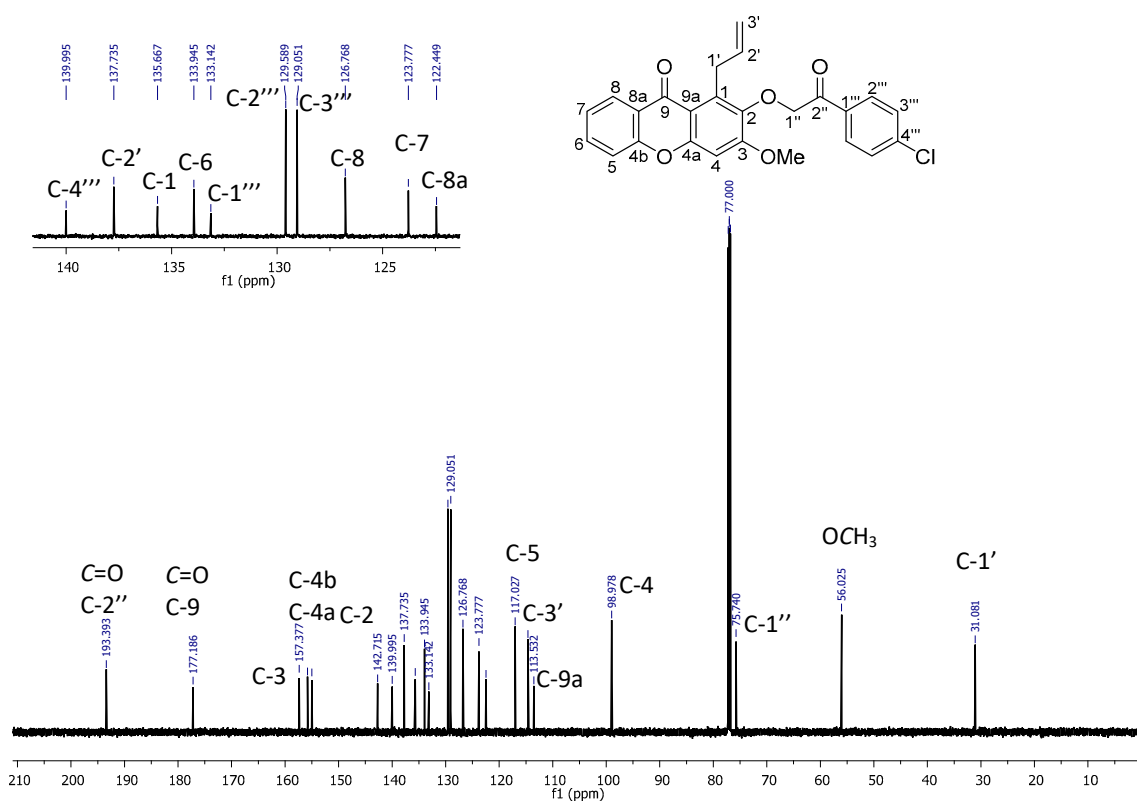

Figure S25.  $^{13}\text{C}$  NMR (150 MHz,  $\text{CDCl}_3$ ) spectrum of **6e**.

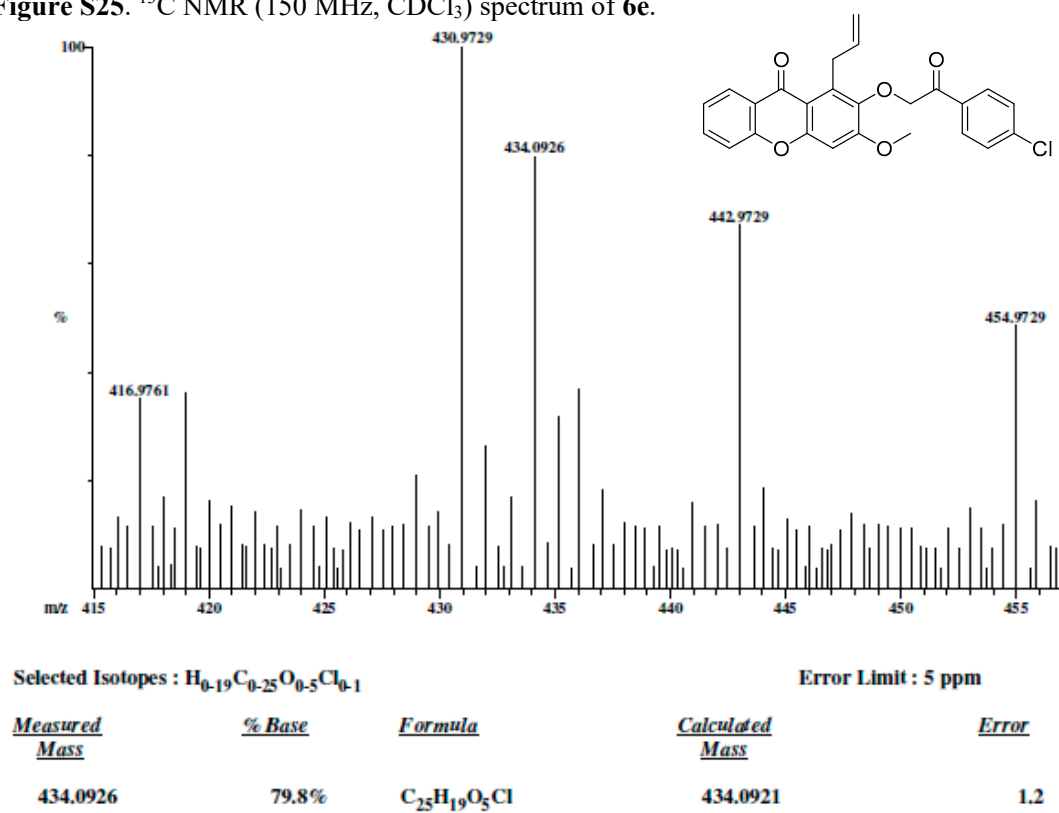

Figure S26. HRMS (EI) spectra of compound **6e**.

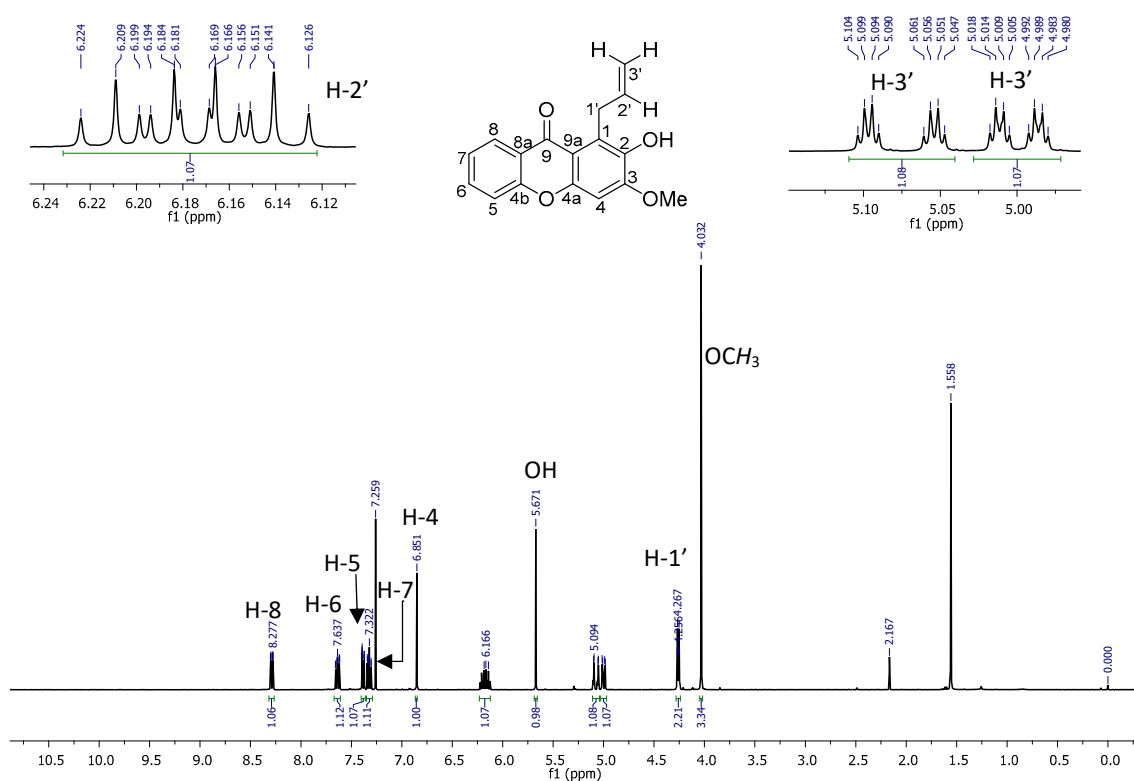

Figure S27.  $^1\text{H}$  NMR (750 MHz,  $\text{CDCl}_3$ ) spectrum of 7.

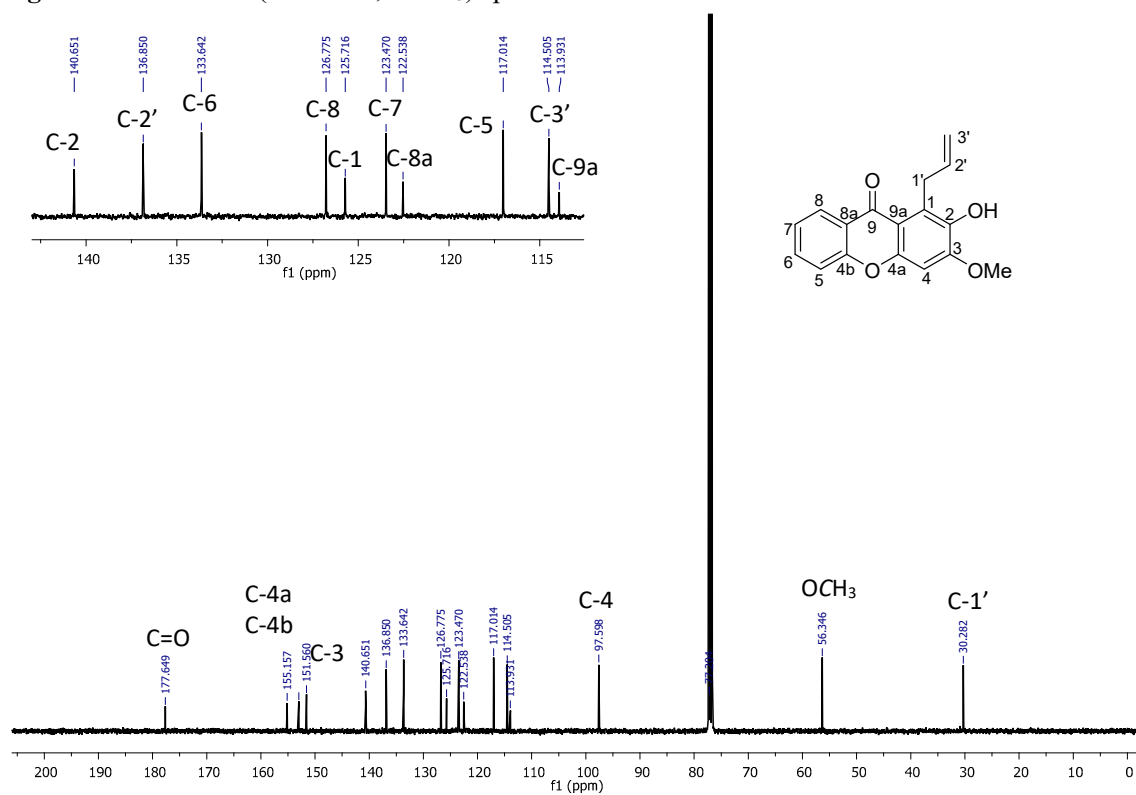

Figure S28.  $^{13}\text{C}$  NMR (187.5 MHz,  $\text{CDCl}_3$ ) spectrum of 7.

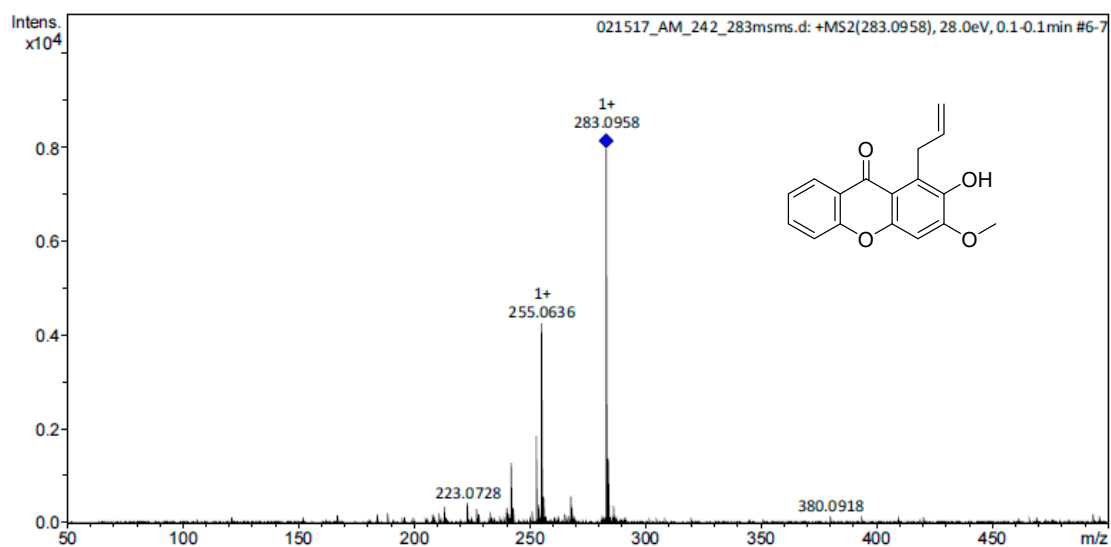

Figure S29. HRMS (ESI) spectra of compound 7.

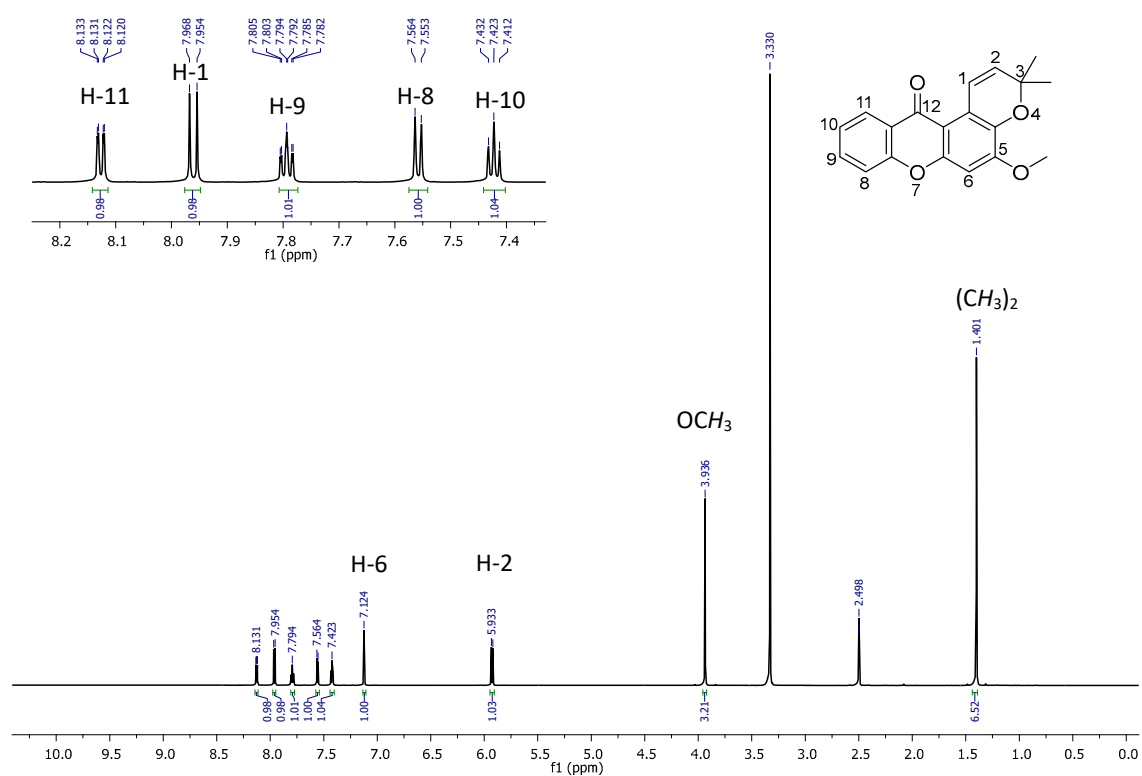

Figure 30 <sup>1</sup>H NMR (750 MHz, DMSO-*d*<sub>6</sub>) spectrum of 8.



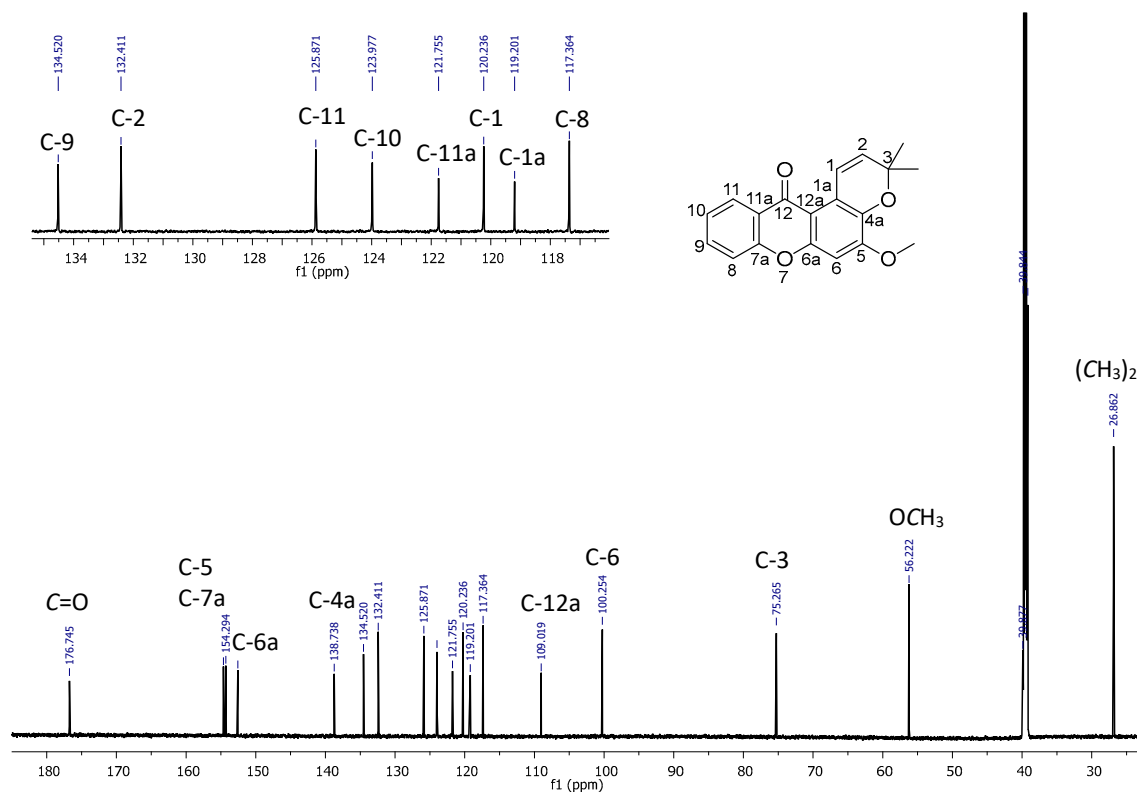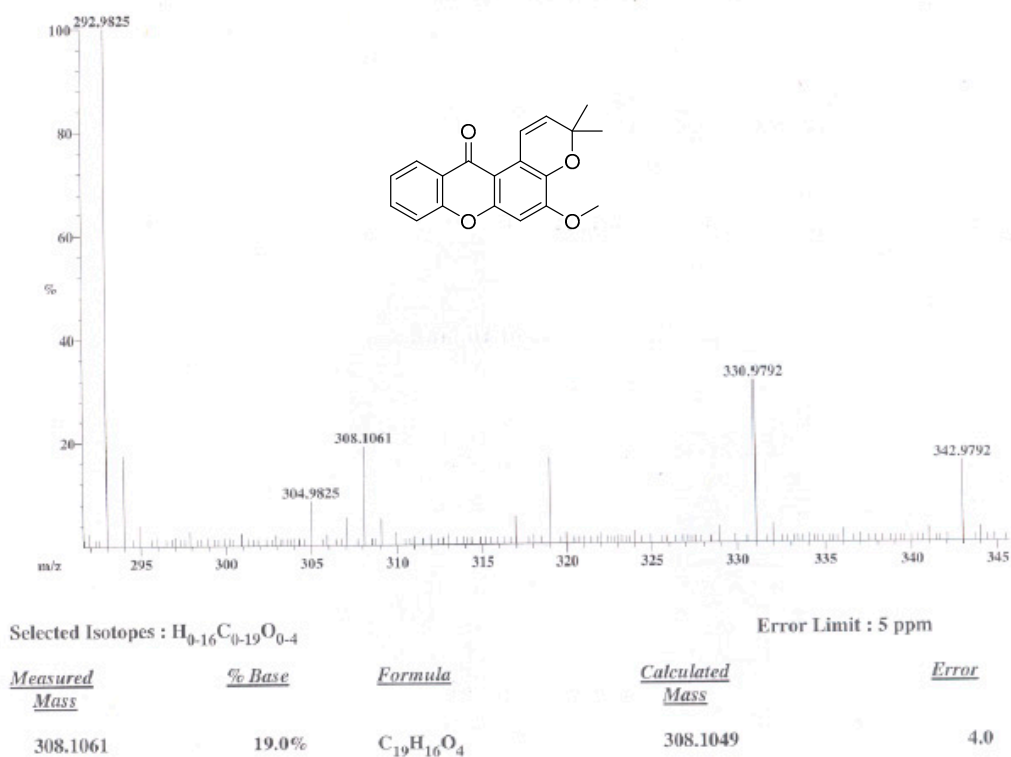

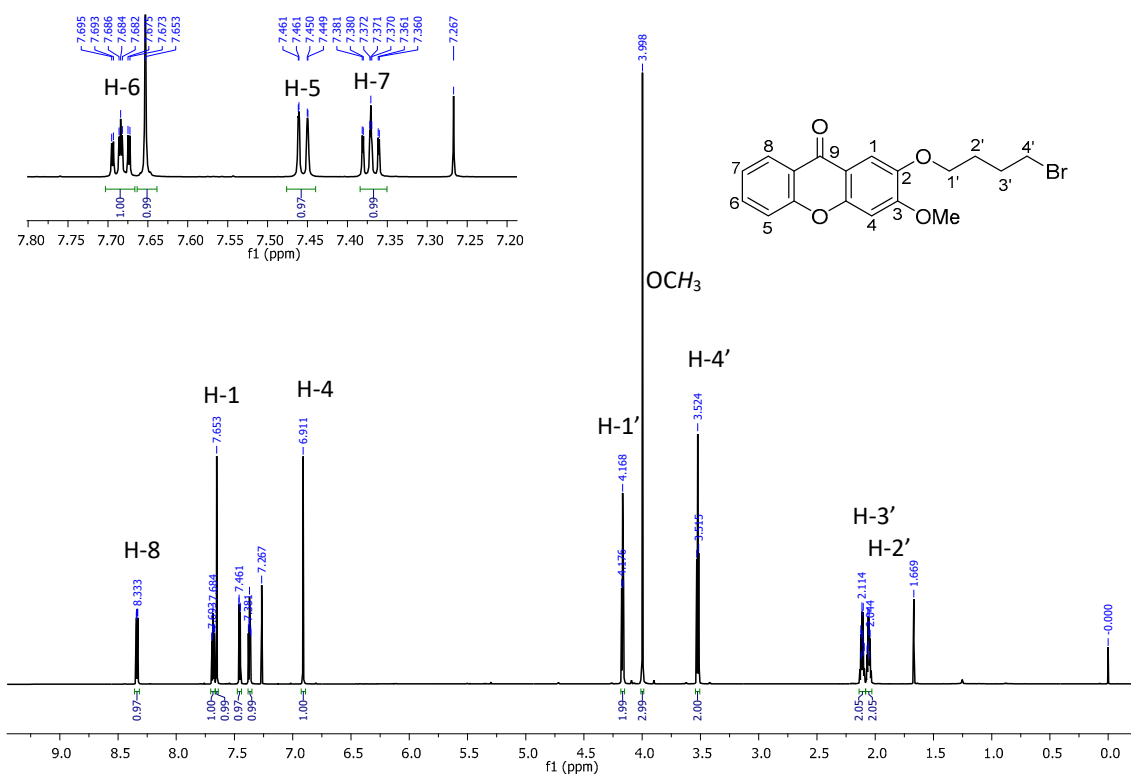

**Figure S33.**  $^1\text{H}$  NMR (750 MHz,  $\text{CDCl}_3$ ) spectrum of **9a**.

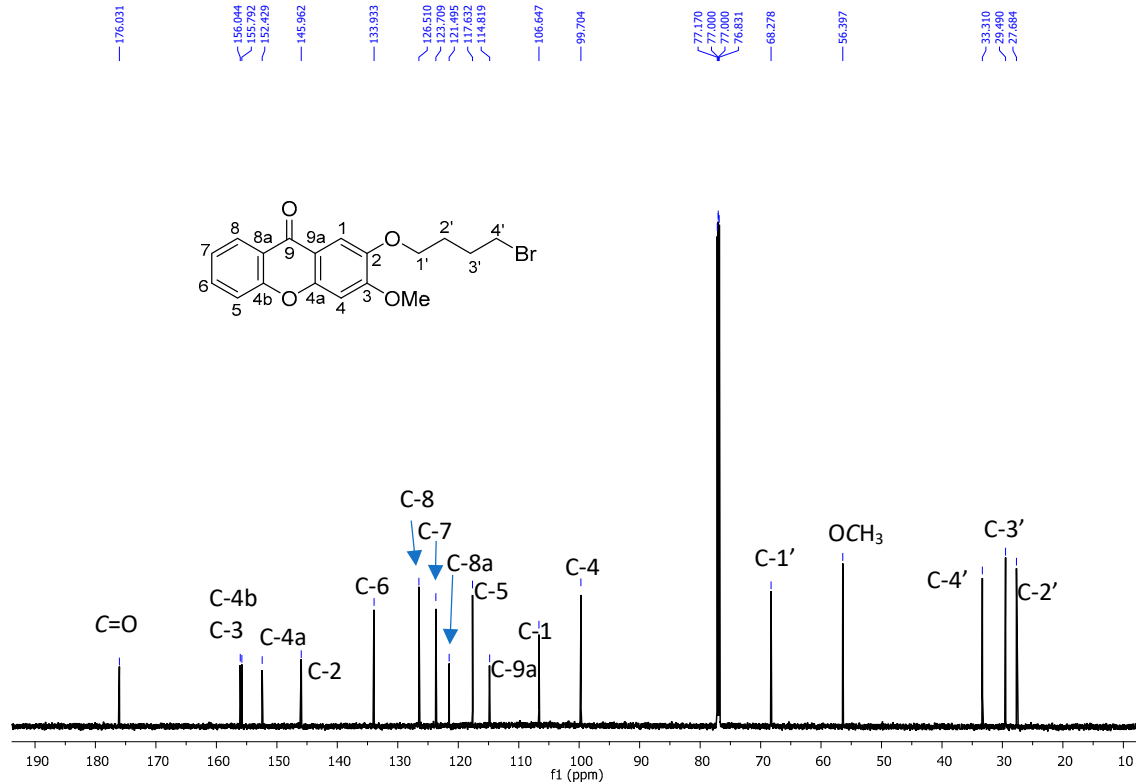

**Figure S34.**  $^{13}\text{C}$  NMR (187.5 MHz,  $\text{CDCl}_3$ ) spectrum of **9a**

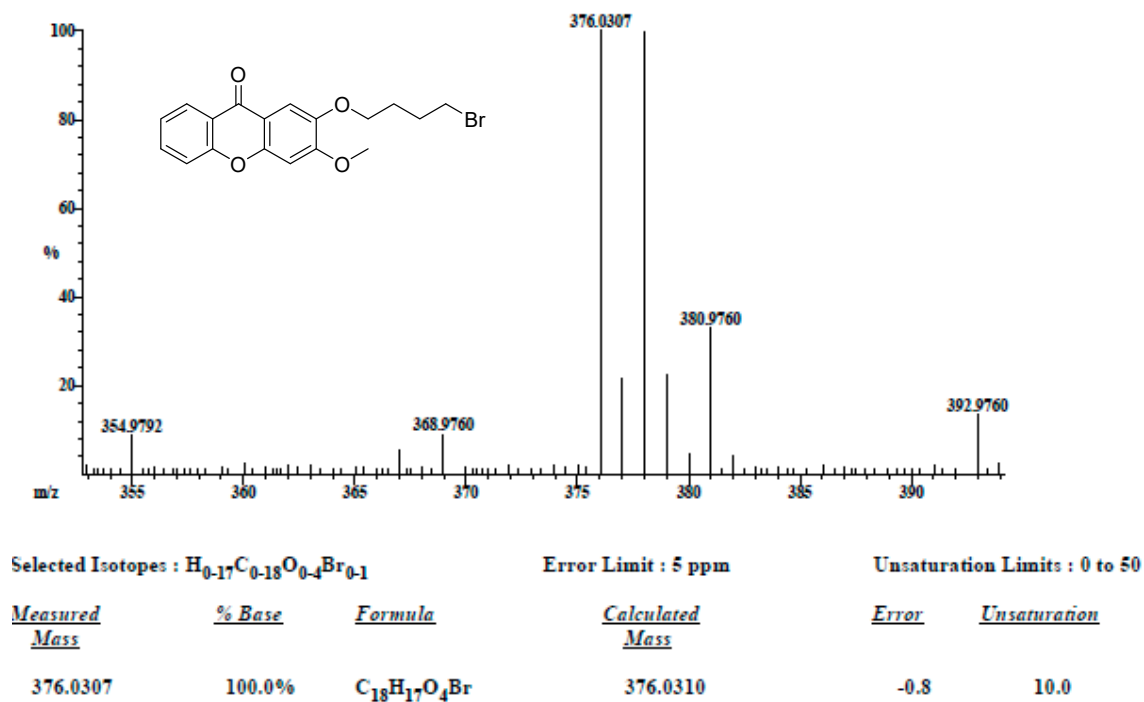

Figure S35. HRMS (EI) spectra of compound 9a.

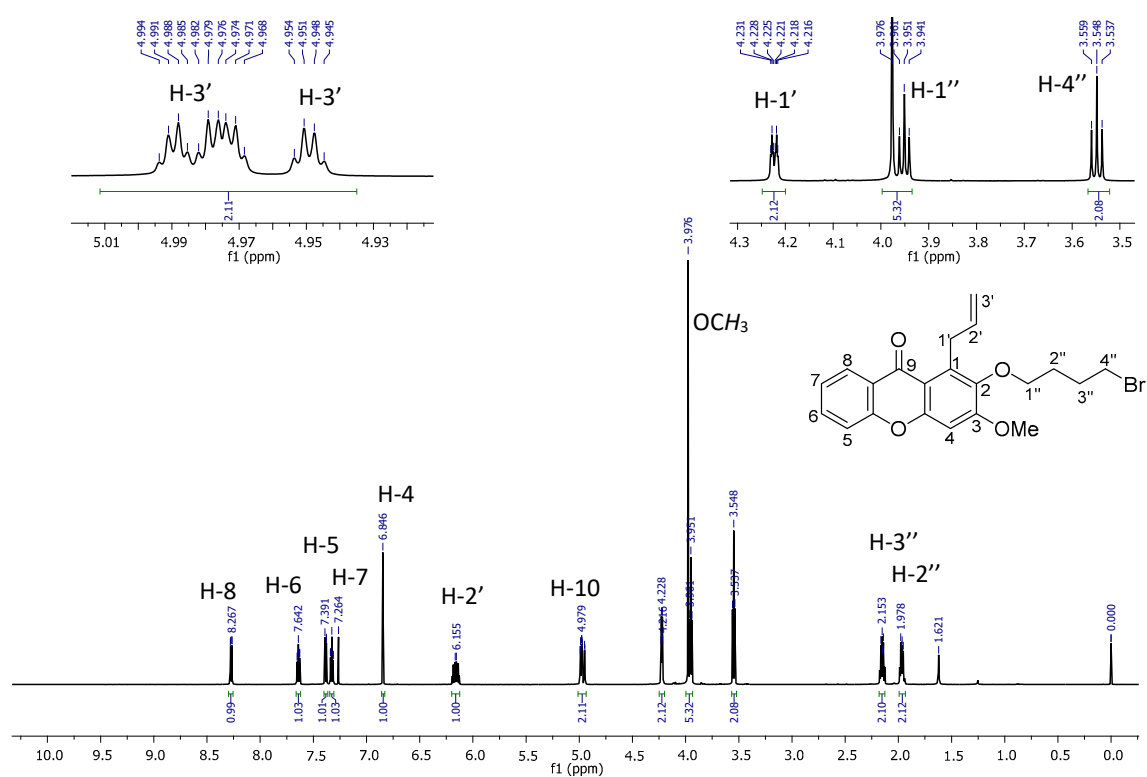

Figure S36.  $^1H$  NMR (600 MHz,  $CDCl_3$ ) spectrum of 9b.

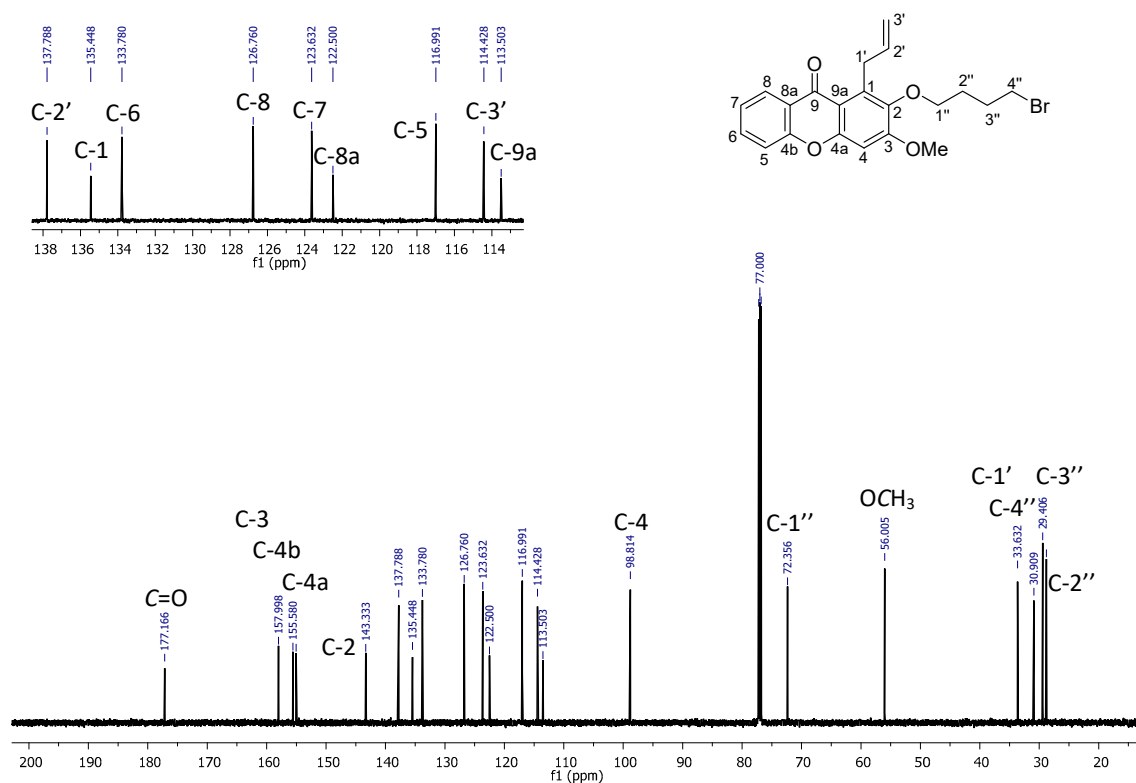

Figure S37. <sup>13</sup>C NMR (150 MHz, CDCl<sub>3</sub>) spectrum of **9b**.

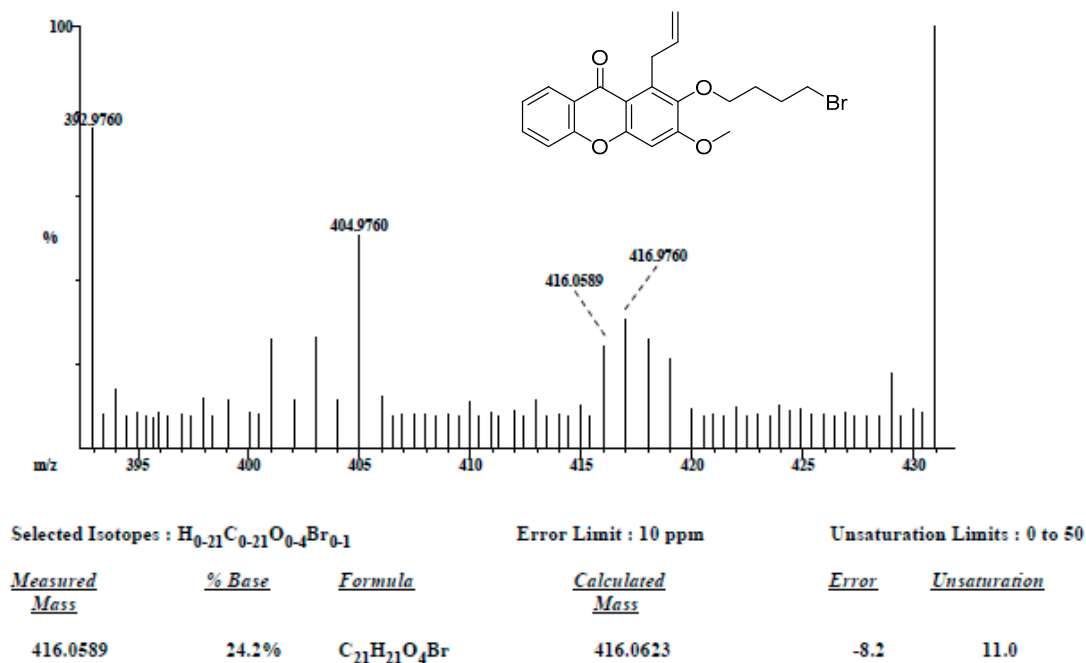

Figure S38. HRMS (EI) spectra of compound **9b**.

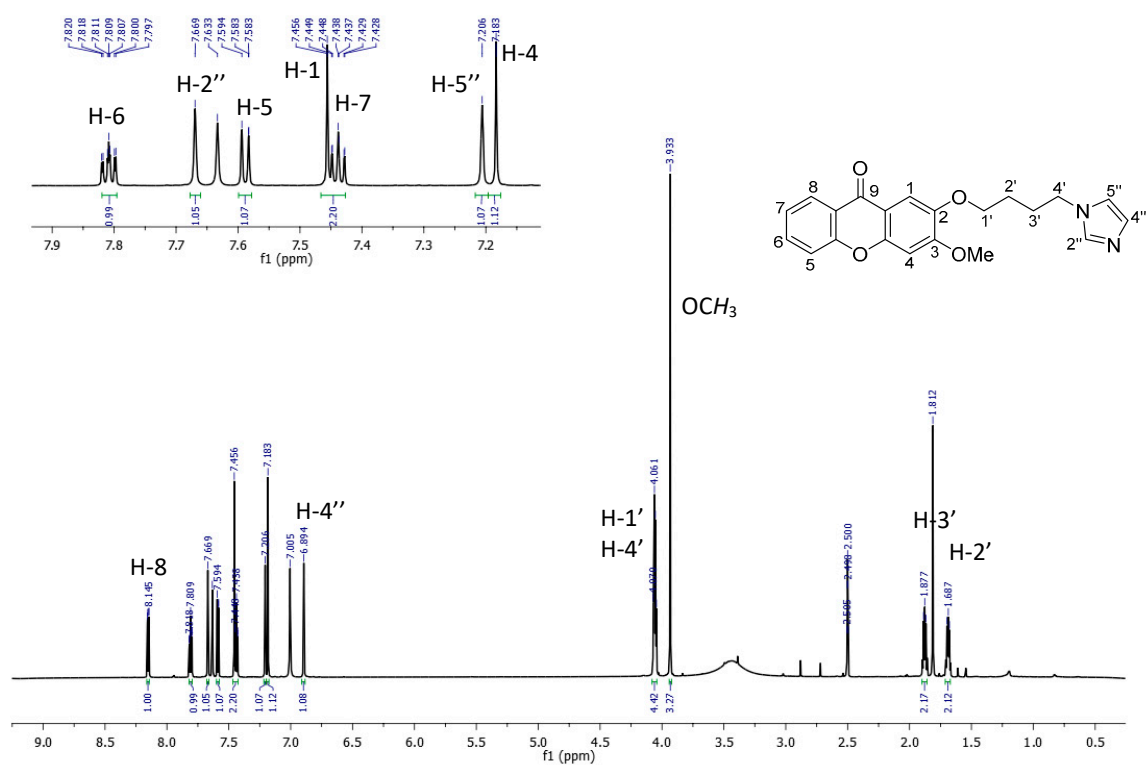

**Figure S39.**  $^1\text{H}$  NMR (750 MHz,  $\text{DMSO}-d_6$ ) spectrum of **10a**.

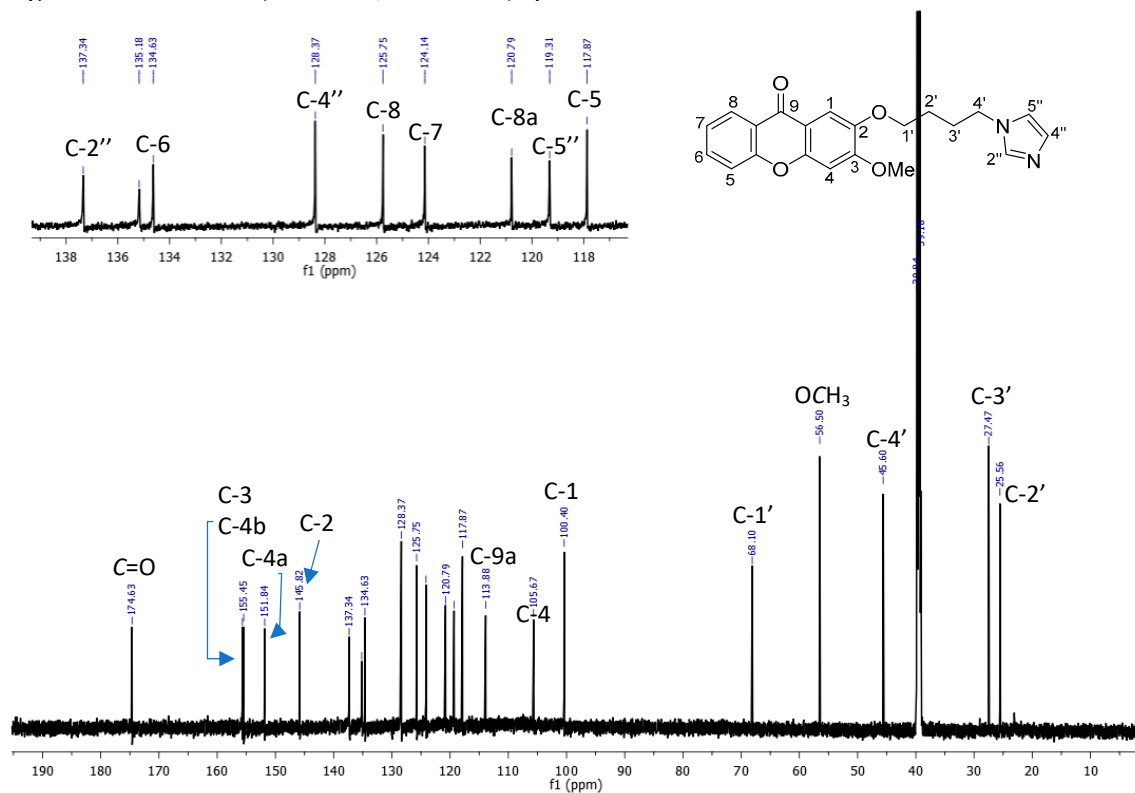

**Figure S40.**  $^{13}\text{C}$  NMR (187.5 MHz,  $\text{DMSO}-d_6$ ) spectrum of **10a**.

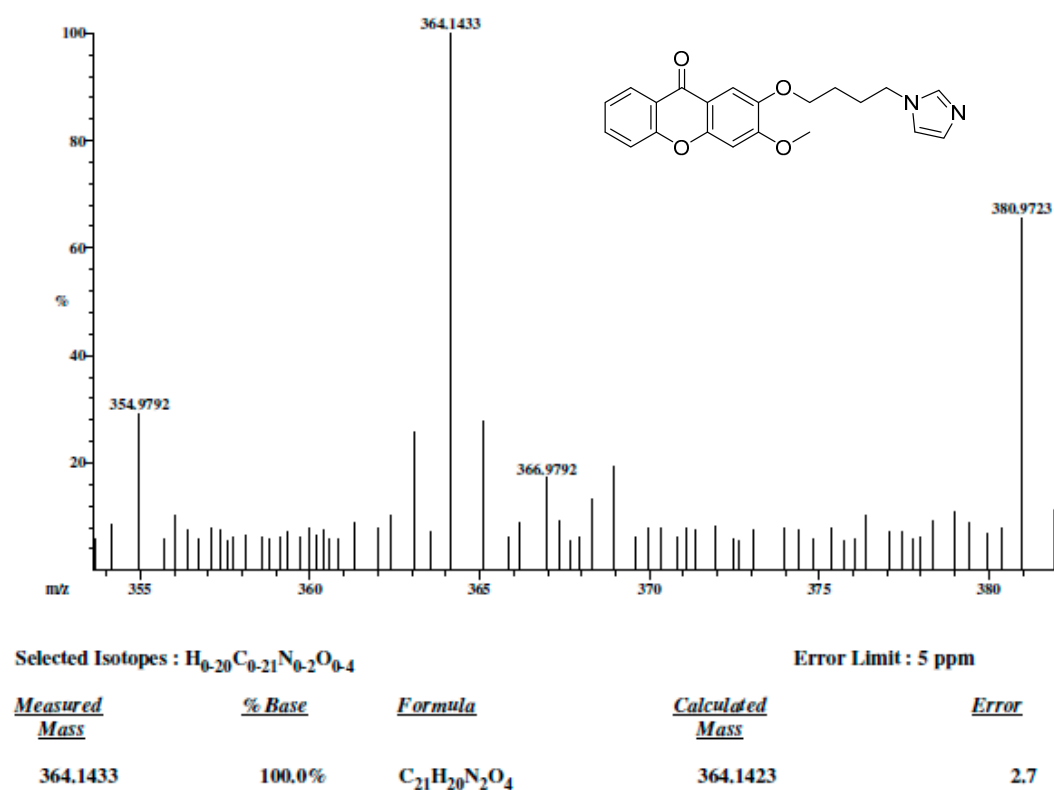

Figure S41. HRMS (EI) spectra of compound 10a.

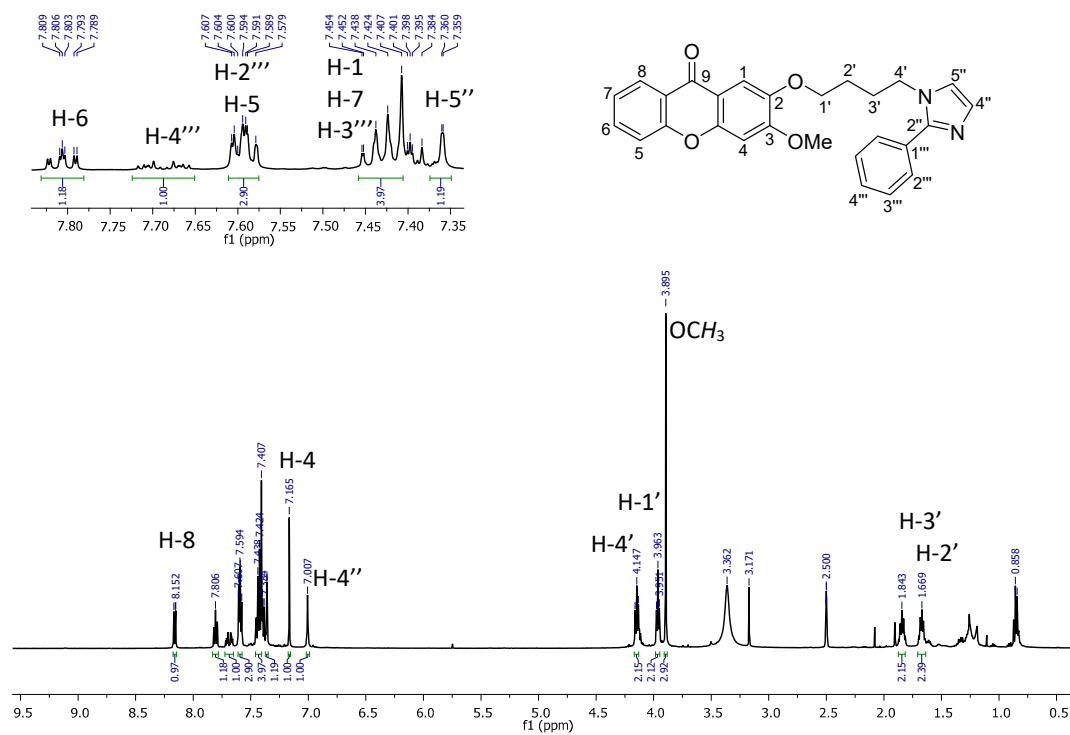

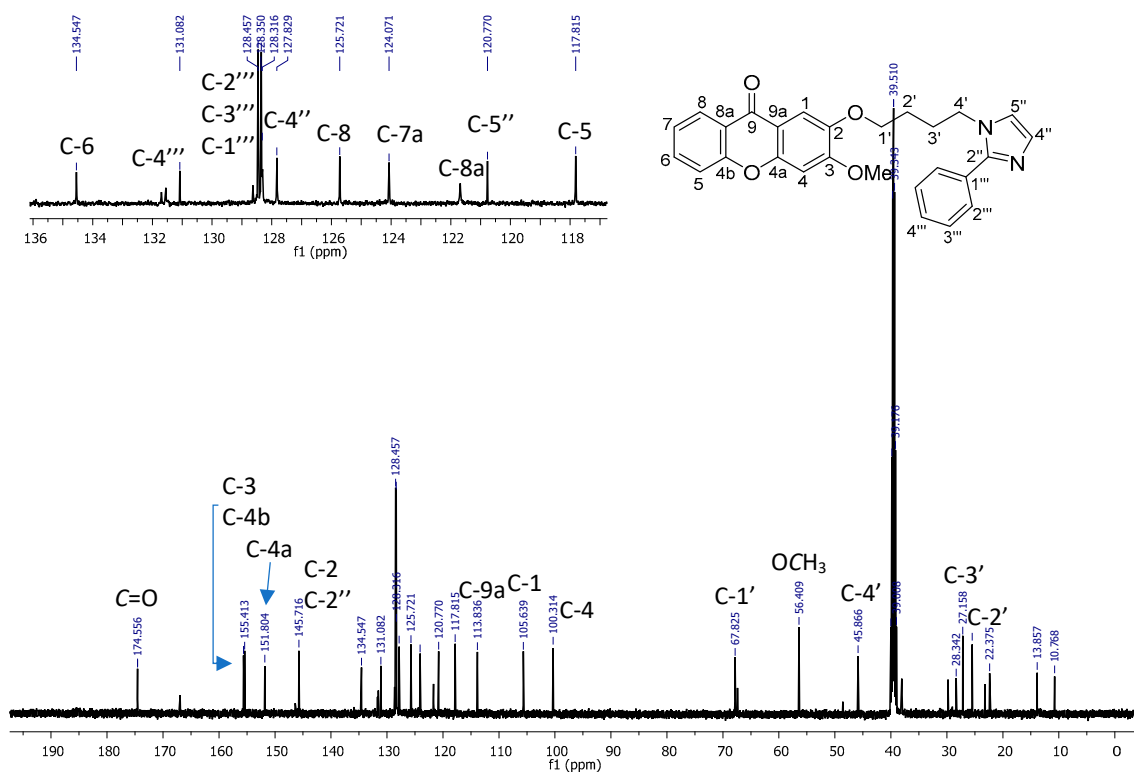

Figure S43. <sup>13</sup>C NMR (125 MHz, DMSO-*d*<sub>6</sub>) spectrum of **10b**.

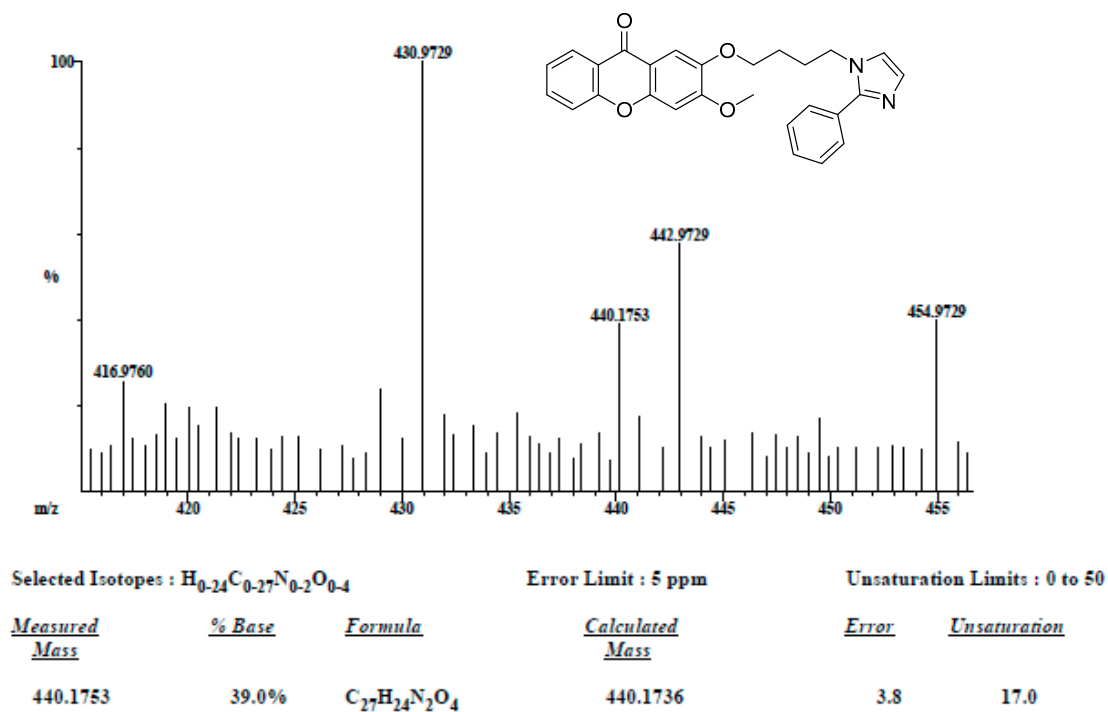

Figure S44. HRMS (EI) spectra of compound **10b**.

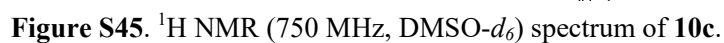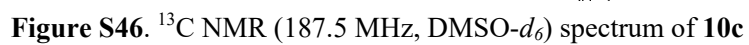



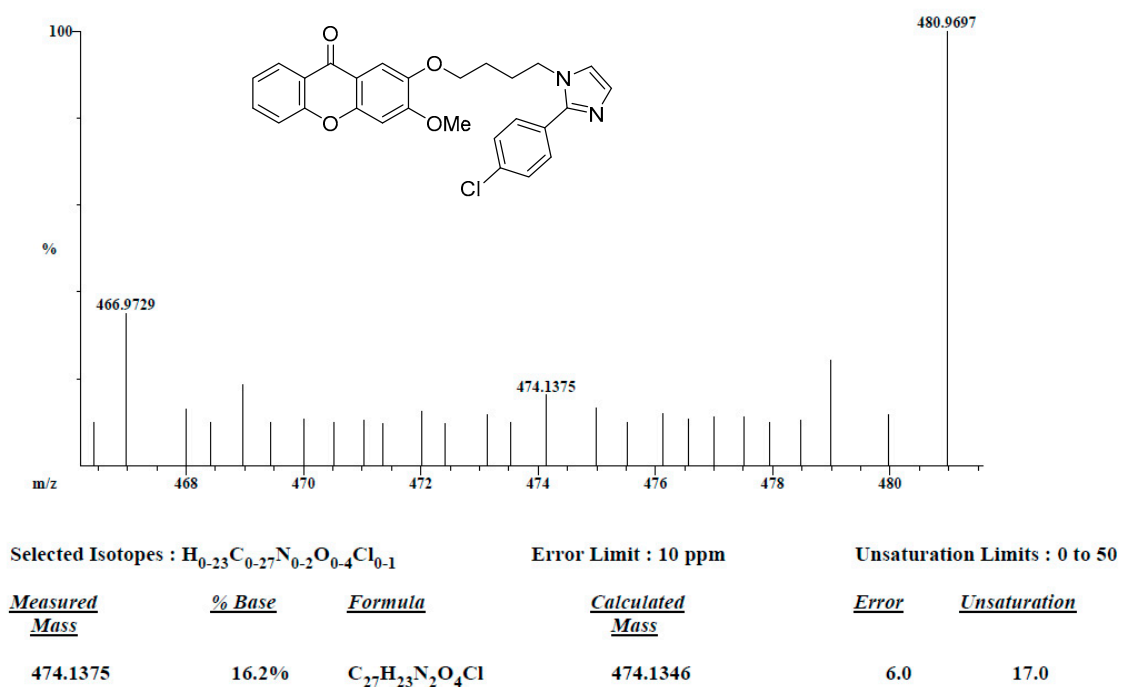

Figure S47. HRMS (EI) spectra of compound 10c.

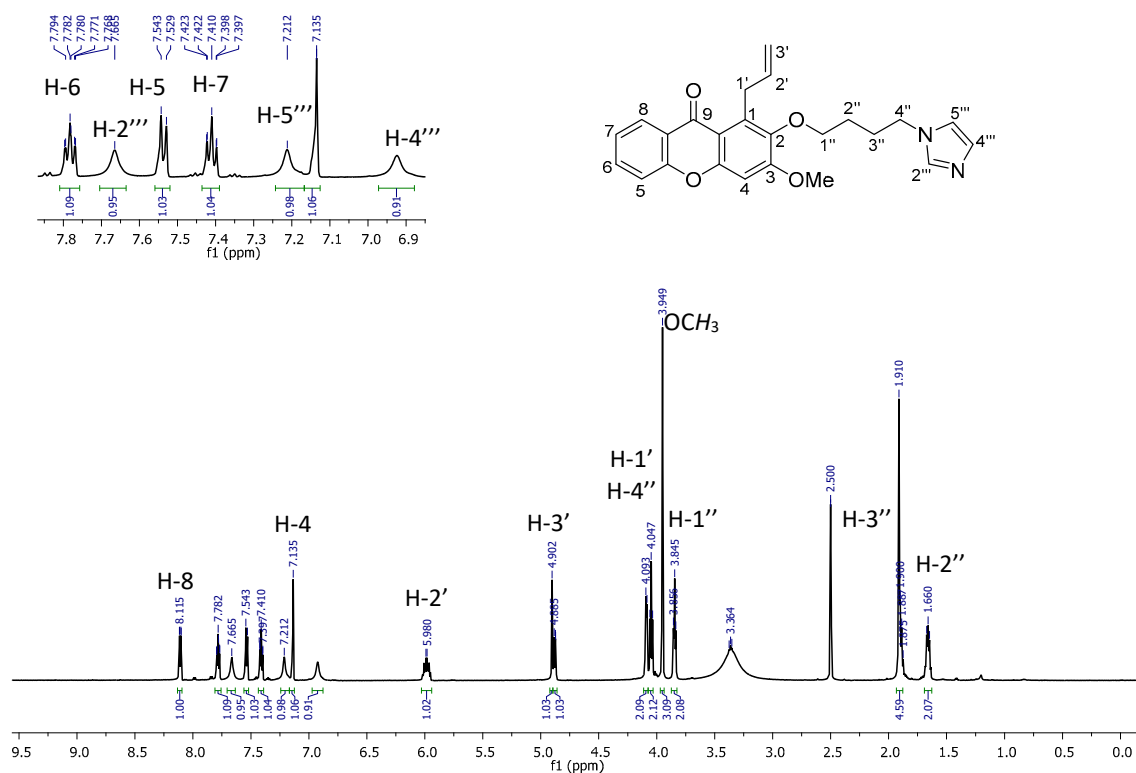

Figure S48.  $^1\text{H}$  NMR (600 MHz,  $\text{DMSO}-d_6$ ) spectrum of 10d.

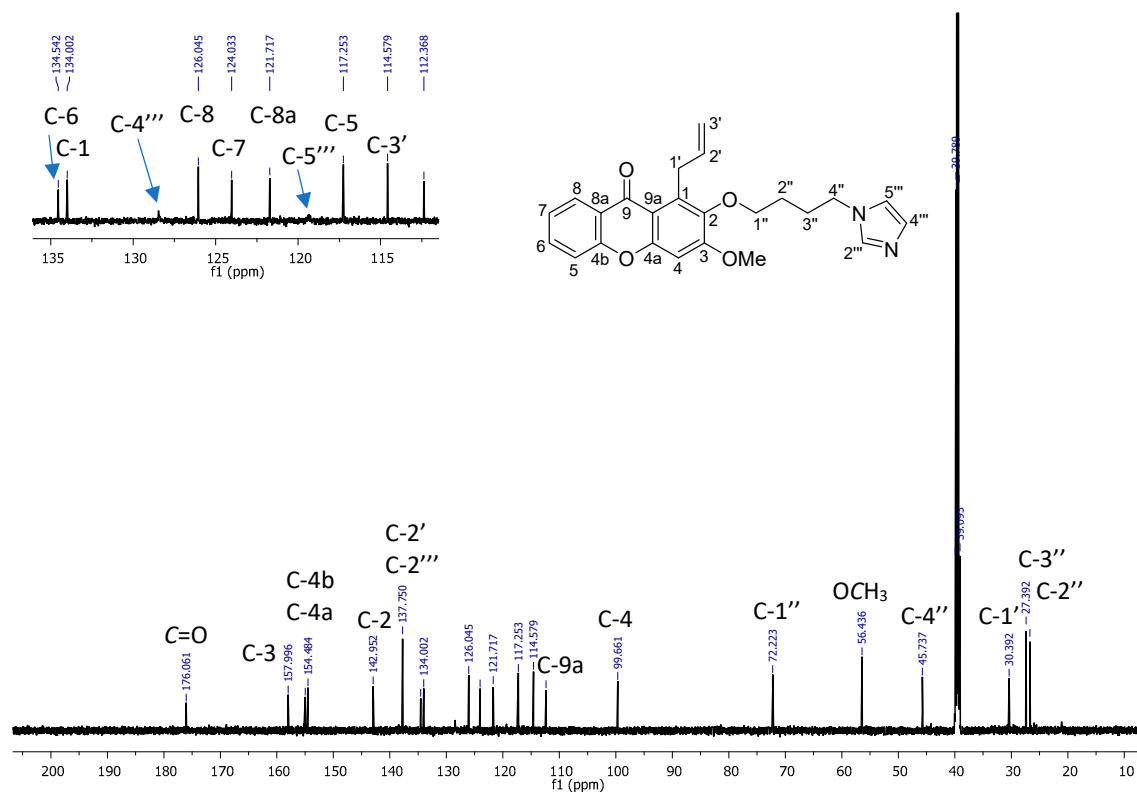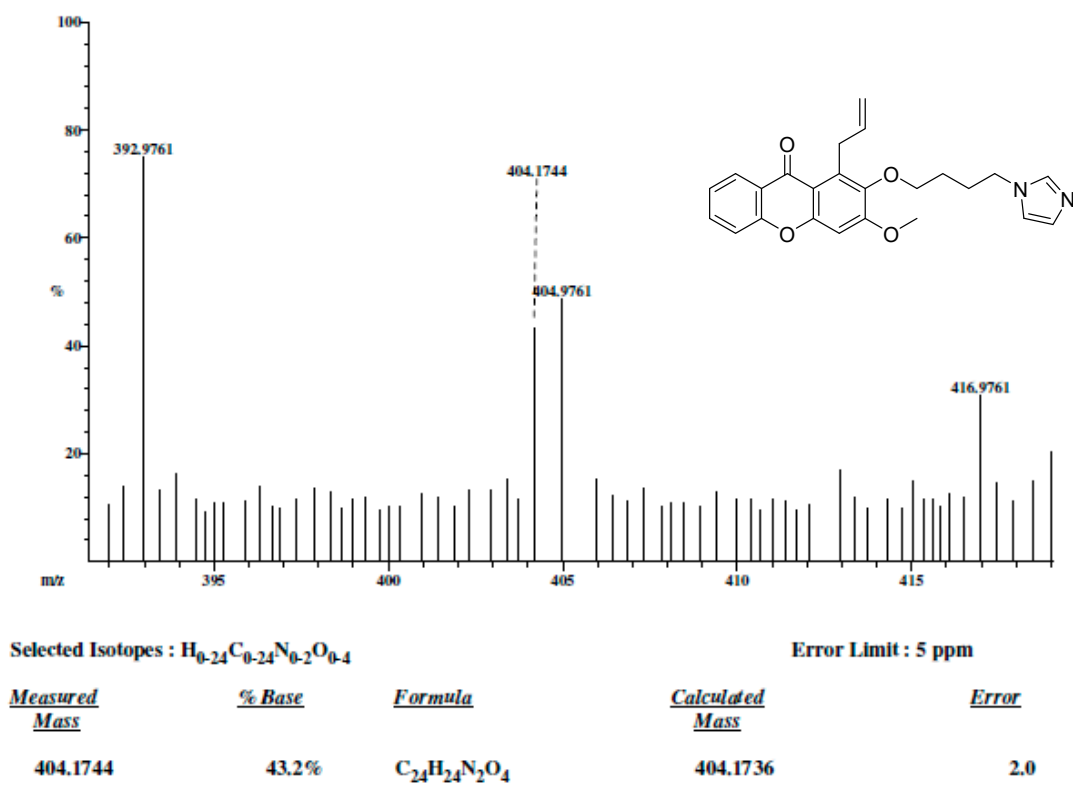

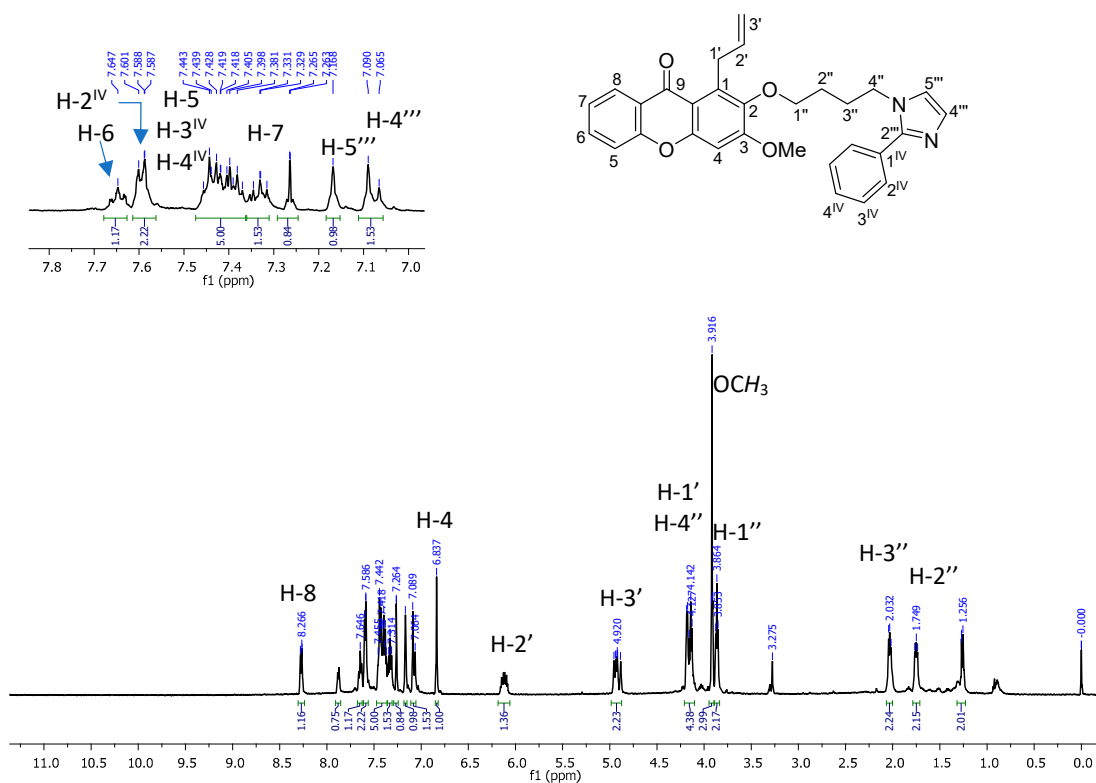

Figure S51  $^1\text{H}$  NMR (500 MHz,  $\text{CDCl}_3$ ) spectrum of 10e.

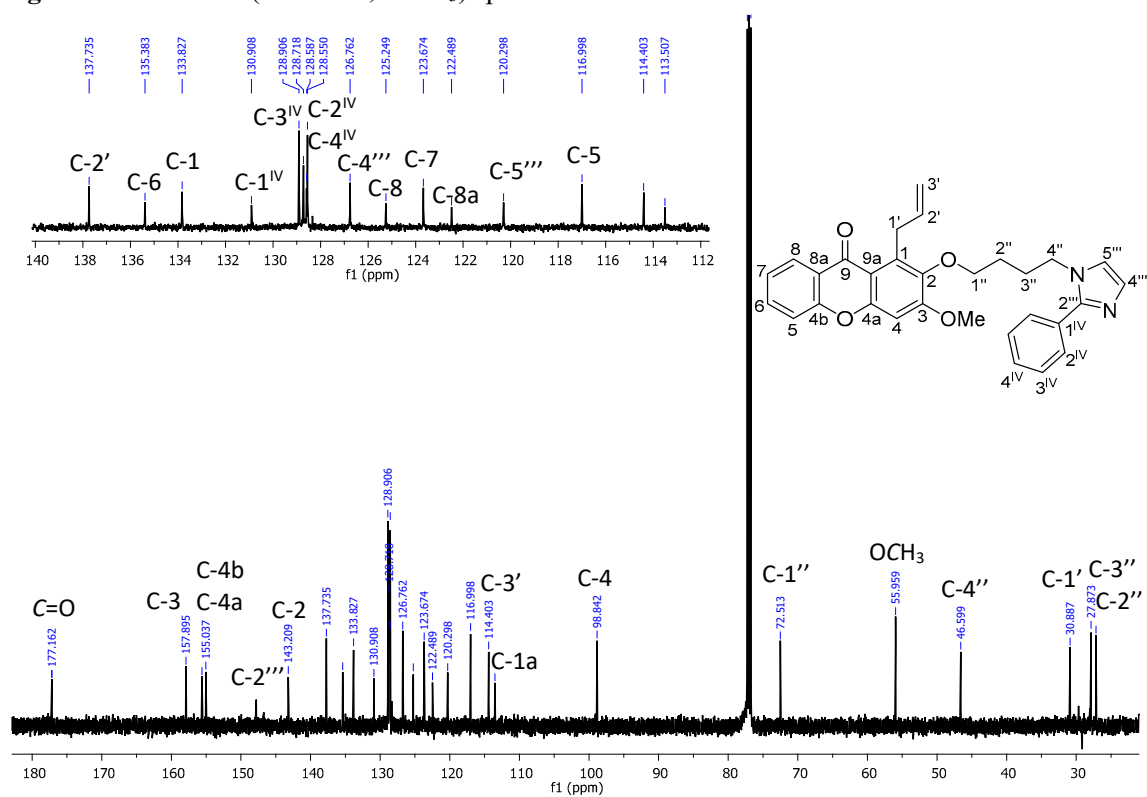

Figure S52.  $^{13}\text{C}$  NMR (125 MHz,  $\text{CDCl}_3$ ) spectrum of 10e.

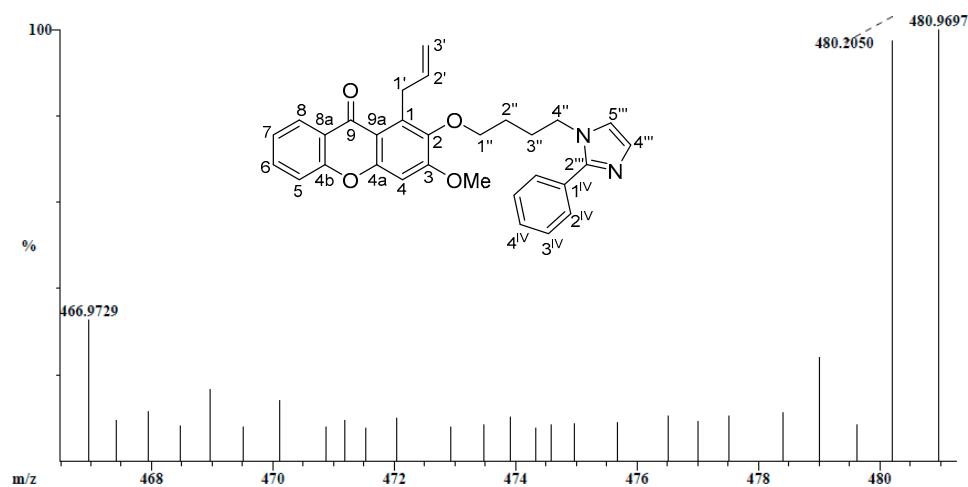

Selected Isotopes :  $\text{H}_{0-28}\text{C}_{0-30}\text{N}_{0-2}\text{O}_{0-4}$

Error Limit : 5 ppm

Unsaturation Limits : 0 to 50

| <u>Measured</u><br><u>Mass</u> | <u>% Base</u> | <u>Formula</u>                                   | <u>Calculated</u><br><u>Mass</u> | <u>Error</u> | <u>Unsaturation</u> |
|--------------------------------|---------------|--------------------------------------------------|----------------------------------|--------------|---------------------|
| 480.2050                       | 97.4%         | $\text{C}_{30}\text{H}_{28}\text{N}_2\text{O}_4$ | 480.2049                         | 0.2          | 18.0                |

Figure S53. HRMS (EI) spectra of compound 10e.

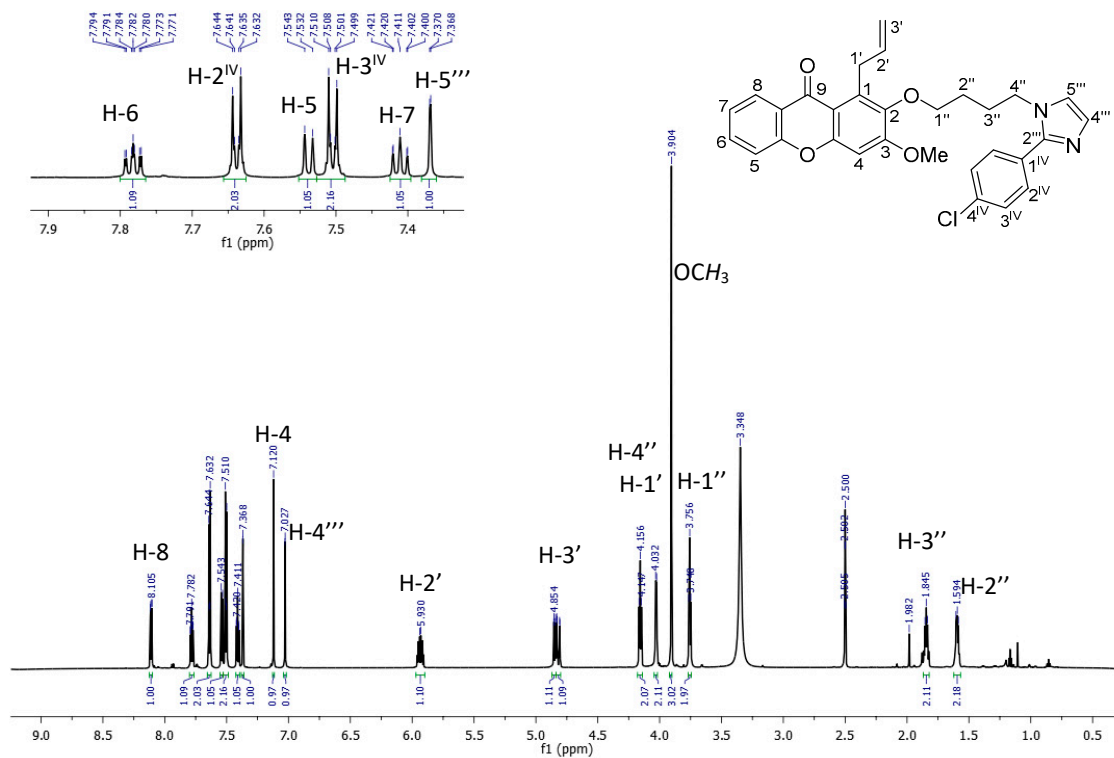

Figure S54.  $^1\text{H}$  NMR (750 MHz,  $\text{DMSO}-d_6$ ) spectrum of 10f.

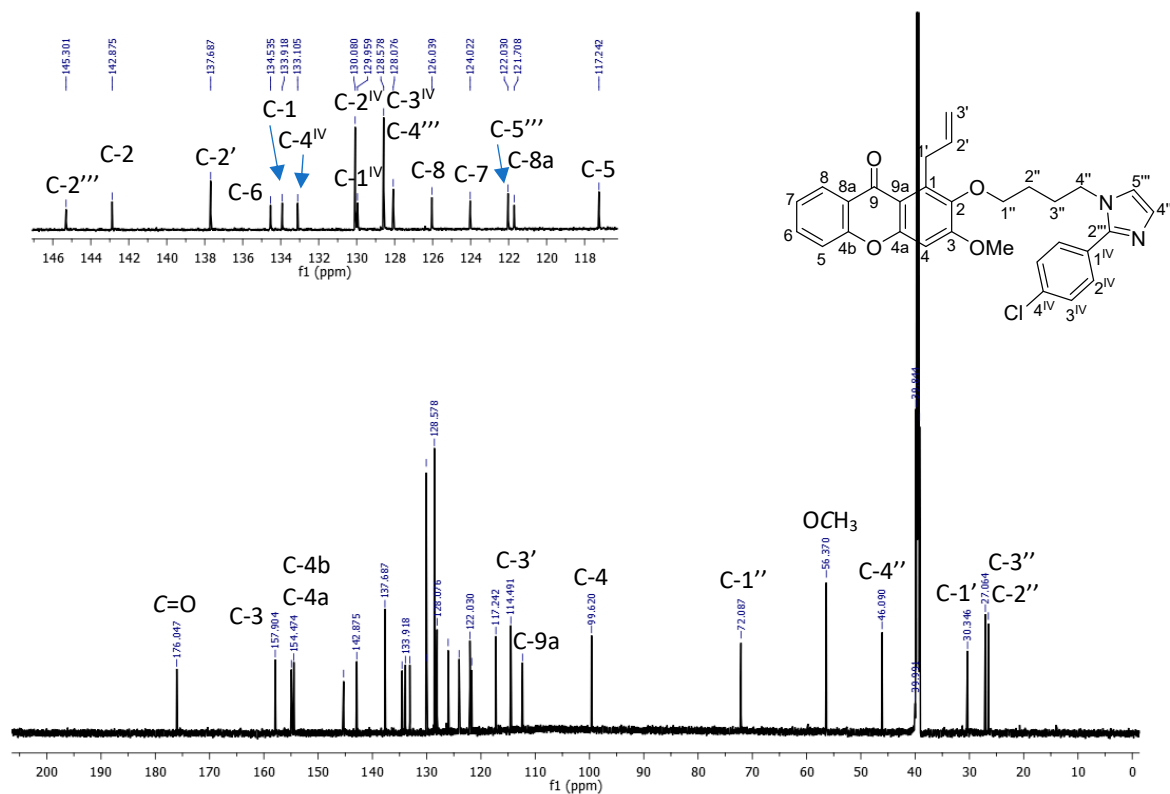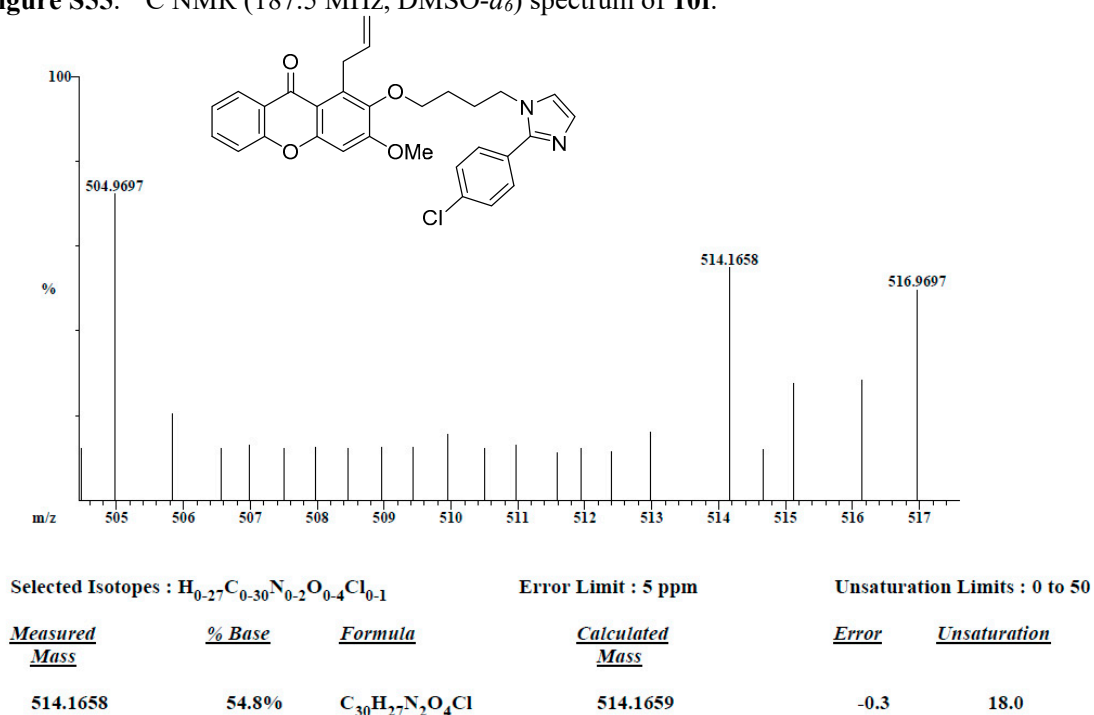

Figure S56. HRMS (EI) spectra of compound **10f**.

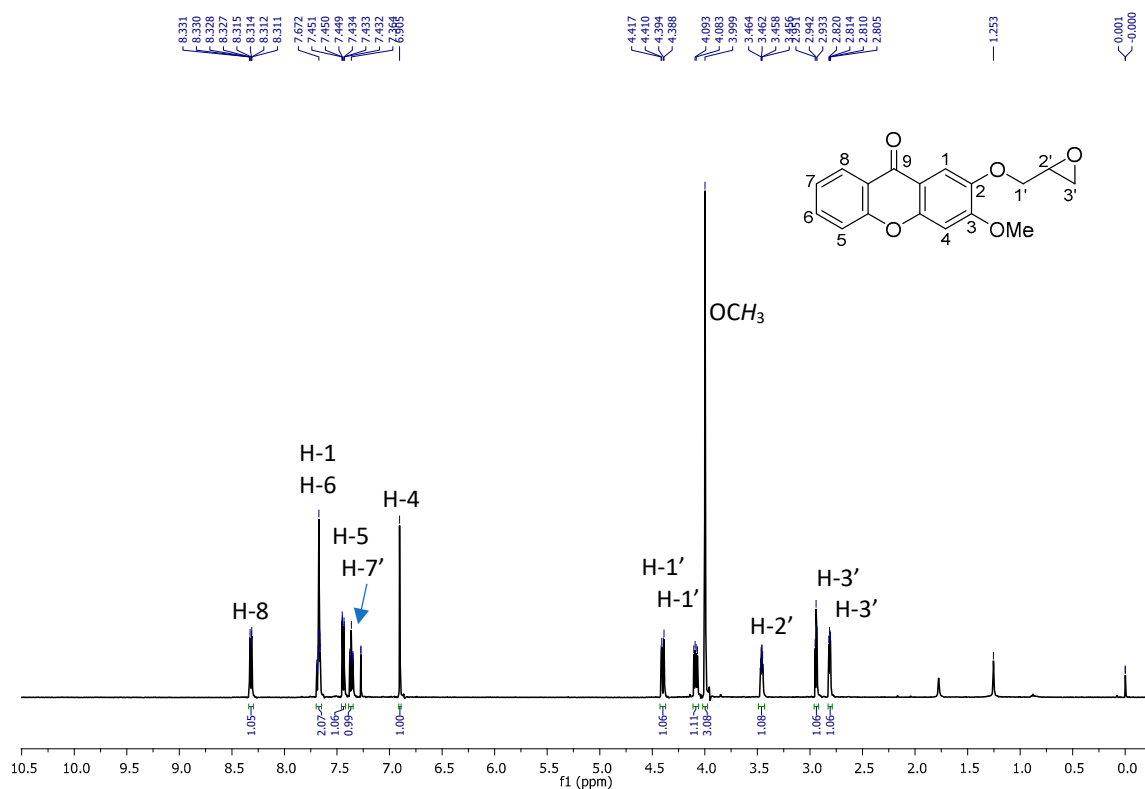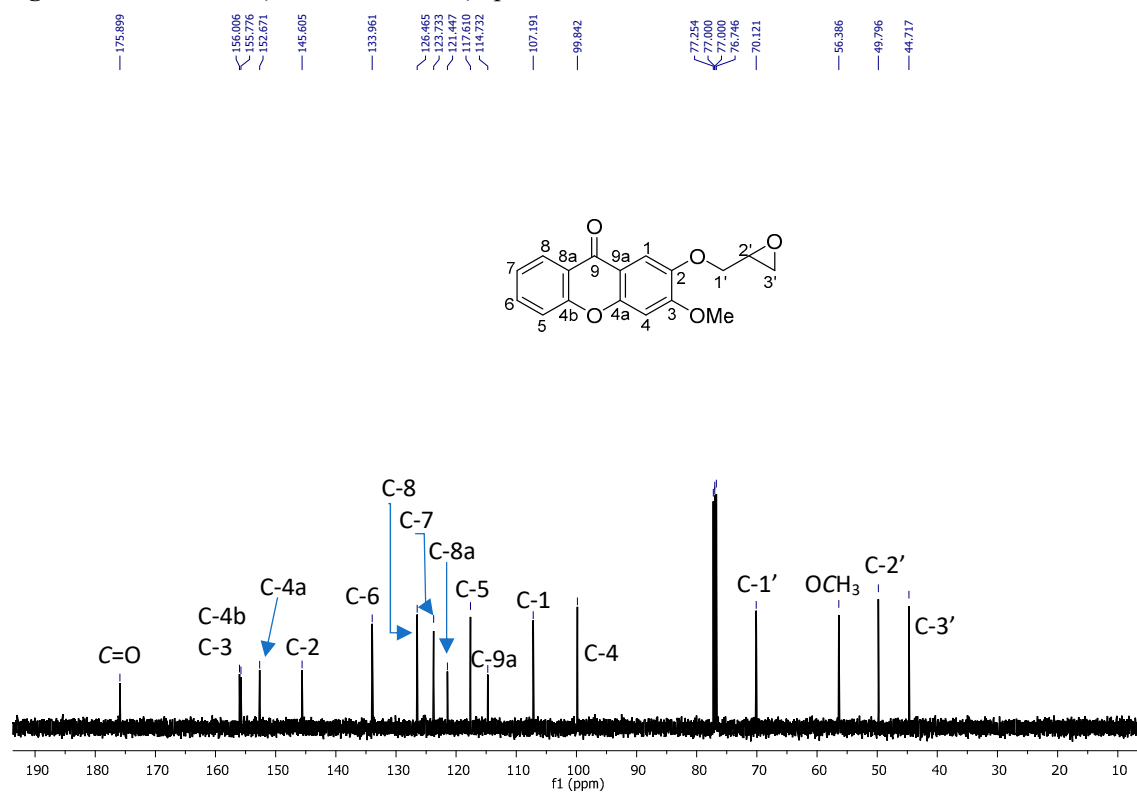

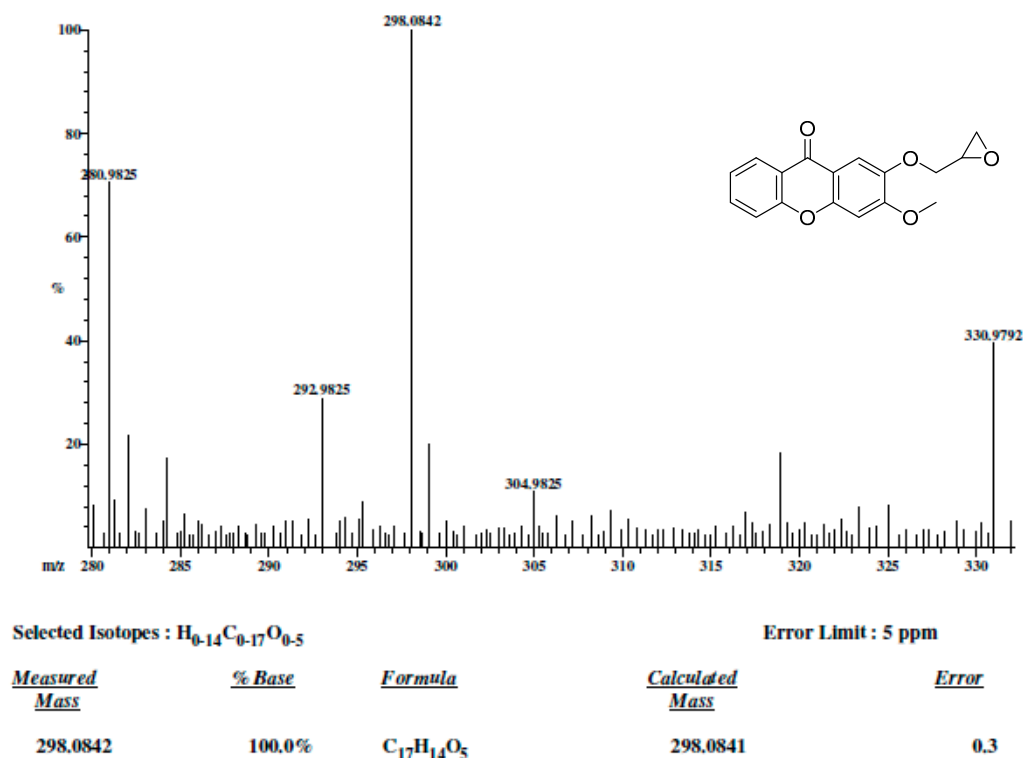

Figure S59. HRMS (EI) spectra of compound **11a**.

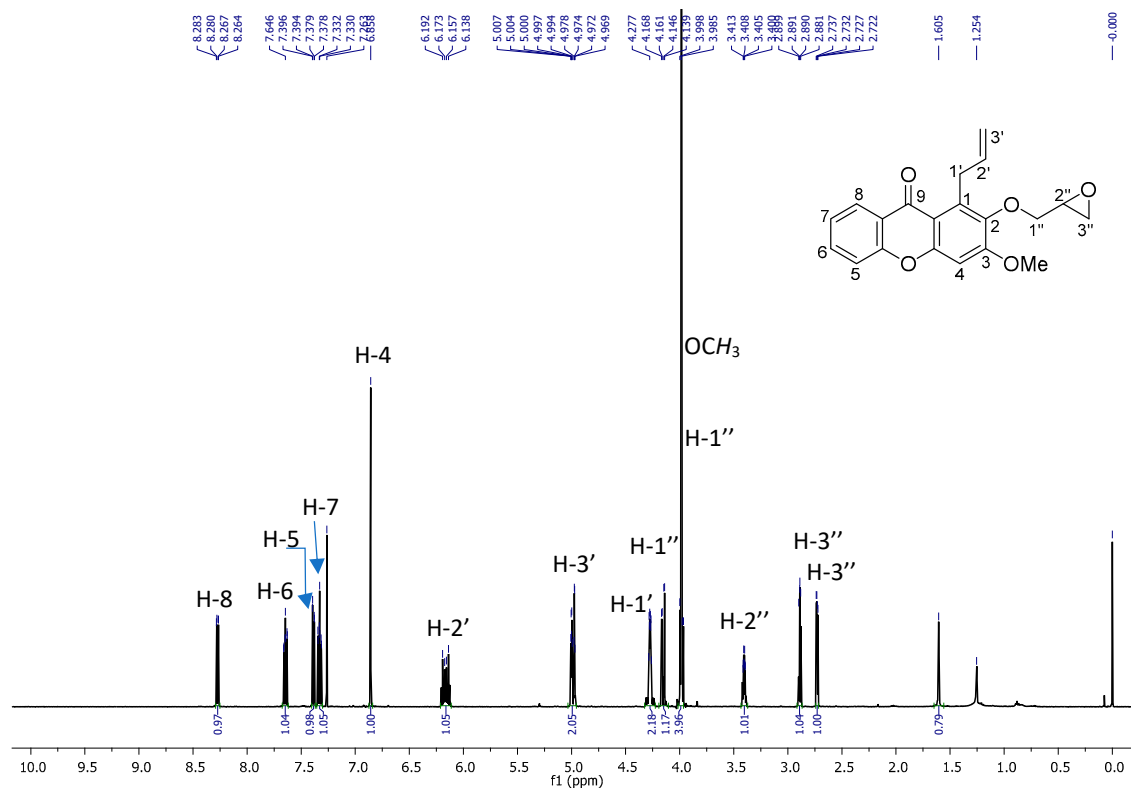

Figure S60.  $^1H$  NMR (500 MHz,  $CDCl_3$ ) spectrum of **11b**.

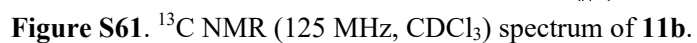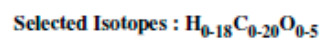

**Error Limit : 5 ppm**

**Figure S62.** HRMS (EI) spectra of compound **11b**.



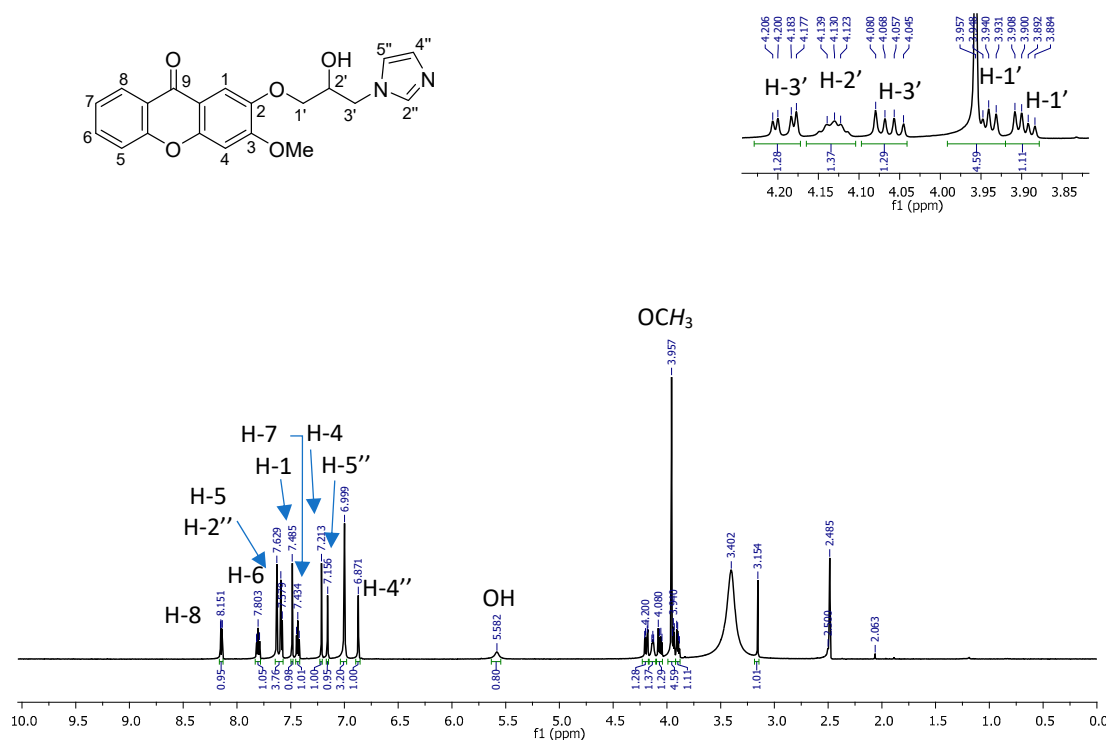

Figure S63.  $^1\text{H}$  NMR (600 MHz,  $\text{DMSO}-d_6$ ) spectrum of **12a**.

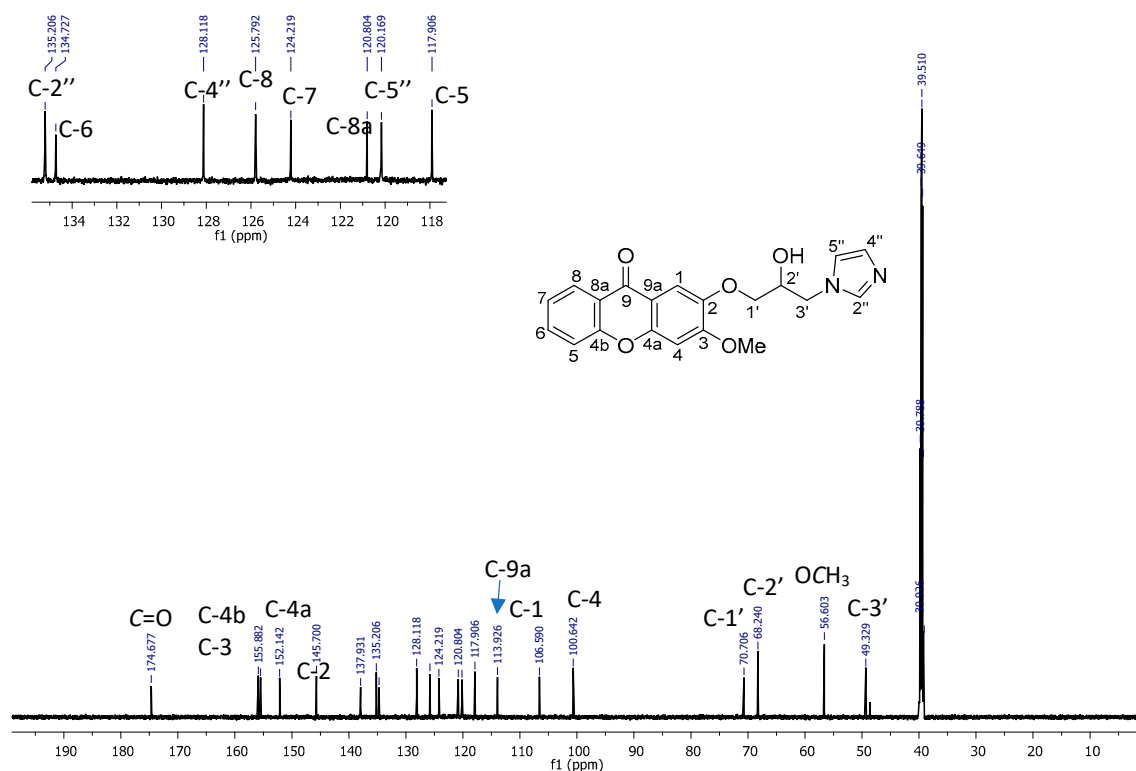

Figure S64.  $^{13}\text{C}$  NMR (150 MHz,  $\text{DMSO}-d_6$ ) spectrum of **12a**.

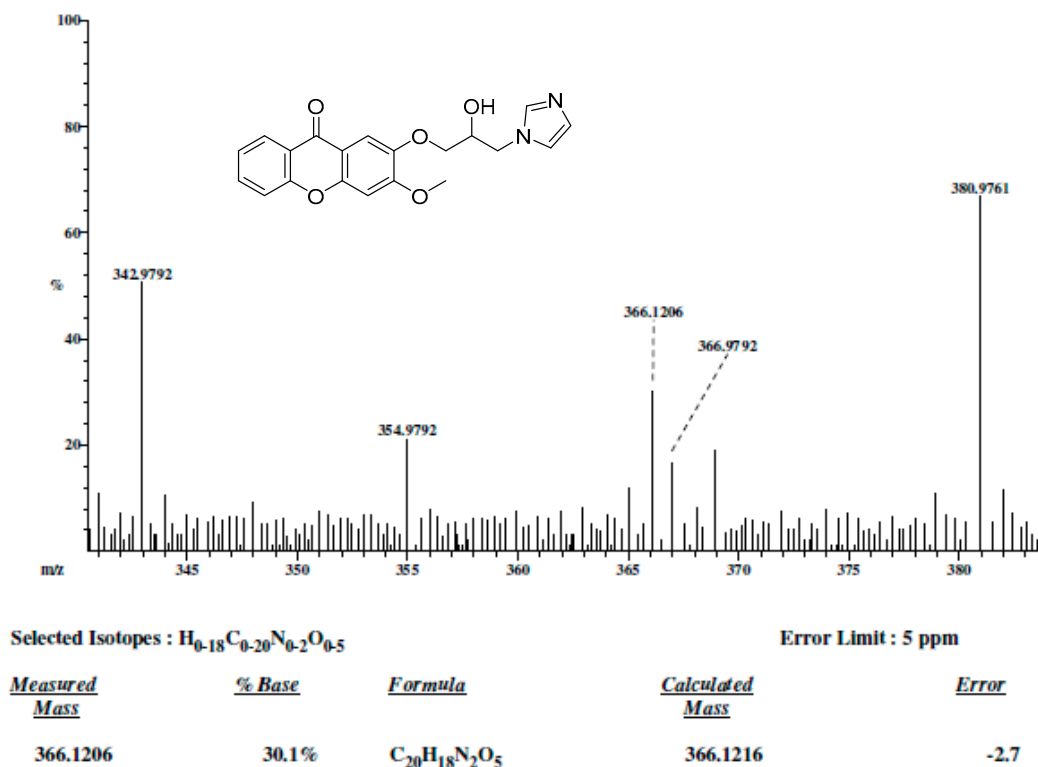

Figure S65. HRMS (EI) spectra of compound 12a.

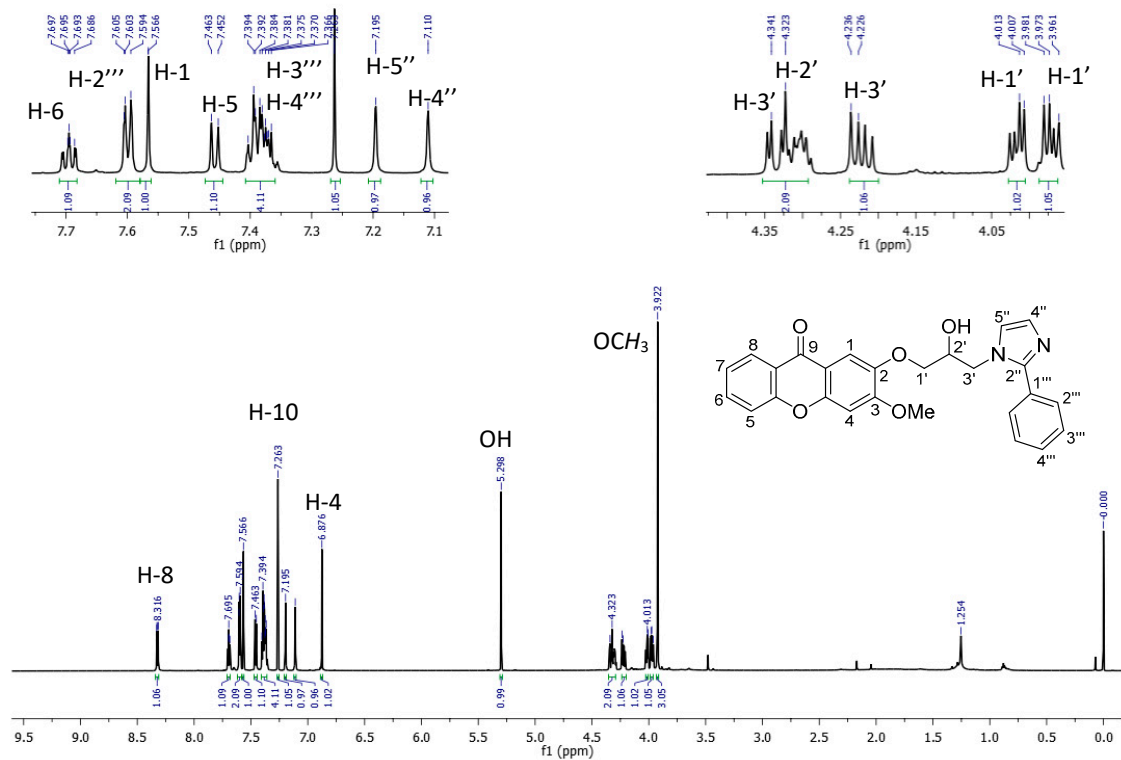

Figure S66.  $^1H$  NMR (750 MHz,  $CDCl_3$ ) spectrum of 12b.

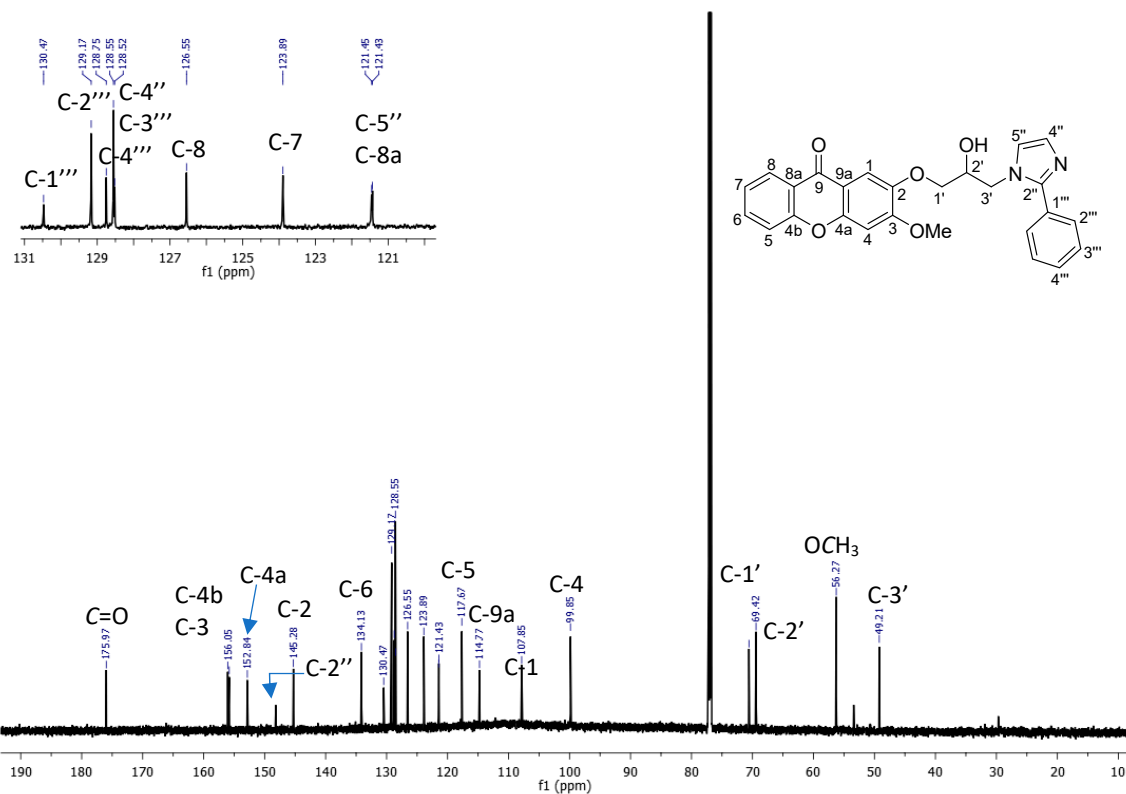

Figure S67.  $^{13}\text{C}$  NMR (187.5 MHz,  $\text{CDCl}_3$ ) spectrum of **12b**

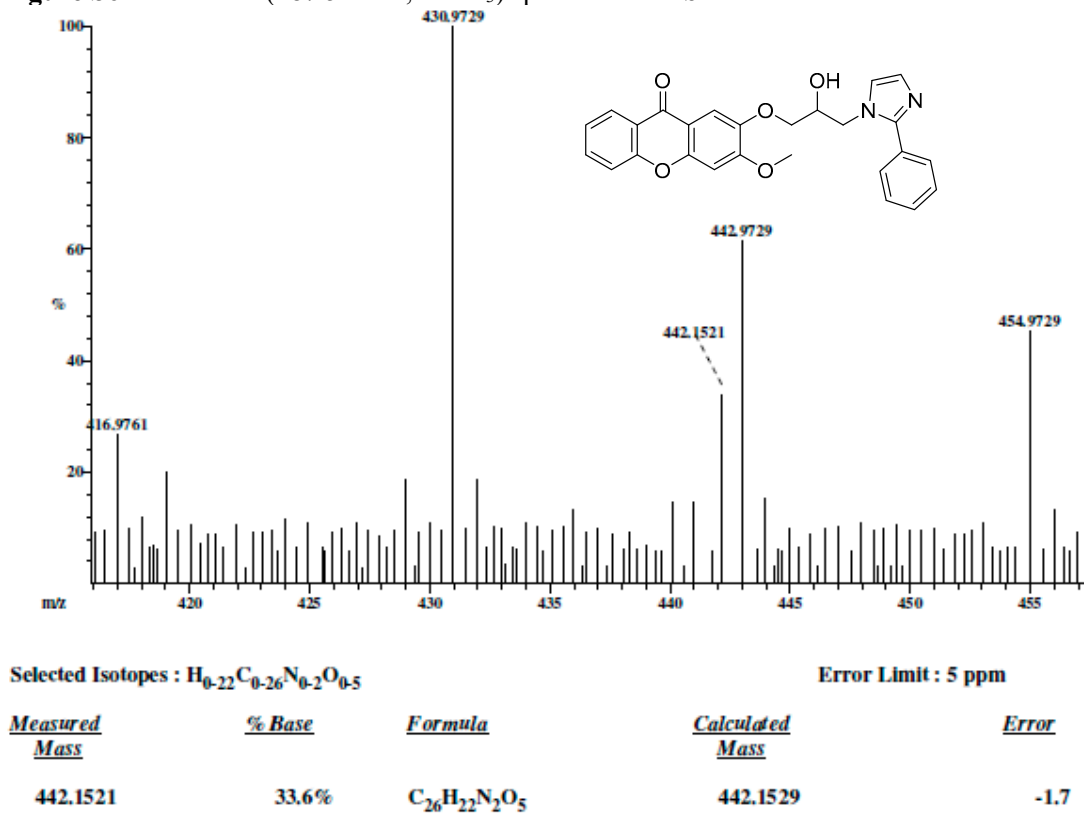

Figure S68. HRMS (EI) spectra of compound **12b**.

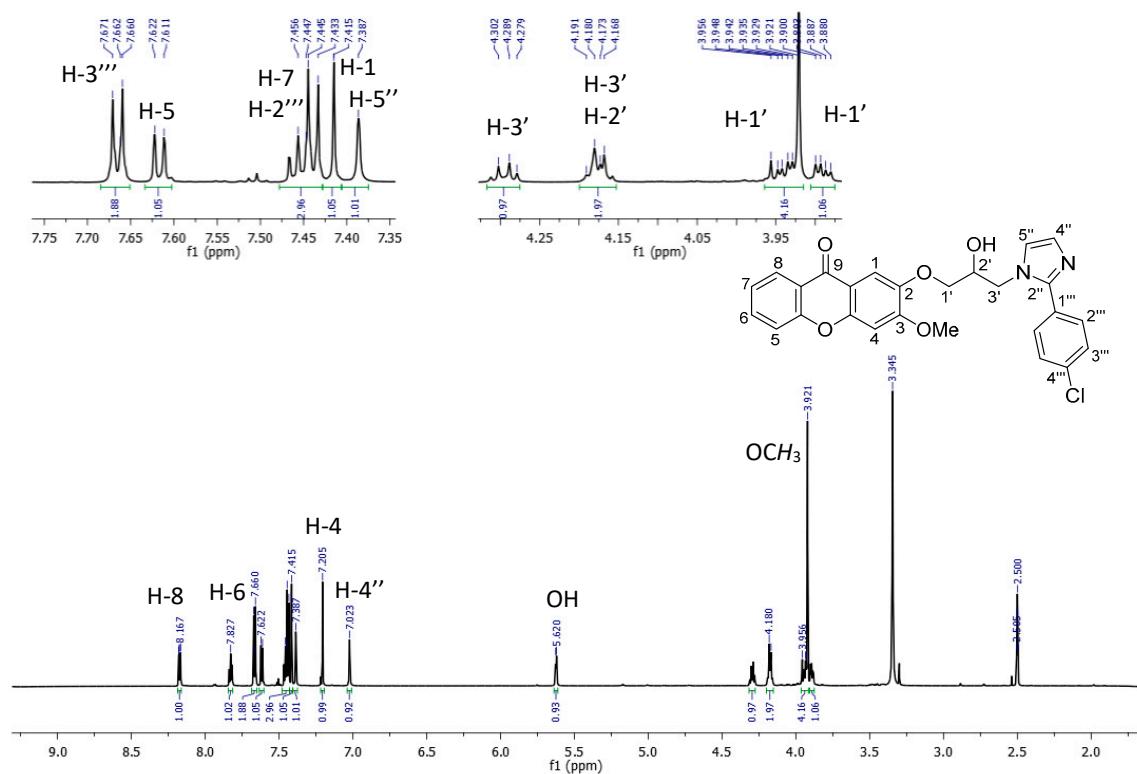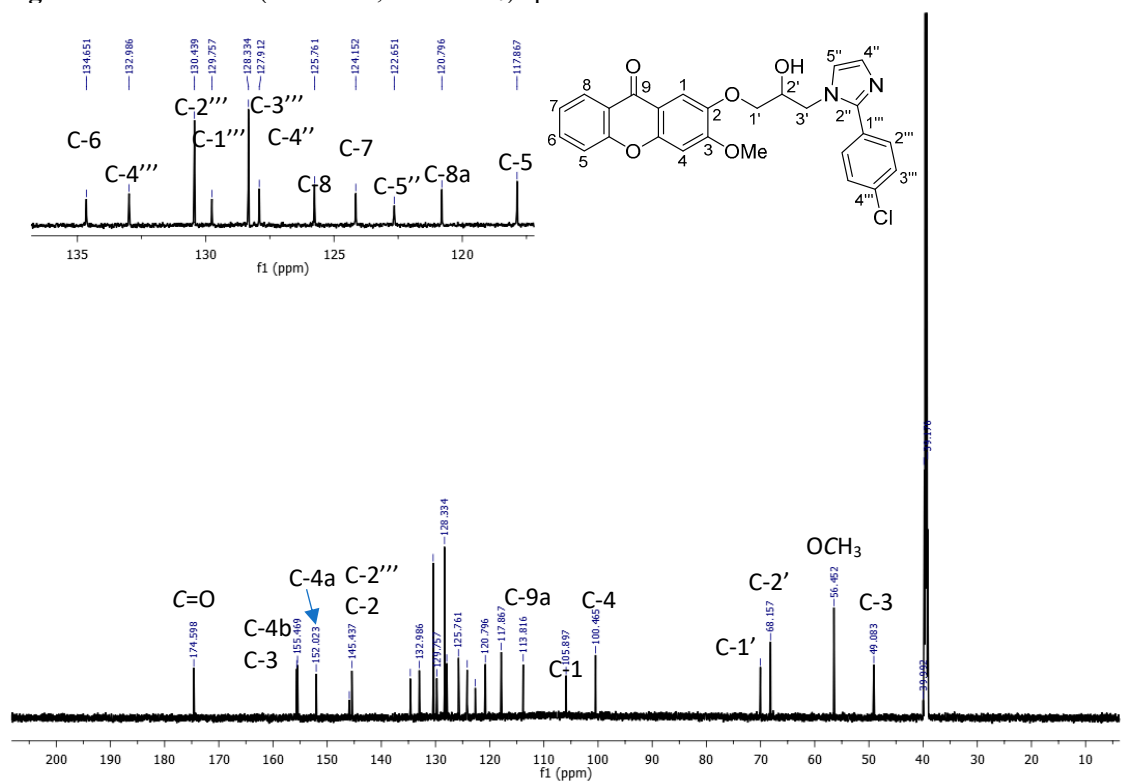

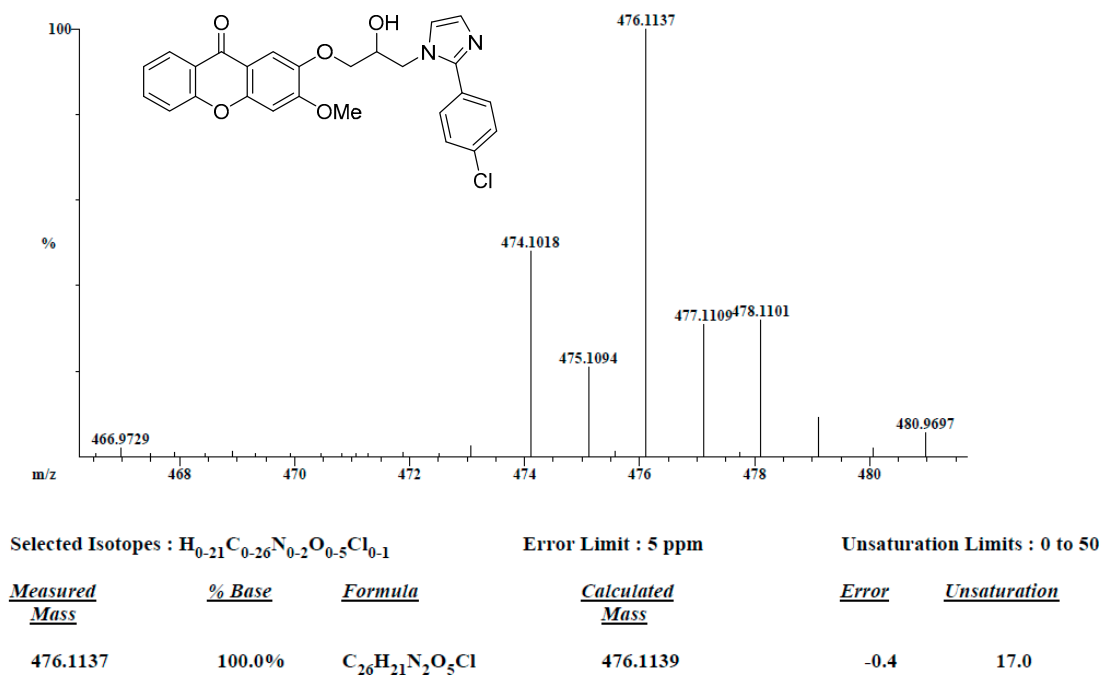

Figure S71. HRMS (EI) spectra of compound 12c.

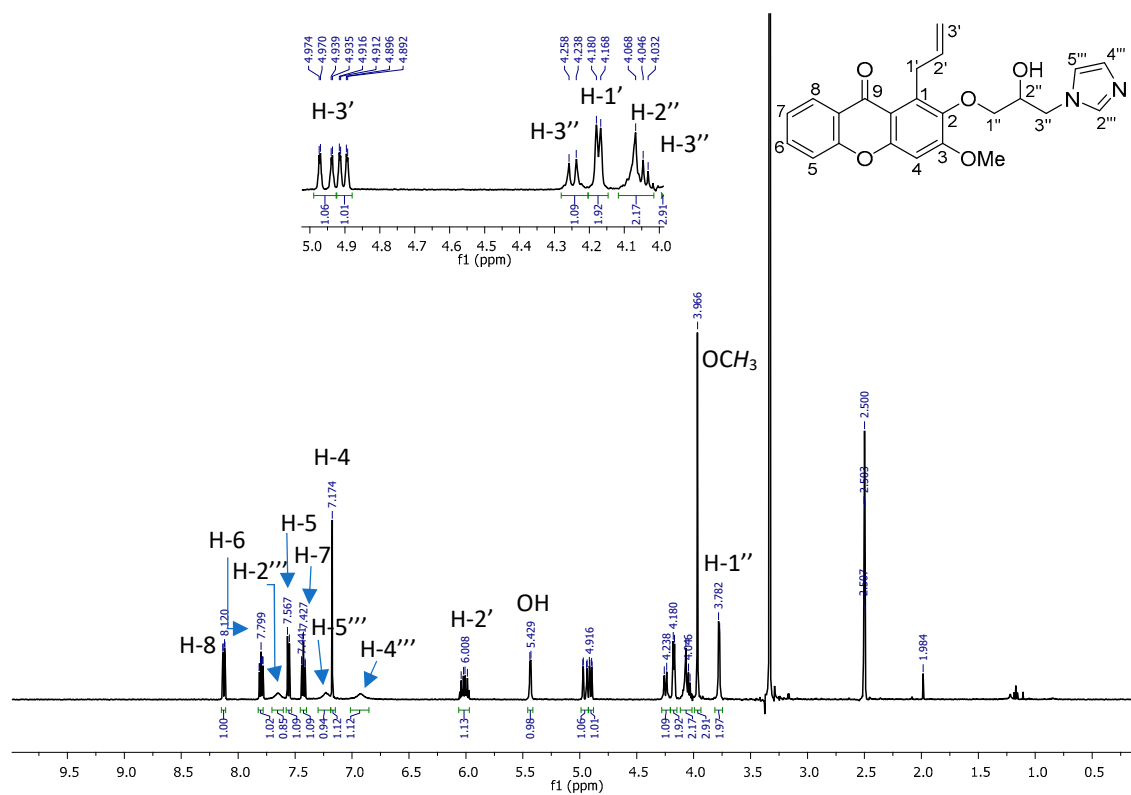

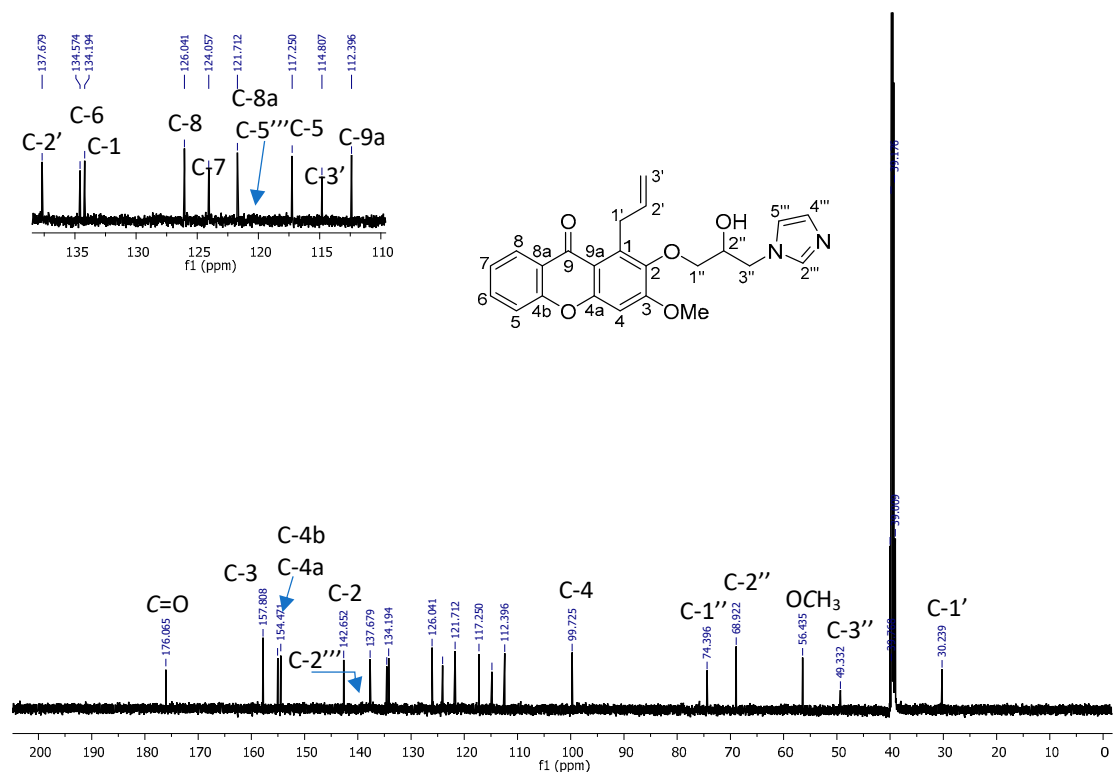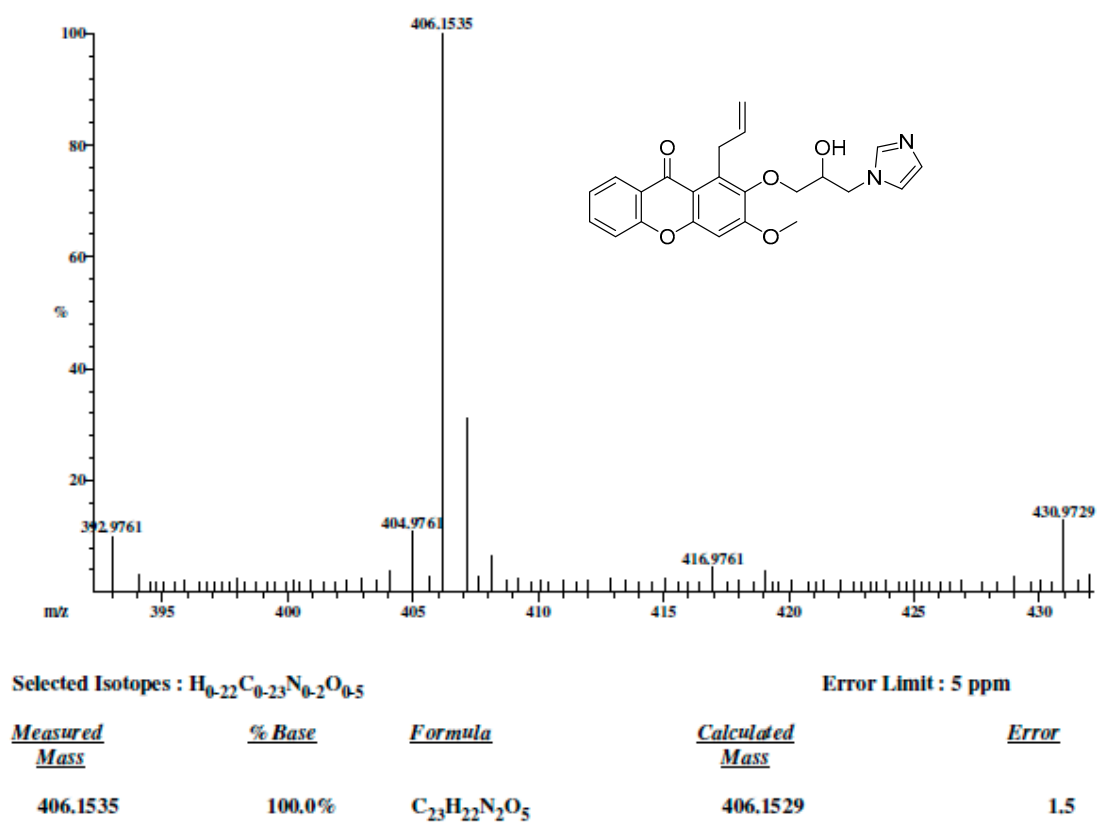

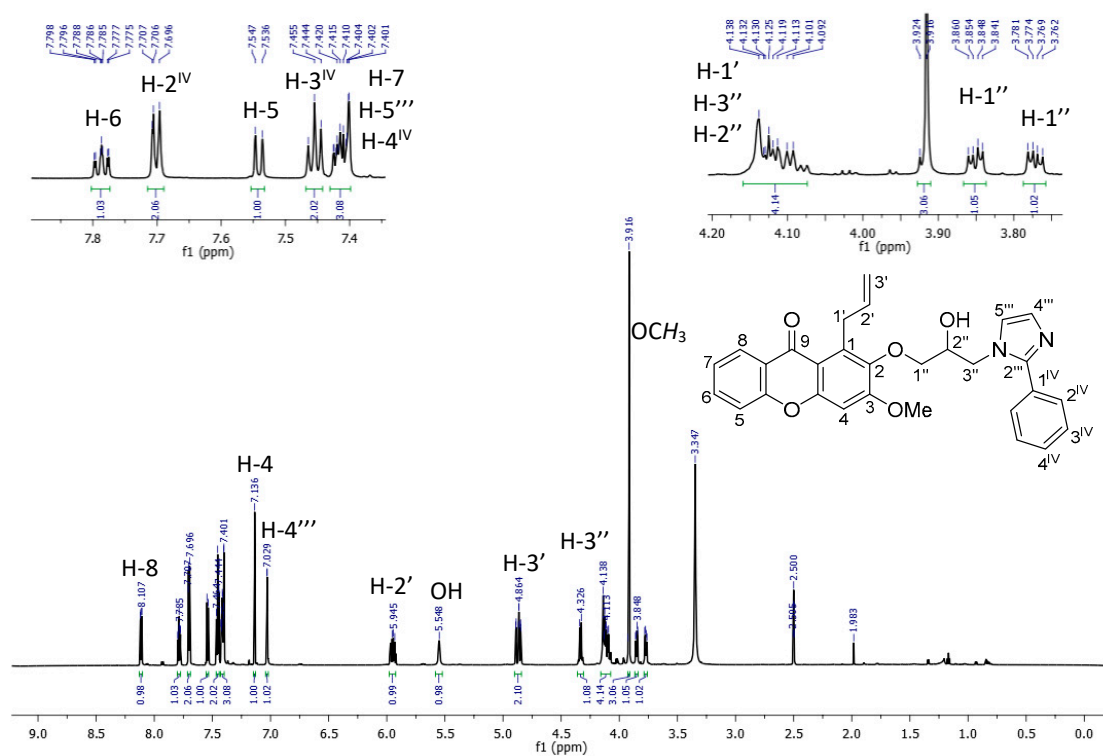

**Figure S75.**  $^1\text{H}$  NMR (750 MHz,  $\text{DMSO}-d_6$ ) spectrum of **12e**.

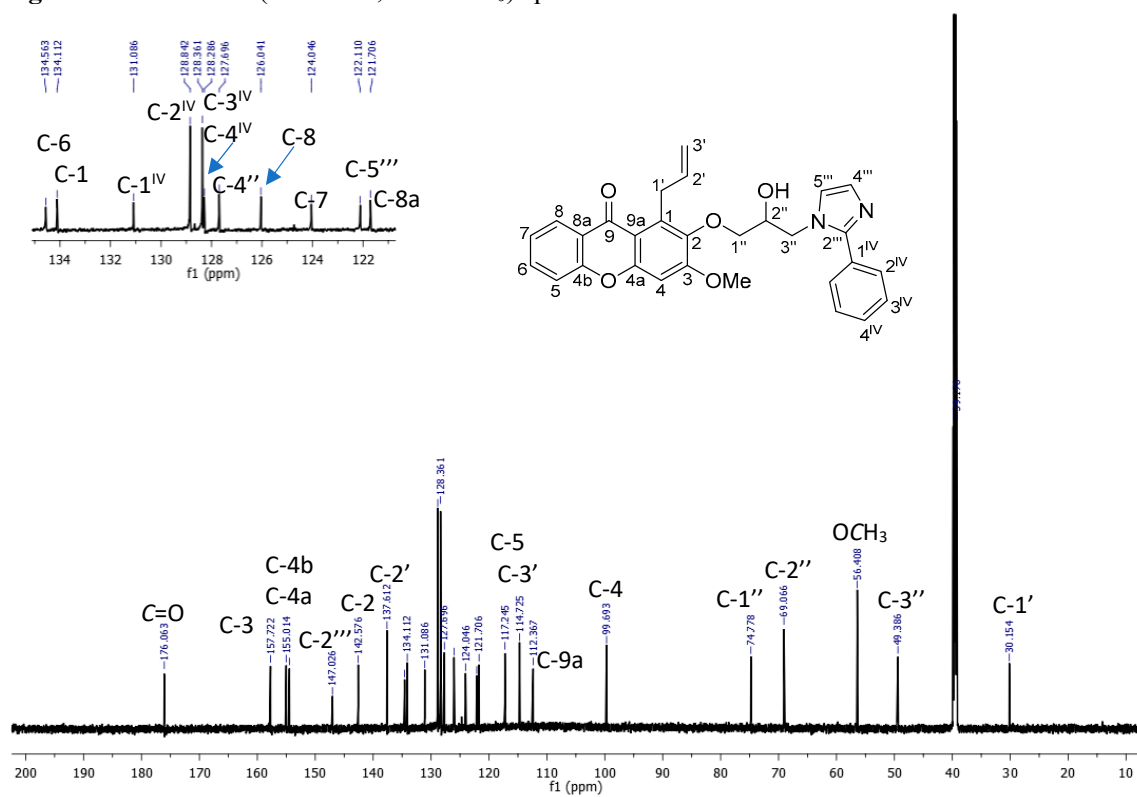

**Figure S76.**  $^{13}\text{C}$  NMR (187.5 MHz,  $\text{DMSO}-d_6$ ) spectrum of **12e**

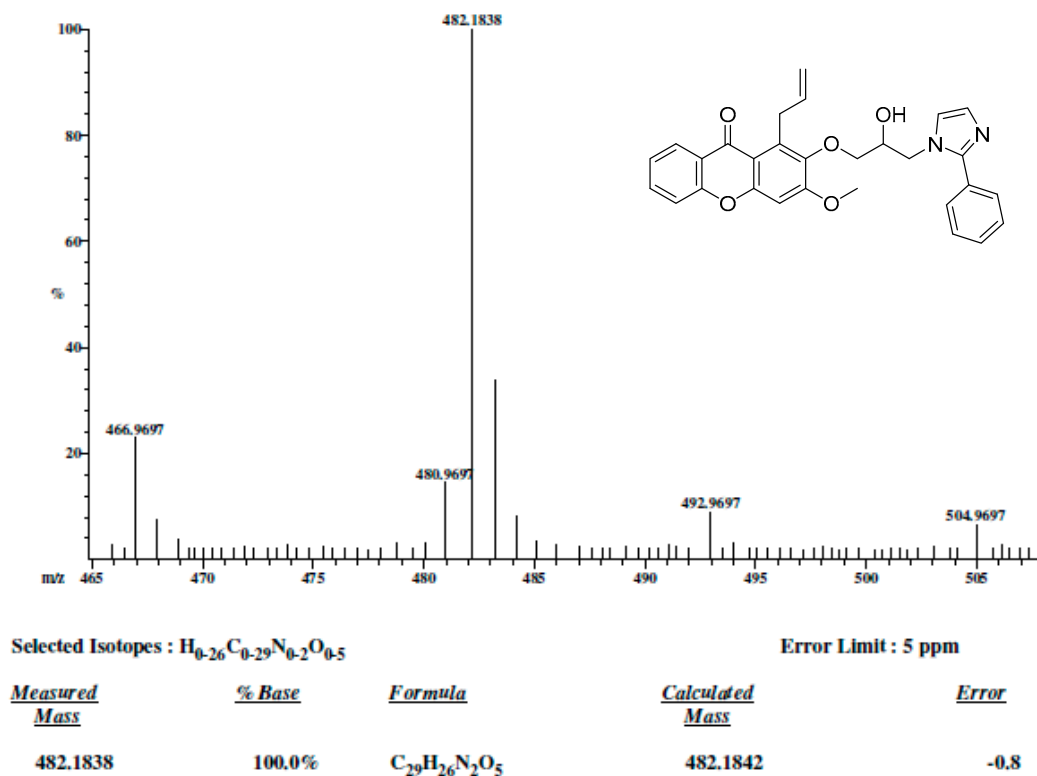

Figure S77. HRMS (EI) spectra of compound 12e.

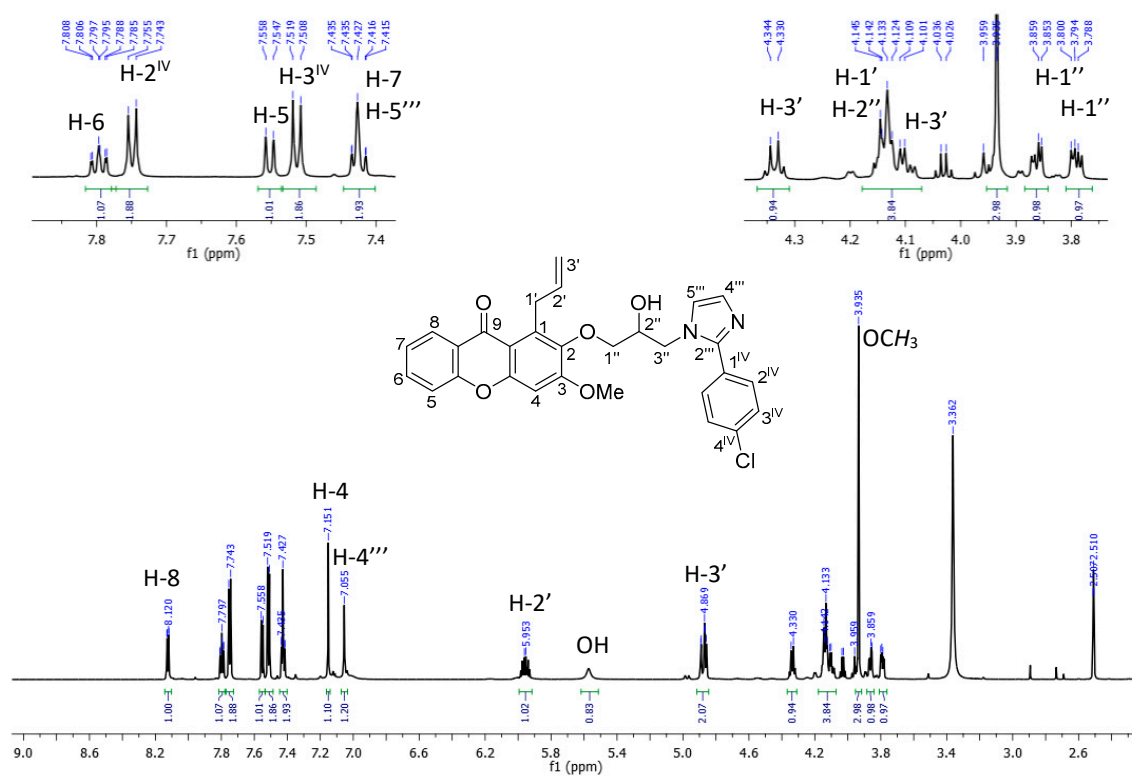

Figure S78.  $^1H$  NMR (750 MHz,  $DMSO-d_6$ ) spectrum of 12f.



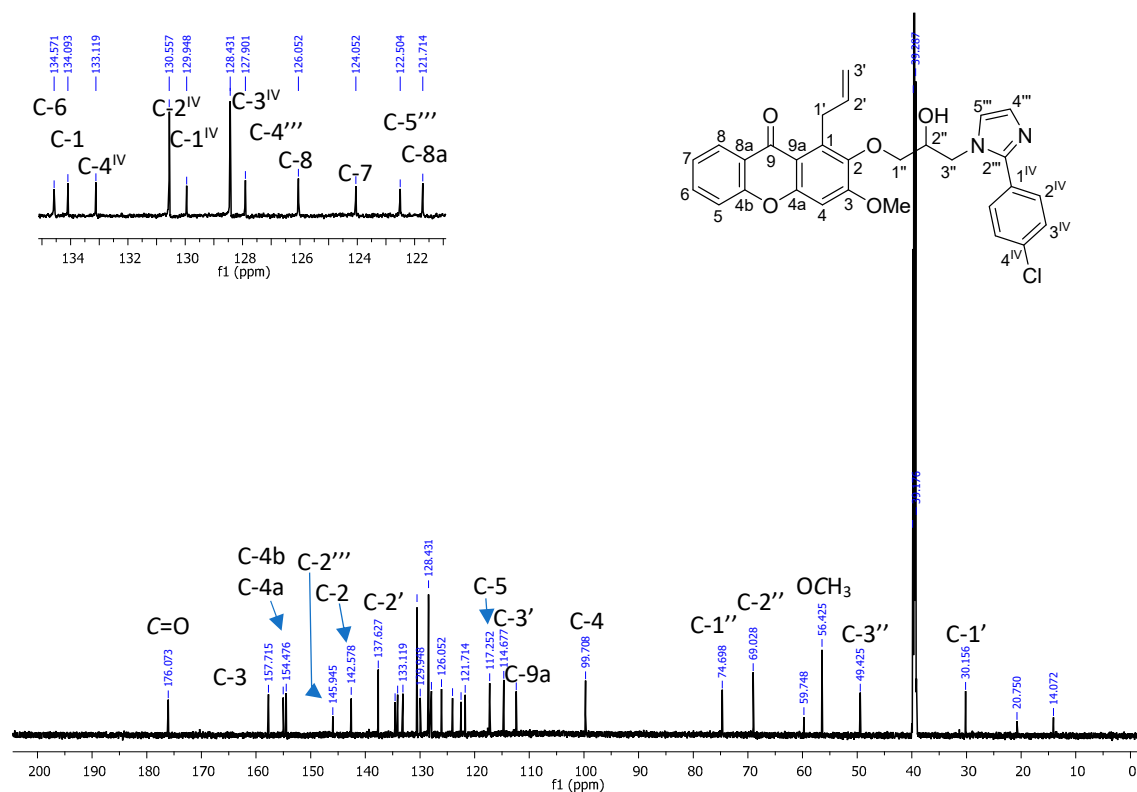

Figure S79.  $^{13}\text{C}$  NMR (187.5 MHz,  $\text{DMSO-}d_6$ ) spectrum of **12f**.

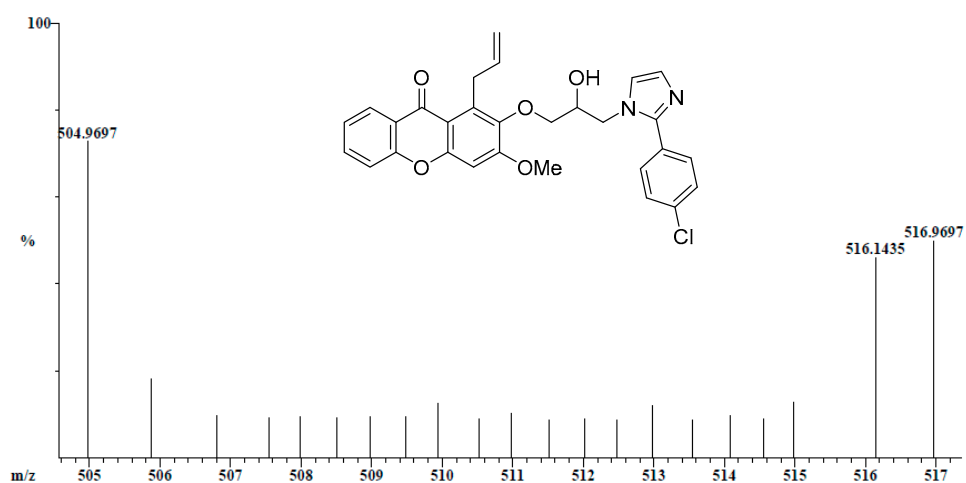

Selected Isotopes :  $\text{H}_{0-25}\text{C}_{0-29}\text{N}_{0-2}\text{O}_{0-5}\text{Cl}_{0-1}$

Error Limit : 5 ppm

Unsaturation Limits : 0 to 50

| <u>Measured</u><br><u>Mass</u> | <u>% Base</u> | <u>Formula</u>                                            | <u>Calculated</u><br><u>Mass</u> | <u>Error</u> | <u>Unsaturation</u> |
|--------------------------------|---------------|-----------------------------------------------------------|----------------------------------|--------------|---------------------|
| 516.1435                       | 46.1%         | $\text{C}_{29}\text{H}_{25}\text{N}_2\text{O}_5\text{Cl}$ | 516.1452                         | -3.3         | 18.0                |

Figure S80. HRMS (EI) spectra of compound **12f**.

**Table S1.** Docking results of **10c** at the active site binding pocket of isomaltase.

| Compound   | Binding energy $\Delta G$ (kcal/mol) | Interaction residues                                                                           | Polar interactions                                                            | Hydrophobic interactions                                                   |
|------------|--------------------------------------|------------------------------------------------------------------------------------------------|-------------------------------------------------------------------------------|----------------------------------------------------------------------------|
| <b>10c</b> | -9.82                                | Tyr158, Phe159, Phe178, Val216, Gln279, His280, Phe303, Arg315, Tyr316, Asp352, Glu411, Arg442 | C-H $\cdots$ O (Tyr316)<br>C-H $\cdots$ O (Glu411)<br>O $\cdots$ H-N (Arg442) | $\pi$ -alkyl-Phe178, Val216<br>$\pi$ -cation-Arg315<br>$\pi$ -anion-Asp352 |

**10c**

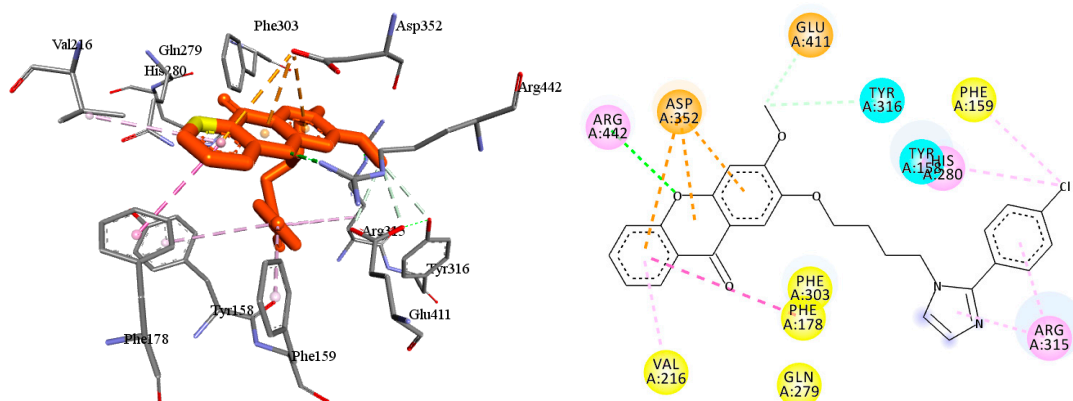

**Figure 81.** Molecular docking found for **10c** within the active pocket of isomaltase.

**Table S2.** Docking results of imidazole-substituted xanthenes **6c**, **9a** at the active site binding pocket of  $\alpha$ -amylase.

| Compound  | Binding energy $\Delta G$ (kcal/mol) | Interaction residues                                                                | Polar interactions      | Hydrophobic interactions                                                                         |
|-----------|--------------------------------------|-------------------------------------------------------------------------------------|-------------------------|--------------------------------------------------------------------------------------------------|
| <b>6c</b> | -7.86                                | Trp58, Trp59, Tyr62, His101, Leu165, Arg195, Asp197, Glu233, His299, Asp300, His305 | C-H $\cdots$ O (His299) | $\pi$ - $\pi$ stacked-Tyr62<br>$\pi$ -alkyl-Leu165<br>$\pi$ -anion-Asp300<br>$\pi$ -sigma-His305 |
| <b>9a</b> | -6.67                                | Trp58, Trp59, Tyr62, Leu165, Arg195, Asp197, Glu233, His299, Asp300, His305         | C-H $\cdots$ O (His299) | $\pi$ - $\pi$ T-shaped-Tyr62<br>$\pi$ -anion-Asp300<br>$\pi$ -sigma-His305                       |

**6c**

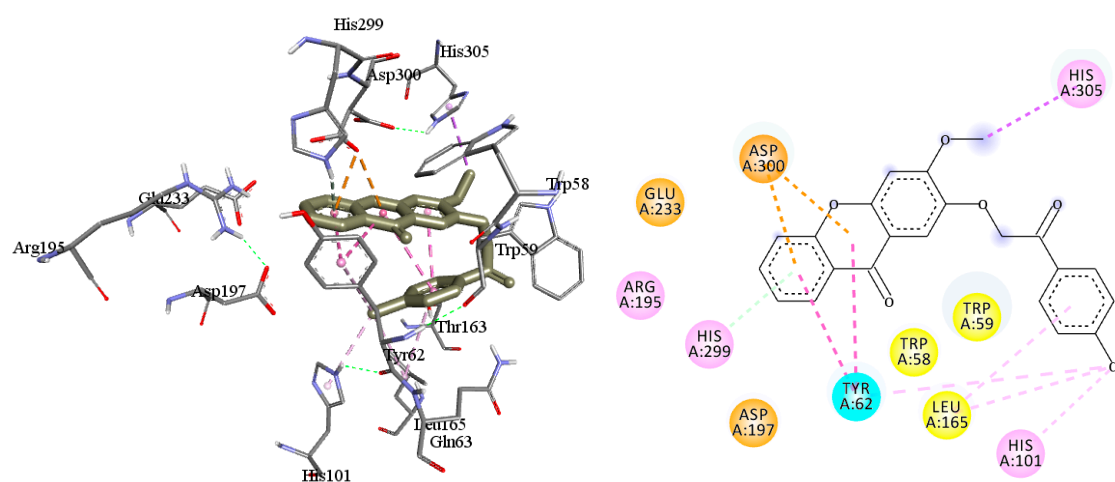

**9a**

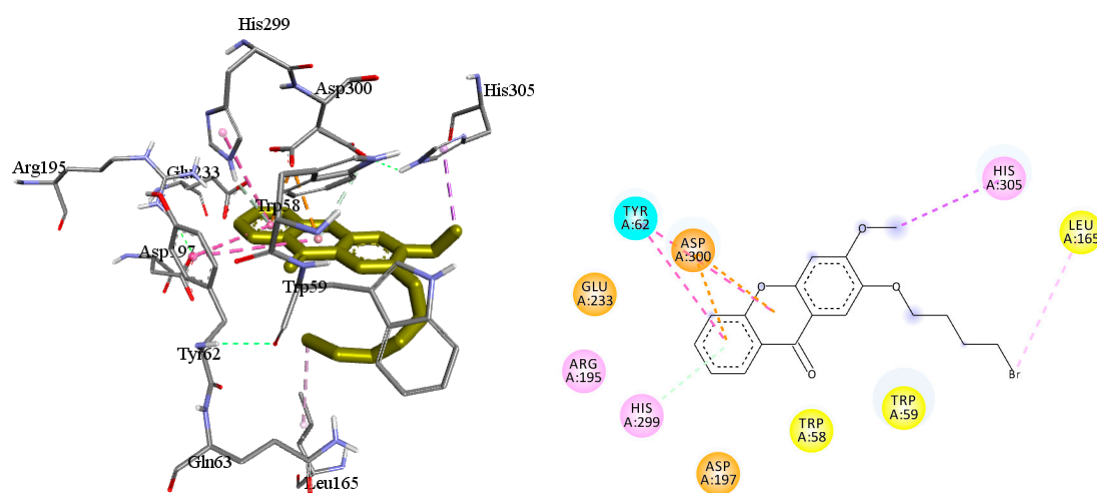

**Fig. S82.** Molecular docking found for **6c** and **9a** at the active site binding pocket of  $\alpha$ -amylase.

**Table S3.** Calculated physicochemical properties of **1**, **6a**, **6c**, **6e**, **7**, **9a-b**, **10c**, **10f**, **11b**, **12b-f**, and **(14)**.

| Compound   | MW (g/mol) | Log P | Log S | PSA    | H-A | H-D |
|------------|------------|-------|-------|--------|-----|-----|
| <b>14</b>  | 645.605    | -7.17 | 0.58  | 321.17 | 19  | 14  |
| <b>1</b>   | 242.229    | 2.95  | -4.64 | 55.76  | 4   | 1   |
| <b>6a</b>  | 314.292    | 2.78  | -4.86 | 71.06  | 6   | 0   |
| <b>6c</b>  | 394.809    | 4.79  | -7.31 | 61.83  | 5   | 0   |
| <b>6e</b>  | 434.874    | 5.82  | -8.02 | 61.83  | 6   | 0   |
| <b>7</b>   | 282.294    | 3.97  | -5.36 | 55.76  | 4   | 1   |
| <b>9a</b>  | 377.233    | 4.90  | -6.34 | 44.76  | 4   | 0   |
| <b>9b</b>  | 417.298    | 5.93  | -7.05 | 44.76  | 4   | 0   |
| <b>10c</b> | 474.943    | 6.02  | -7.79 | 62.58  | 6   | 0   |
| <b>10f</b> | 515.007    | 7.05  | -8.51 | 62.58  | 6   | 0   |
| <b>11b</b> | 338.358    | 3.87  | -5.82 | 57.29  | 5   | 0   |
| <b>12b</b> | 442.470    | 3.93  | -6.39 | 82.81  | 7   | 1   |
| <b>12c</b> | 476.915    | 4.54  | -7.13 | 82.81  | 7   | 1   |
| <b>12d</b> | 406.437    | 3.32  | -4.96 | 82.81  | 7   | 1   |
| <b>12e</b> | 482.534    | 4.96  | -7.10 | 82.81  | 7   | 1   |
| <b>12f</b> | 516.980    | 5.57  | -7.84 | 82.81  | 7   | 1   |

MW, molecular weight (<500 g/mol); Log P, octanol/water partition coefficient (<5); Log S, aqueous solubility; PSA, topological polar surface area; HA, hydrogen bond acceptor (<10); HD, hydrogen bond donor (<5)

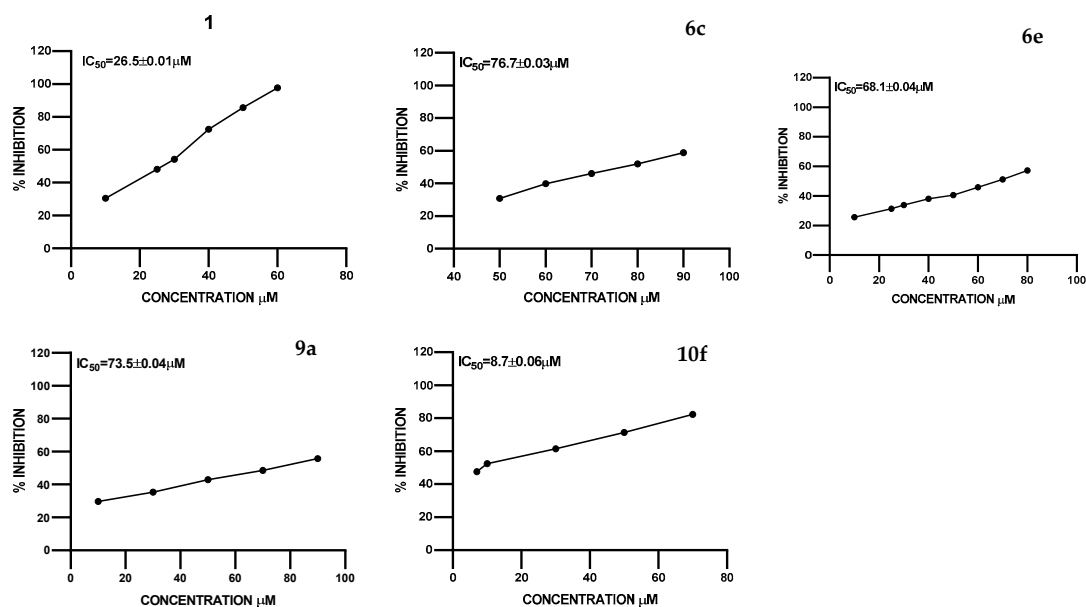

**Figure S83.**  $IC_{50}$  of compounds against  $\alpha$ -amylase enzyme.

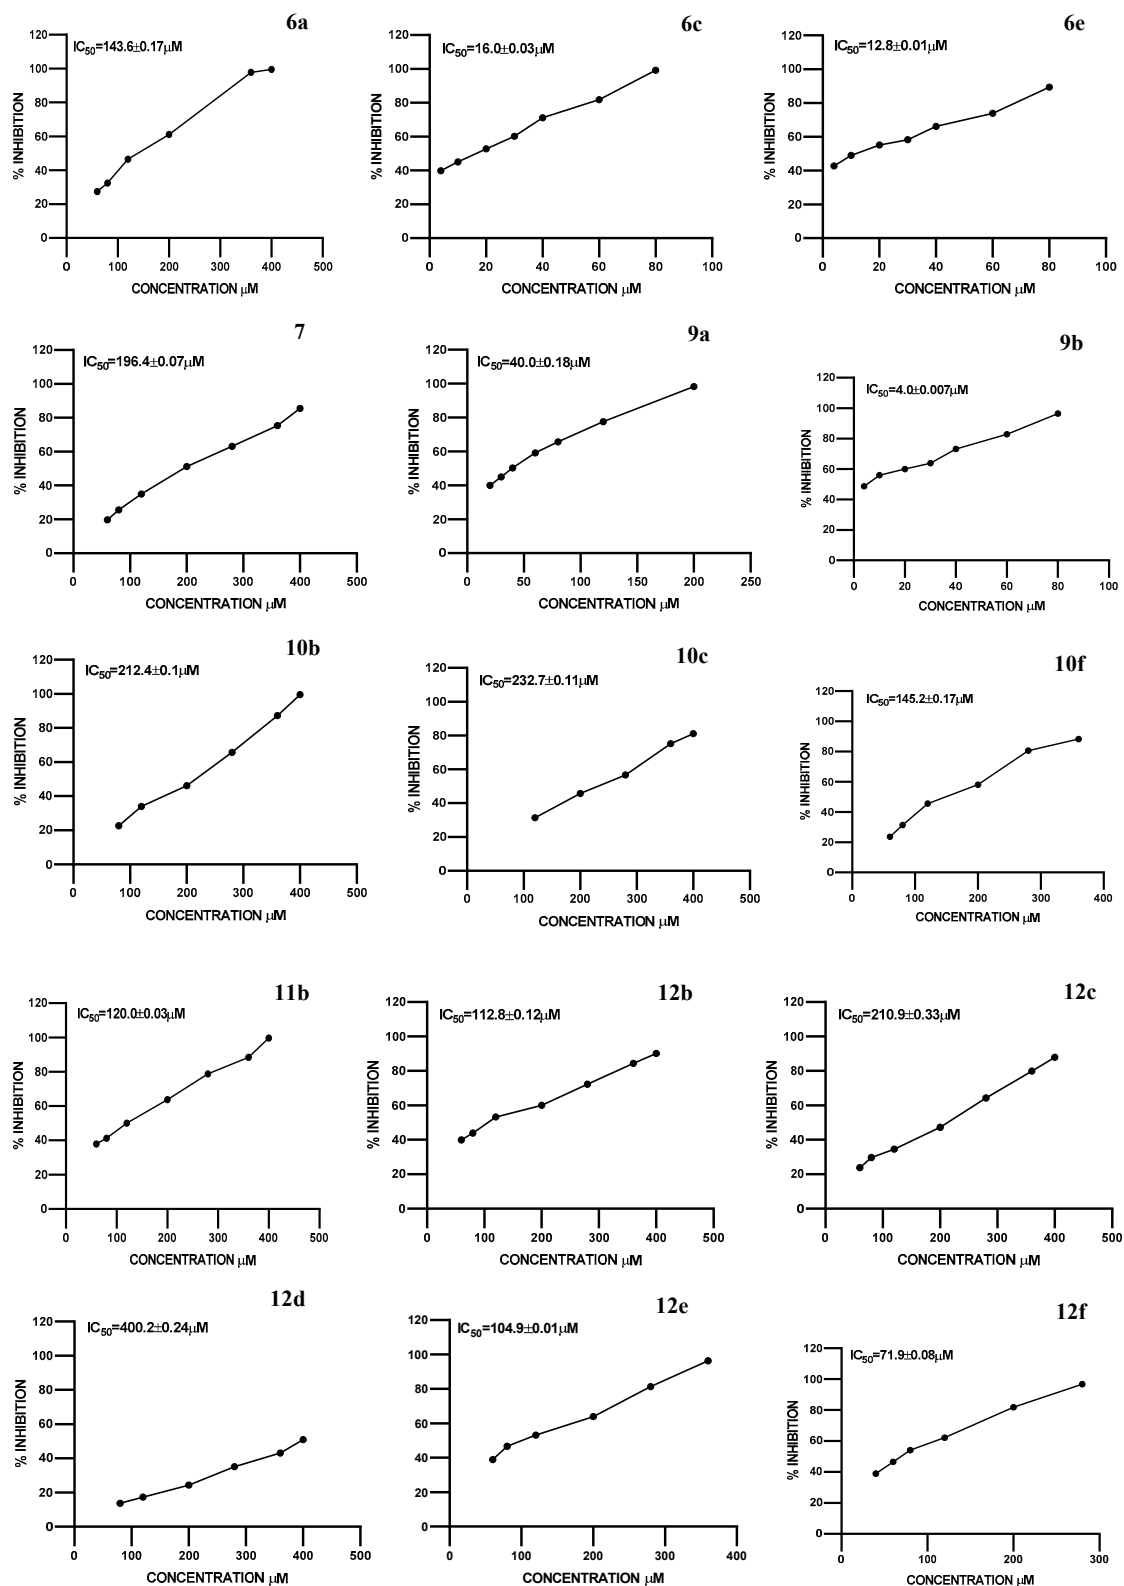

Figure S84.  $IC_{50}$  of compounds against  $\alpha$ -glucosidase enzyme.
